# Supplementary material for: Practical and sustainable preparation of pyrrolo[2,3-b]indoles by Cu/Fe catalyzed intramolecular C(sp2)–H amination
Source: Royal Society of Chemistry journal article supplement (doi:10.1039/d2gc02340g), 2022-01-01
Supplement: d2gc02340g1.pdf [file d2gc02340g1.pdf]

## ELECTRONIC SUPPORTING INFORMATION

---

# **Practical and Sustainable Preparation of Pyrrolo[2,3-*b*]indoles by Cu/Fe Catalyzed Intramolecular C(sp<sup>2</sup>)-H Amination**

*Matteo Corrieri, Lucia De Crescentini, Fabio Mantellini, Giacomo Mari, Stefania Santeusanio, and  
Gianfranco Favi\**

*Department of Biomolecular Sciences, Section of Chemistry and Pharmaceutical Technologies, University of  
Urbino "Carlo Bo", Via I Maggetti 24, 61029 Urbino, Italy*

*Email: gianfranco.favi@uniurb.it*

## Table of Contents

|                                                                              |         |
|------------------------------------------------------------------------------|---------|
| <b>1. General remarks</b>                                                    | S1      |
| <b>2. Synthesis and characterization of substrates</b>                       | S4–S9   |
| 2.1 Procedure for the synthesis of substrates <b>1a–v</b>                    | S5      |
| 2.2 Characterization of substrates                                           | S5–S9   |
| <b>3. Copper-Iron catalyzed Intramolecular C(sp<sup>2</sup>)-H Amination</b> | S9–S17  |
| 3.1 Preliminary optimization studies                                         | S9–S10  |
| 3.2 Procedure for the synthesis of products <b>2a–t</b>                      | S11     |
| 3.3 Characterization of products                                             | S11–S17 |
| <b>4. Recycling of the aqueous catalytic system</b>                          | S18     |
| <b>5. Synthetic transformations</b>                                          | S19–S22 |
| 5.1 Access to compound <b>3</b>                                              | S19     |
| 5.2 Access to compound <b>4</b>                                              | S20     |
| 5.3 Access to compound <b>5b</b>                                             | S20–S21 |
| 5.4 Access to compound <b>6</b>                                              | S21     |
| 5.5 Access to compound <b>7</b>                                              | S22     |
| <b>6. <sup>1</sup>H and <sup>13</sup>C NMR spectra</b>                       | S23–S48 |
| <b>7. First Pass CHEM21 green metrics toolkit</b>                            | S49     |
| <b>8. References</b>                                                         | S51     |

### 1. General Remarks

All the commercially available reagents and solvents were used without further purification.  $\alpha$ -(Indol-3-yl)hydrazones **1a–v** were prepared according to our previously reported method with a slight modification.<sup>1,2</sup> Chromatographic purification of compounds was carried out on silica gel (60–200  $\mu\text{m}$ ). TLC analysis was performed on pre-loaded (0.25 mm) glass supported silica gel plates (Kieselgel 60); compounds were visualized by exposure to UV light and by dipping the plates in 1%  $\text{Ce}(\text{SO}_4)\cdot 4\text{H}_2\text{O}$ , 2.5%  $(\text{NH}_4)_6\text{Mo}_7\text{O}_{24}\cdot 4\text{H}_2\text{O}$  in 10% sulphuric acid followed by heating on a hot plate. All  $^1\text{H}$  NMR and  $^{13}\text{C}$  NMR spectra were recorded at 400 and 100 MHz using  $\text{DMSO-}d_6$  or  $\text{CDCl}_3$  as solvent on a Bruker Ultrashield 400 spectrometer (Bruker, Billerica, MA, USA). Chemical shift ( $\delta$  scale) are reported in parts per million (ppm) relative to the central peak of the solvent and are sorted in descending order within each group. The following abbreviations are used to describe peak patterns where appropriate: s = singlet, d = doublet, dd = doublet of doublet, dt = doublet of triplet, t = triplet, q = quartet, sept = septet, m = multiplet and br = broad signal. All coupling constants (J value) are given in Hertz [Hz]. High-resolution mass spectral (HRMS) analyses were performed using Orbitrap Exploris 240 Mass Spectrometers (Thermo Scientific) equipped with an ESI source. Melting points were determined in open capillary tubes and are uncorrected.

## 2. Synthesis and characterization of substrates

List of substrates **1a–v** prepared according to the general procedures.<sup>1,2</sup>

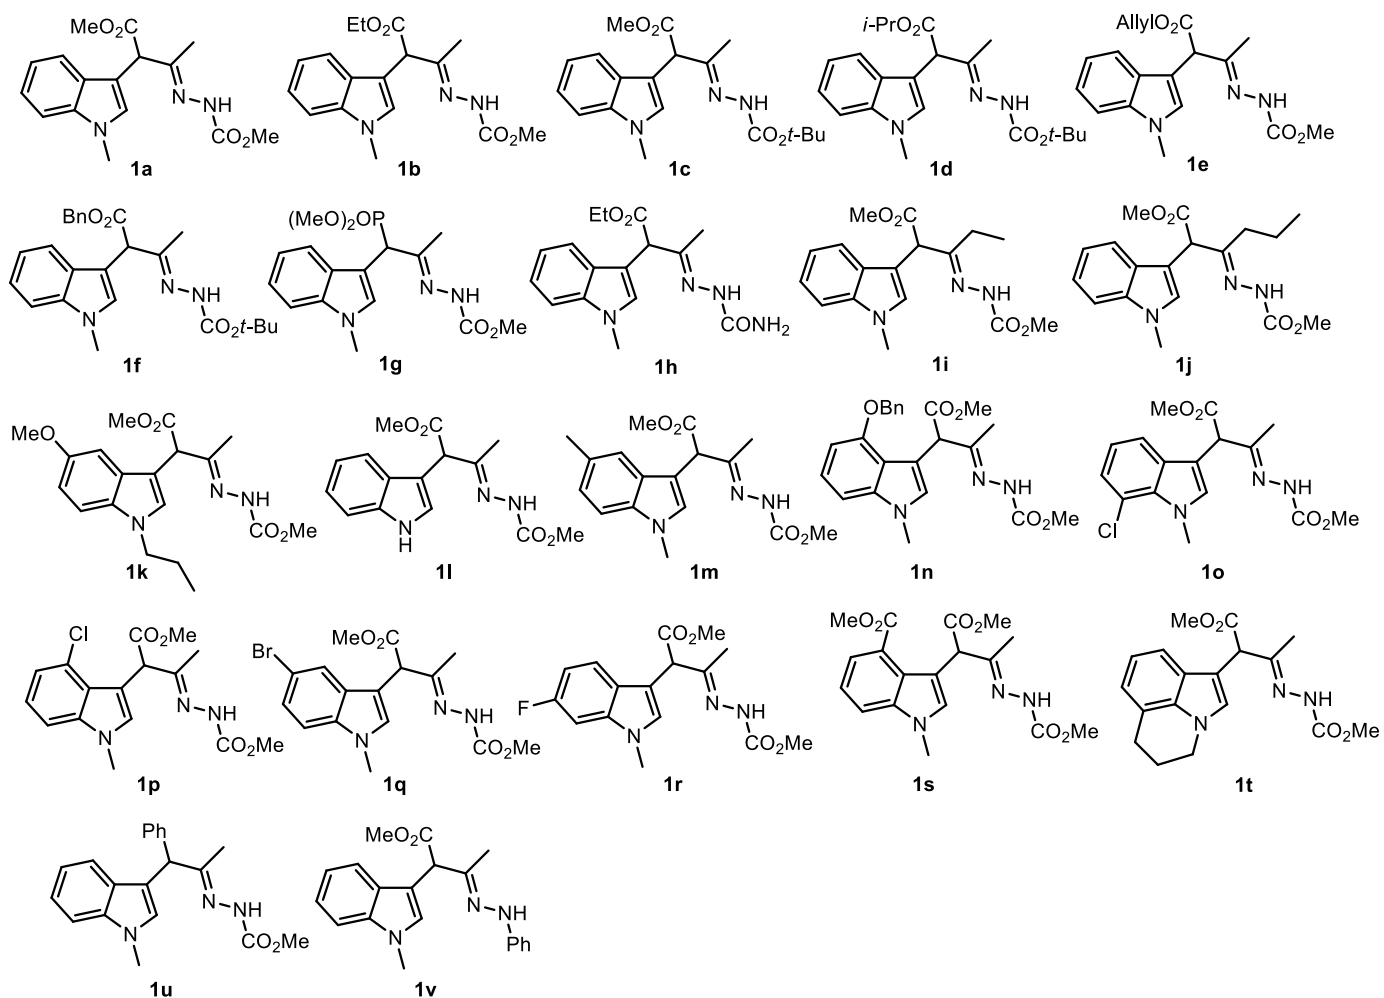

## ELECTRONIC SUPPORTING INFORMATION

### 2.1. Procedure for the synthesis of $\alpha$ -(indol-3-yl)hydrazones **1a–v**<sup>1,2</sup>:

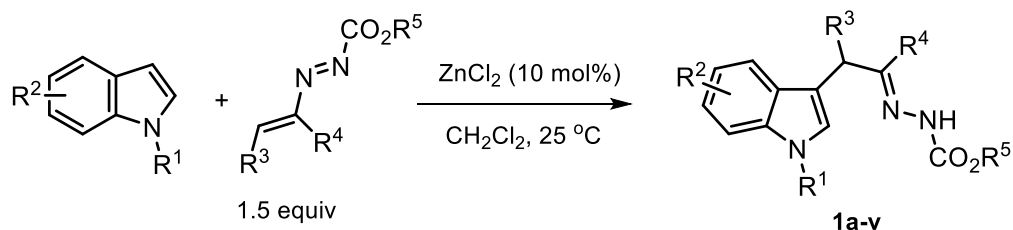

To a stirred mixture of indole (1 mmol) and azoalkene (1.5 mmol, 1.5 equiv) in dichloromethane (4 mL), zinc dichloride (13.6 mg, 0.1 mmol, 10 mol %) was added. After the disappearance of indole (0.25–18 h, TLC check), the solvent was removed and the crude mixture was purified by column chromatography on silica gel to afford, after crystallization, the  $\alpha$ -(indol-3-yl)hydrazones **1** (23–95% yields).

### 2.2 Characterization of substrates

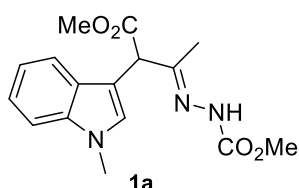

**Methyl 2-(4-methoxy-3-(1-methyl-1H-indol-3-yl)-4-oxobutan-2-ylidene)hydrazinecarboxylate (1a)**: The chemical-physical data of compound **1a** are in agreement with those reported.<sup>2</sup>

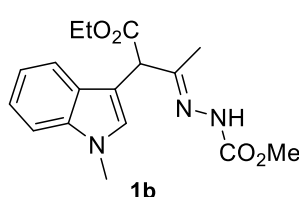

**Methyl 2-(4-ethoxy-3-(1-methyl-1H-indol-3-yl)-4-oxobutan-2-ylidene)hydrazinecarboxylate (1b)**: The chemical-physical data of compound **1b** are in agreement with those reported.<sup>2</sup>

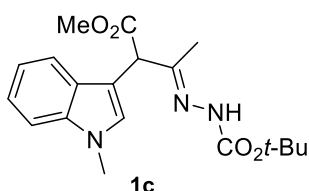

***tert*-Butyl 2-(4-methoxy-3-(1-methyl-1H-indol-3-yl)-4-oxobutan-2-ylidene)hydrazinecarboxylate (1c)**: Compound **1c** was isolated by column chromatography (ethyl acetate/cyclohexane 35:65) in 60% yield (216.6 mg), 1 h; white solid; mp: 138–140 °C. <sup>1</sup>H NMR (400 MHz, DMSO-*d*<sub>6</sub>)  $\delta$  9.57 (br, 1H), 7.45 (d,  $J$  = 8.0 Hz, 1H), 7.41 (d,  $J$  = 8.4 Hz, 1H), 7.32 (s, 1H), 7.17–7.13 (m, 1H), 7.04–7.00 (m, 1H), 4.83 (s, 1H), 3.77 (s, 3H), 3.66 (s, 3H), 1.76 (s, 3H), 1.45 (s, 9H). <sup>13</sup>C NMR (100 MHz, DMSO-*d*<sub>6</sub>)  $\delta$  171.2, 153.0, 150.2, 136.5, 128.5, 126.8, 121.3, 118.9, 118.7, 109.8, 107.6, 79.1,

## ELECTRONIC SUPPORTING INFORMATION

51.9, 51.3, 32.4, 28.1, 14.5. HRMS (ESI-Orbitrap,  $m/z$ ):  $[M+H]^+$  calcd for  $C_{19}H_{25}N_3O_4$  360.1918, found 360.1923.

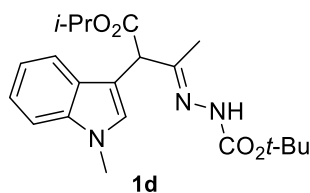

**tert-Butyl 2-(4-isopropoxy-3-(1-methyl-1*H*-indol-3-yl)-4-oxobutan-2-ylidene)hydrazinecarboxylate: (1d):** The chemical-physical data of compound **1d** are in agreement with those reported.<sup>2</sup>

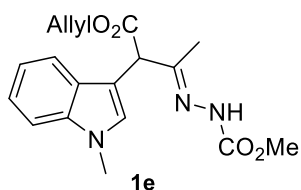

**Methyl 2-(4-allyloxy-3-(1-methyl-1*H*-indol-3-yl)-4-oxobutan-2-ylidene)hydrazinecarboxylate: (1e):** The chemical-physical data of compound **1e** are in agreement with those reported.<sup>2</sup>

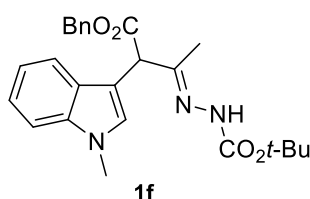

**tert-Butyl 2-(4-(benzyloxy)-3-(1-methyl-1*H*-indol-3-yl)-4-oxobutan-2-ylidene)hydrazinecarboxylate (1f):** The chemical-physical data of compound **1f** are in agreement with those reported.<sup>2</sup>

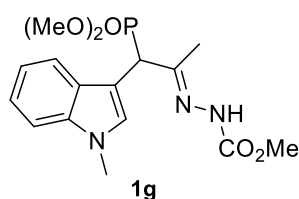

**Methyl 2-(1-(dimethoxyphosphoryl)-1-(1-methyl-1*H*-indol-3-yl)propan-2-ylidene)hydrazinecarboxylate: (1g):** The chemical-physical data of compound **1g** are in agreement with those reported.<sup>2</sup>

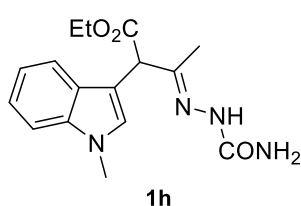

**Ethyl 3-(2-carbamoylhydrazono)-2-(1-methyl-1*H*-indol-3-yl)butanoate: (1h):** The chemical-physical data of compound **1h** are in agreement with those reported.<sup>2</sup>

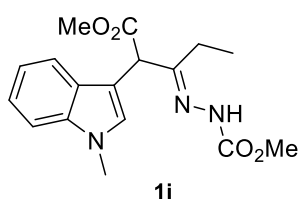

**Methyl 2-(1-methoxy-2-(1-methyl-1*H*-indol-3-yl)-1-oxopentan-3-ylidene)hydrazinecarboxylate: (1i):** The chemical-physical data of compound **1i** are in agreement with those reported.<sup>2</sup>

## ELECTRONIC SUPPORTING INFORMATION

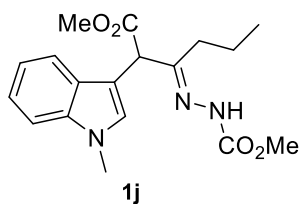

**Methyl 2-(1-methoxy-2-(1-methyl-1H-indol-3-yl)-1-oxohexan-3-ylidene)hydrazinecarboxylate: (1j):** The chemical-physical data of compound **1j** are in agreement with those reported.<sup>2</sup>

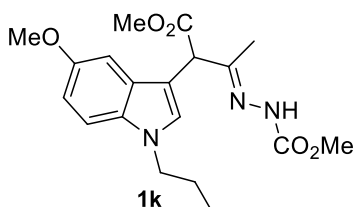

**Methyl 2-(4-methoxy-4-oxo-3-(1-propyl-1H-indol-3-yl)butan-2-ylidene)hydrazinecarboxylate: (1k):** The chemical-physical data of compound **1k** are in agreement with those reported.<sup>2</sup>

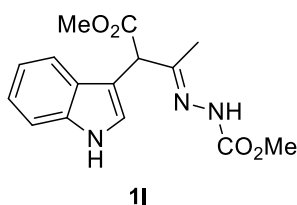

**Methyl 2-(3-(1H-indol-3-yl)-4-methoxy-4-oxobutan-2-ylidene)hydrazinecarboxylate: (1l):** The chemical-physical data of compound **1l** are in agreement with those reported.<sup>2</sup>

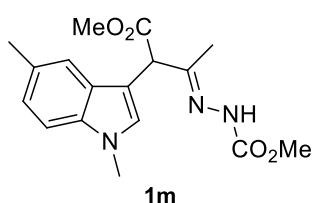

**Methyl 2-(3-(1,5-dimethyl-1H-indol-3-yl)-4-methoxy-4-oxobutan-2-ylidene)hydrazinecarboxylate: (1m):** The chemical-physical data of compound **1m** are in agreement with those reported.<sup>2</sup>

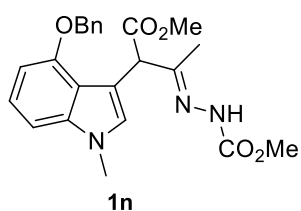

**Methyl 2-(3-(4-(benzyloxy)-1-methyl-1H-indol-3-yl)-4-methoxy-4-oxobutan-2-ylidene)hydrazinecarboxylate: (1n):** The chemical-physical data of compound **1n** are in agreement with those reported.<sup>2</sup>

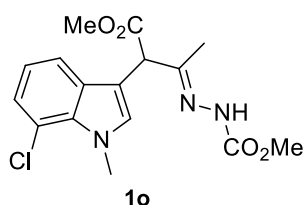

**Methyl 2-(3-(7-chloro-1-methyl-1H-indol-3-yl)-4-methoxy-4-oxobutan-2-ylidene)hydrazinecarboxylate: (1o):** The chemical-physical data of compound **1o** are in agreement with those reported.<sup>2</sup>

## ELECTRONIC SUPPORTING INFORMATION

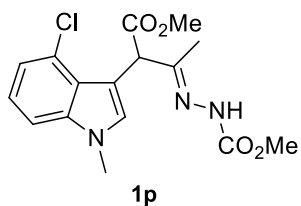

**Methyl 2-(3-(4-chloro-1-methyl-1*H*-indol-3-yl)-4-methoxy-4-oxobutan-2-ylidene)hydrazinecarboxylate: (1p):** The chemical-physical data of compound **1p** are in agreement with those reported.<sup>2</sup>

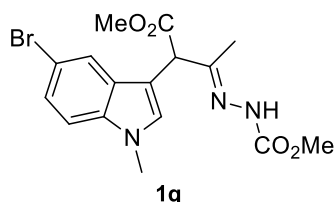

**Methyl 2-(3-(5-bromo-1-methyl-1*H*-indol-3-yl)-4-methoxy-4-oxobutan-2-ylidene)hydrazinecarboxylate: (1q):** The chemical-physical data of compound **1q** are in agreement with those reported.<sup>2</sup>

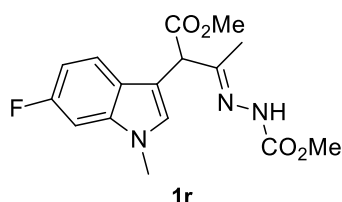

**Methyl 2-(3-(6-fluoro-1-methyl-1*H*-indol-3-yl)-4-methoxy-4-oxobutan-2-ylidene)hydrazinecarboxylate: (1r):** The chemical-physical data of compound **1r** are in agreement with those reported.<sup>2</sup>

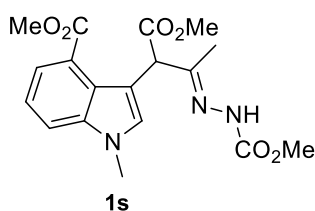

**Methyl 3-(1-methoxy-3-(2-(methoxycarbonyl)hydrazono)-1-oxobutan-2-yl)-1-methyl-1*H*-indole-4-carboxylate: (1s):** The chemical-physical data of compound **1s** are in agreement with those reported.<sup>2</sup>

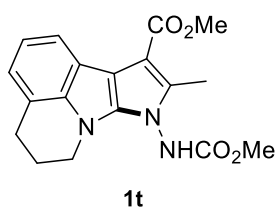

**Methyl 2-(3-(5,6-dihydro-4*H*-pyrrolo[3,2,1-*ij*]quinolin-1-yl)-4-methoxy-4-oxobutan-2-ylidene)hydrazinecarboxylate: (1t):** The chemical-physical data of compound **1t** are in agreement with those reported.<sup>2</sup>

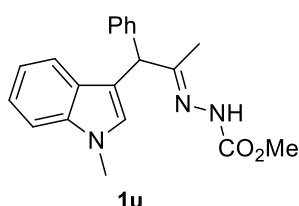

**Methyl 2-(1-(1-methyl-1*H*-indol-3-yl)-1-phenylpropan-2-ylidene)hydrazinecarboxylate: (1u):** The chemical-physical data of compound **1u** are in agreement with those reported.<sup>2</sup>



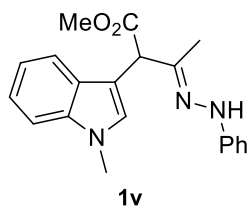**Methyl 2-(1-methyl-1*H*-indol-3-yl)-3-(2-phenylhydrazono)butanoate (1v):**

Compound **1v** was isolated by column chromatography (ethyl acetate/cyclohexane 30:70) in 64% yield (215.0 mg), 4 h; pale yellow solid; mp: 121–122 °C. <sup>1</sup>H NMR (400 MHz, DMSO-*d*<sub>6</sub>) δ 8.90 (s, 1H), 7.50 (d, *J* = 8.0 Hz, 1H), 7.41 (d, *J* = 8.0 Hz, 1H), 7.32 (s, 1H), 7.20–7.12 (m, 3H), 7.10–7.07 (m, 2H), 7.02–6.98 (m, 1H), 6.74–6.69 (m, 1H), 4.91 (s, 1H), 3.77 (s, 3H), 3.69 (s, 3H), 1.83 (s, 3H). <sup>13</sup>C NMR (100 MHz, DMSO-*d*<sub>6</sub>) δ 171.6, 146.3, 142.7, 136.6, 128.8, 128.4, 127.0, 121.2, 118.9, 118.8, 118.4, 112.4, 109.7, 108.3, 51.8, 51.3, 32.4, 14.1. HRMS (ESI-Orbitrap, *m/z*): [M+H]<sup>+</sup> calcd for C<sub>20</sub>H<sub>21</sub>N<sub>3</sub>O<sub>2</sub> 336.1707, found: 336.1701.

**3. Copper-Iron catalyzed Intramolecular C(sp<sup>2</sup>)-H Amination**

## 3.1 Preliminary optimization studies

**Optimization of Reaction Conditions for the Intramolecular Oxidative Cyclization of 1a (Table S1).**

First, we tested the conversion of α-indolylhydrazone **1a** to 1-amino pyrrolo[2,3-*b*]indole **2a** using a combination of a palladium catalyst and an oxidant. To our delight, product **2a** was obtained in 90% yield in the presence of Pd(OAc)<sub>2</sub> (0.1 mmol) and AgOAc (2 equiv) in DCM at room temperature (entry 1). A further investigation of the process revealed that the palladium catalyst was not needed since both Cu(OAc)<sub>2</sub>·H<sub>2</sub>O (0.1 mmol) or FeCl<sub>3</sub>·6H<sub>2</sub>O (0.1 mmol) alone catalyze the reaction albeit with scarce yield and poor conversion (entries 2 and 3). On the other hand, we were pleased to find that the intramolecular C–N coupling was successful in the presence of catalytic amounts of both Cu(OAc)<sub>2</sub>·H<sub>2</sub>O and FeCl<sub>3</sub>·6H<sub>2</sub>O (82% yield, entry 4). A comparable yield of **2a** (76%) within a shorter reaction time was registered when the reaction was conducted in DCE at 50 °C (entry 5). Extra additives such as acid (PivOH) and base (K<sub>2</sub>CO<sub>3</sub>) gave inferior results (entries 6 and 7). Doubling the co-catalyst loading led to a slightly increase in the yield of **2a** (entry 8). A contextual reducing of the half the amount of catalyst (0.05 mmol) and doubling that of co-catalyst (0.1 mmol) did not lead to a significant improvement in yield (76%, entry 9). Other copper salts with different oxidation states (I, II) tested (e.g., CuO, Cu(OTf)<sub>2</sub>, CuCl<sub>2</sub>, CuI, and CuCl) in combination with FeCl<sub>3</sub>·6H<sub>2</sub>O co-catalyst also performed well (entries 10–14). Finally, different solvents were explored, and the best result was obtained when acetone/H<sub>2</sub>O, or neat H<sub>2</sub>O was used, albeit with slower conversion for the latter (entries 15–20). Based on these preliminary studies and considering the economic and environmental issue we decided to employ H<sub>2</sub>O as a solvent for the transformation. Therefore, conditions involving 10 mol% of Cu(OAc)<sub>2</sub>·H<sub>2</sub>O and 5 mol% of FeCl<sub>3</sub>·6H<sub>2</sub>O in H<sub>2</sub>O at room temperature were selected as base to further optimize this intramolecular C–H amination.

## ELECTRONIC SUPPORTING INFORMATION

Table S1: Preliminary experiments<sup>a</sup>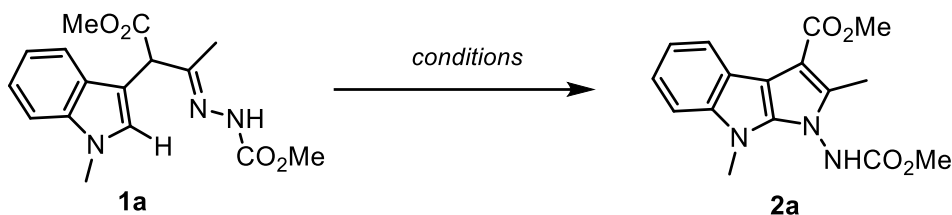

| entry          | catalyst [equiv.]                             | co-catalyst [equiv.]                        | additive [equiv.]                    | solvent                                   | t [h] | yield [%] <sup>b</sup> |
|----------------|-----------------------------------------------|---------------------------------------------|--------------------------------------|-------------------------------------------|-------|------------------------|
| 1 <sup>c</sup> | Pd(OAc) <sub>2</sub> (0.1)                    | –                                           | –                                    | DCM                                       | 3     | 90                     |
| 2              | FeCl <sub>3</sub> ·6H <sub>2</sub> O (0.1)    | –                                           | –                                    | DCM                                       | 12    | 28 <sup>d,e</sup>      |
| 3              | Cu(OAc) <sub>2</sub> ·H <sub>2</sub> O (0.1)  | –                                           | –                                    | DCM                                       | 12    | 33                     |
| 4              | Cu(OAc) <sub>2</sub> ·H <sub>2</sub> O (0.1)  | FeCl <sub>3</sub> ·6H <sub>2</sub> O (0.05) | –                                    | DCM                                       | 5     | 82                     |
| 5              | Cu(OAc) <sub>2</sub> ·H <sub>2</sub> O (0.1)  | FeCl <sub>3</sub> ·6H <sub>2</sub> O (0.05) | –                                    | DCE <sup>f</sup>                          | 0.8   | 76                     |
| 6              | Cu(OAc) <sub>2</sub> ·H <sub>2</sub> O (0.1)  | FeCl <sub>3</sub> ·6H <sub>2</sub> O (0.05) | PivOH (5.0)                          | DCM                                       | 18    | 60                     |
| 7              | Cu(OAc) <sub>2</sub> ·H <sub>2</sub> O (0.1)  | FeCl <sub>3</sub> ·6H <sub>2</sub> O (0.05) | K <sub>2</sub> CO <sub>3</sub> (2.0) | DCM                                       | 6     | 47                     |
| 8              | Cu(OAc) <sub>2</sub> ·H <sub>2</sub> O (0.1)  | FeCl <sub>3</sub> ·6H <sub>2</sub> O (0.1)  | –                                    | DCM                                       | 4     | 83                     |
| 9              | Cu(OAc) <sub>2</sub> ·H <sub>2</sub> O (0.05) | FeCl <sub>3</sub> ·6H <sub>2</sub> O (0.1)  | –                                    | DCM                                       | 5     | 76                     |
| 10             | CuO (0.1)                                     | FeCl <sub>3</sub> ·6H <sub>2</sub> O (0.05) | –                                    | DCM                                       | 4     | 83                     |
| 11             | Cu(OTf) <sub>2</sub> (0.1)                    | FeCl <sub>3</sub> ·6H <sub>2</sub> O (0.05) | –                                    | DCM                                       | 8     | 76                     |
| 12             | CuCl <sub>2</sub> (0.1)                       | FeCl <sub>3</sub> ·6H <sub>2</sub> O (0.05) | –                                    | DCM                                       | 12    | 82                     |
| 13             | CuI (0.1)                                     | FeCl <sub>3</sub> ·6H <sub>2</sub> O (0.05) | –                                    | DCM                                       | 24    | 79                     |
| 14             | CuCl (0.1)                                    | FeCl <sub>3</sub> ·6H <sub>2</sub> O (0.05) | –                                    | DCM                                       | 24    | 68                     |
| 15             | Cu(OAc) <sub>2</sub> ·H <sub>2</sub> O (0.1)  | FeCl <sub>3</sub> ·6H <sub>2</sub> O (0.05) | –                                    | toluene                                   | 24    | trace <sup>d</sup>     |
| 16             | Cu(OAc) <sub>2</sub> ·H <sub>2</sub> O (0.1)  | FeCl <sub>3</sub> ·6H <sub>2</sub> O (0.05) | –                                    | MeCN                                      | 1     | 35                     |
| 17             | Cu(OAc) <sub>2</sub> ·H <sub>2</sub> O (0.1)  | FeCl <sub>3</sub> ·6H <sub>2</sub> O (0.05) | –                                    | MeOH                                      | 1     | 54                     |
| 18             | Cu(OAc) <sub>2</sub> ·H <sub>2</sub> O (0.1)  | FeCl <sub>3</sub> ·6H <sub>2</sub> O (0.05) | –                                    | Me <sub>2</sub> CO                        | 1     | 57                     |
| 19             | Cu(OAc) <sub>2</sub> ·H <sub>2</sub> O (0.1)  | FeCl <sub>3</sub> ·6H <sub>2</sub> O (0.05) | –                                    | H <sub>2</sub> O(9)/Me <sub>2</sub> CO(1) | 3     | 95 <sup>g</sup>        |
| 20             | Cu(OAc) <sub>2</sub> ·H <sub>2</sub> O (0.1)  | FeCl <sub>3</sub> ·6H <sub>2</sub> O (0.05) | –                                    | H <sub>2</sub> O                          | 24    | 99 <sup>g</sup>        |

<sup>a</sup>All reaction were performed on 0.2 mmol scale of **1a** in 2 mL of solvent (0.1 M) under air atmospher for the indicate time. <sup>b</sup>All yields refer to the isolated product after column chromatography, unless otherwise noted. <sup>c</sup>AgOAc (2.0 eq.) as an external oxidant was used. <sup>d</sup>The unreacted

## ELECTRONIC SUPPORTING INFORMATION

starting material was recovered. <sup>e</sup>38% Yield of **2a** with complete consumption of **1a** was observed with 1.0 equiv. of FeCl<sub>3</sub>·6H<sub>2</sub>O. <sup>f</sup>Performed at 50 °C. <sup>g</sup>Without column chromatography.

### 3.2 Procedure for the synthesis of products **2a–t**

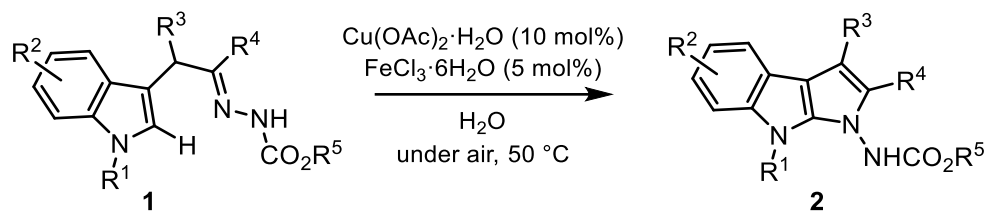

In a round-bottom flask,  $\alpha$ -indolylylhydrazone **1** (0.2 mmol), Cu(OAc)<sub>2</sub>·H<sub>2</sub>O (0.02 mmol, 4.0 mg), FeCl<sub>3</sub>·6H<sub>2</sub>O (0.01 mmol, 2.7 mg) and water (2 mL) were added. The aqueous suspension was stirred at 50 °C (oil bath) until consumption of the starting material (TLC check). Then, the reaction mixture was diluted with brine and extracted with ethyl acetate (3 x 10 mL). The organic phase was dried over anhydrous sodium sulphate and the solvent was removed under vacuum. The crude product was purified by crystallization or by flash chromatography on silica gel (cyclohexane/ethyl acetate) to give the corresponding product **2** (52-99% yields).

### 3.3 Characterization of products

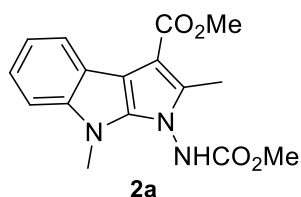

**Methyl 1-((methoxycarbonyl)amino)-2,8-dimethyl-1,8-dihydropyrrolo[2,3-*b*]indole-3-carboxylate (**2a**)**<sup>2</sup>: compound **2a** was obtained by simple extraction with ethyl acetate and crystallization from diethyl ether in 99% yield (62.8 mg), 3 h; pale brown solid; The chemical-physical data of compound **2a** are in

agreement with those reported.<sup>2</sup> mp: 164–166 °C; <sup>1</sup>H NMR (400 MHz, DMSO-*d*<sub>6</sub>)  $\delta$  10.99 (br, 1H), 7.93 (dd, *J* = 8.0 Hz, 0.8 Hz, 1H), 7.44 (d, *J* = 8.0 Hz, 1H), 7.19–7.14 (m, 1H), 7.12–7.08 (m, 1H), 3.89 (s, 3H), 3.79 (s, 6H), 2.48 (s, 3H); <sup>13</sup>C NMR (100 MHz, DMSO-*d*<sub>6</sub>)  $\delta$  165.1, 156.2, 139.7, 136.5, 136.3, 120.6, 120.1, 119.7, 119.2, 109.5, 102.7, 102.1, 53.3, 50.9, 29.1, 10.2; HRMS (ESI-Orbitrap, *m/z*): [M+H]<sup>+</sup> Calcd for C<sub>16</sub>H<sub>18</sub>N<sub>3</sub>O<sub>4</sub> 316.1292; Found 316.1288.

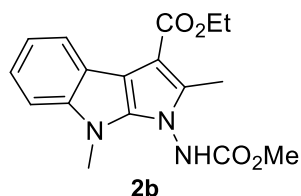

**Ethyl 1-((methoxycarbonyl)amino)-2,8-dimethyl-1,8-dihydropyrrolo[2,3-*b*]indole-3-carboxylate (**2b**)**: compound **2b** was isolated by column chromatography (ethyl acetate/cyclohexane 40:60) in 71% yield (46.6 mg); 4 h; whitish solid; mp: 149–151 °C; <sup>1</sup>H NMR (400 MHz, DMSO-*d*<sub>6</sub>)  $\delta$  11.04 (br, 1H), 7.96 (d, *J* = 8.0 Hz, 1H), 7.45 (d, *J* = 8.0 Hz, 1H), 7.18–7.14 (m, 1H), 7.12–7.08 (m, 1H), 4.36 (q, *J* = 7.2 Hz, 2H), 3.81 (s, 3H), 3.79 (s, 3H), 2.49 (s, 3H), 1.42 (t, *J* = 7.2 Hz, 3H). <sup>13</sup>C NMR (100 MHz, DMSO-*d*<sub>6</sub>)  $\delta$  164.6, 156.2, 139.7, 136.5, 136.6, 120.5, 120.1, 119.7, 119.1, 109.5, 102.6, 102.4, 59.3,

## ELECTRONIC SUPPORTING INFORMATION

53.2, 29.1, 14.6, 10.2. HRMS (ESI-Orbitrap,  $m/z$ ):  $[M+H]^+$  calcd for  $C_{17}H_{19}N_3O_4$  330.1448, found 330.1452.

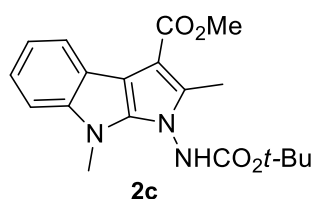

**Methyl** **1-((*tert*-butoxycarbonyl)amino)-2,8-dimethyl-1,8-dihydropyrrolo[2,3-*b*]indole-3-carboxylate (2c):** compound **2c** was isolated by simple extraction with ethyl acetate and crystallization from diethyl ether/petroleum ether in 92% yield (66.0 mg); 4 h; whitish solid; mp: 179–180 ;

$^1H$  NMR (400 MHz, DMSO- $d_6$ )  $\delta$  10.73 (br, 1H), 7.92 (d,  $J = 7.2$  Hz, 1H), 7.44 (d,  $J = 8.0$  Hz, 1H), 7.18–7.14 (m, 1H), 7.11–7.07 (m, 1H), 3.89 (s, 3H), 3.79 (s, 3H), 2.47 (s, 3H), 1.51 (s, 9H).  $^{13}C$  NMR (100 MHz, DMSO- $d_6$ )  $\delta$  165.1, 154.7, 139.7, 136.5, 136.4, 120.5, 120.1, 119.6, 119.1, 109.4, 102.5, 101.8, 81.5, 50.8, 29.0, 27.8, 10.2. HRMS (ESI-Orbitrap,  $m/z$ ):  $[M+H]^+$  calcd for  $C_{19}H_{23}N_3O_4$  358.1761, found 358.1752.

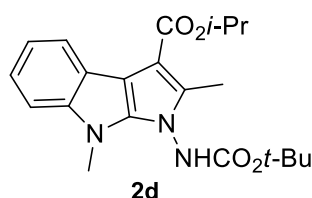

**Isopropyl** **1-((*tert*-butoxycarbonyl)amino)-2,8-dimethyl-1,8-dihydropyrrolo[2,3-*b*]indole-3-carboxylate (2d):** compound **2d** was obtained by simple extraction with ethyl acetate and crystallization from diethyl ether/petroleum ether in 97% yield (74.5 mg); 12 h; pale grey solid; mp: 152–

154 °C;  $^1H$  NMR (400 MHz, DMSO- $d_6$ )  $\delta$  10.73 (br, 1H), 7.96 (d,  $J = 7.6$  Hz, 1H), 7.43 (d,  $J = 7.6$  Hz, 1H), 7.17–7.07 (m, 2H), 5.19 (sept,  $J = 6.4$  Hz, 2H), 3.79 (s, 3H), 2.45 (s, 3H), 1.51 (s, 3H), 1.40 (d,  $J = 6.0$  Hz, 6H).  $^{13}C$  NMR (100 MHz, DMSO- $d_6$ )  $\delta$  164.2, 154.7, 139.7, 136.5, 136.4, 120.4, 120.2, 119.7, 119.1, 109.4, 102.7, 102.6, 81.5, 66.4, 29.0, 27.8, 22.2, 10.4. HRMS (ESI-Orbitrap,  $m/z$ ):  $[M+H]^+$  calcd for  $C_{21}H_{27}N_3O_4$  386.2074, found 386.2077.

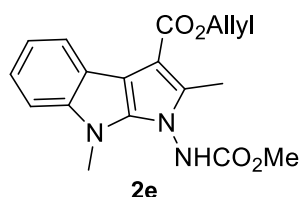

**Allyl** **1-((methoxycarbonyl)amino)-2,8-dimethyl-1,8-dihydropyrrolo[2,3-*b*]indole-3-carboxylate (2e):** compound **2e** was isolated by column chromatography (ethyl acetate/cyclohexane 40:60) in 64% yield (49.2 mg); 20 h; white solid; mp: 134–136 °C;  $^1H$  NMR (400 MHz, DMSO- $d_6$ )  $\delta$  11.06 (br, 1H),

7.94 (d,  $J = 8.0$  Hz, 1H), 7.45 (d,  $J = 8.0$  Hz, 1H), 7.18–7.14 (m, 1H), 7.10–7.06 (m, 1H), 6.19–6.10 (m, 1H), 5.46–5.40 (m, 1H), 5.32–5.29 (m, 1H), 4.87–4.86 (m, 2H), 3.80 (s, 3H), 3.79 (s, 3H), 2.49 (s, 3H);  $^{13}C$  NMR (100 MHz, DMSO- $d_6$ )  $\delta$  164.2, 156.2, 139.7, 136.7, 136.3, 133.4, 120.6, 120.0, 119.7, 119.1, 117.9, 109.5, 102.6, 102.0, 63.9, 53.3, 29.1, 10.2. HRMS (ESI-Orbitrap,  $m/z$ ):  $[M+H]^+$  calcd for  $C_{18}H_{19}N_3O_4$  342.1448, found 342.1450.

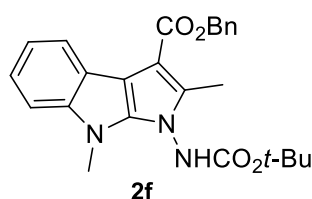

**Benzyl** **1-((*tert*-butoxycarbonyl)amino)-2,8-dimethyl-1,8-dihydropyrrolo[2,3-*b*]indole-3-carboxylate (2f):** compound **2f** was obtained by simple extraction with ethyl acetate and crystallization from ethyl acetate/diethyl ether in 85% yield (74.1 mg); 20 h at 50 °C then 24 h to 70 °C;

## ELECTRONIC SUPPORTING INFORMATION

brown solid; mp: 188–190 °C;  $^1\text{H}$  NMR (400 MHz,  $\text{DMSO-}d_6$ )  $\delta$  10.76 (br, 1H), 7.77 (d,  $J = 7.6$  Hz, 1H), 7.50 (m, 2H), 7.43–7.40 (m, 3H), 7.38–7.34 (m, 1H), 7.11 (t,  $J = 7.6$  Hz, 1H), 6.93 (t,  $J = 7.6$  Hz, 1H), 5.41 (s, 2H), 3.78 (s, 3H), 2.47 (s, 3H), 1.50 (s, 9H).  $^{13}\text{C}$  NMR (100 MHz,  $\text{DMSO-}d_6$ )  $\delta$  164.4, 154.6, 139.6, 136.9, 136.8, 136.4, 128.5, 128.1, 127.9, 120.4, 120.0, 119.8, 119.0, 109.3, 102.6, 101.9, 81.5, 64.9, 29.0, 27.8, 10.2. HRMS (ESI-Orbitrap,  $m/z$ ):  $[\text{M}+\text{H}]^+$  calcd for  $\text{C}_{25}\text{H}_{27}\text{N}_3\text{O}_4$  434.2074, found 434.2082.

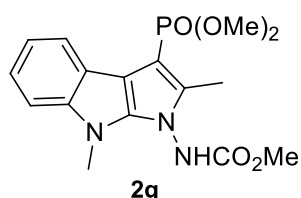

**Methyl (3-(dimethoxyphosphoryl)-2,8-dimethylpyrrolo[2,3-*b*]indol-1(8H)-yl)carbamate (2g):** compound **2g** was obtained by simple extraction with ethyl acetate and crystallization from ethyl acetate/petroleum ether in 99% yield (72.5 mg); 12 h; brown solid; mp: 184–186 °C;  $^1\text{H}$  NMR (400 MHz,  $\text{DMSO-}d_6$ )

$\delta$  10.98 (br, 1H), 7.74 (d,  $J = 8.0$  Hz, 1H), 7.45 (d,  $J = 8.0$  Hz, 1H), 7.17–7.13 (m, 1H), 7.08 (t,  $J = 7.2$  Hz, 1H), 3.80 (s, 3H), 3.78 (s, 3H), 3.65 (d,  $^3J_{\text{HP}} = 8.4$  Hz, 3H), 3.62 (d,  $^3J_{\text{HP}} = 8.4$  Hz, 3H), 2.40 (s, 3H).  $^{13}\text{C}$  NMR (100 MHz,  $\text{DMSO-}d_6$ )  $\delta$  156.3, 139.6, 137.8 (d,  $^2J_{\text{CP}} = 26.2$  Hz), 137.0 (d,  $^2J_{\text{CP}} = 14.7$  Hz), 120.5, 119.7, 119.3, 118.6, 109.6, 104.2 (d,  $^2J_{\text{CP}} = 11.0$  Hz), 93.4 (d,  $^1J_{\text{CP}} = 215$  Hz), 53.2, 51.8, 51.7, 29.1, 10.2. HRMS (ESI-Orbitrap,  $m/z$ ):  $[\text{M}+\text{H}]^+$  calcd for  $\text{C}_{16}\text{H}_{20}\text{N}_3\text{O}_5\text{P}$  366.1213, found 366.1216.

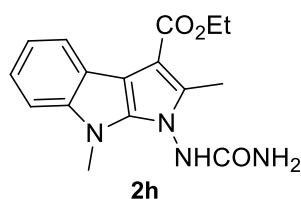

**Ethyl 2,8-dimethyl-1-ureido-1,8-dihydropyrrolo[2,3-*b*]indole-3-carboxylate (2h):** compound **2h** was obtained by simple extraction with ethyl acetate and crystallization from diethyl ether in 85% yield (53.2 mg); 36 h; grey solid; mp: 240–242 °C;  $^1\text{H}$  NMR (400 MHz,  $\text{DMSO-}d_6$ )  $\delta$  9.55 (br, 1H), 7.95 (d,

$J = 7.6$  Hz, 1H), 7.42 (d,  $J = 7.6$  Hz, 1H), 7.13 (t,  $J = 7.2$  Hz, 1H), 7.07 (t,  $J = 7.2$  Hz, 1H), 6.55 (br, 2H), 4.35 (q,  $J = 6.8$  Hz, 2H), 3.80 (s, 3H), 2.48 (s, 3H), 1.41 (t,  $J = 6.8$  Hz, 3H).  $^{13}\text{C}$  NMR (100 MHz,  $\text{DMSO-}d_6$ )  $\delta$  164.8, 157.6, 139.6, 137.3, 137.0, 120.3, 120.2, 119.6, 118.9, 109.3, 102.4, 101.9, 59.1, 29.0, 14.7, 10.4. HRMS (ESI-Orbitrap,  $m/z$ ):  $[\text{M}+\text{H}]^+$  calcd for  $\text{C}_{16}\text{H}_{18}\text{N}_4\text{O}_3$  315.1452, found 315.1454.

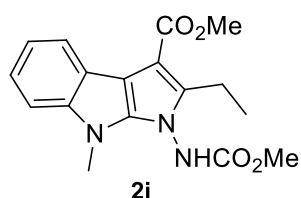

**Methyl 2-ethyl-1-((methoxycarbonyl)amino)-8-methyl-1,8-dihydropyrrolo[2,3-*b*]indole-3-carboxylate (2i):** compound **2i** was isolated by column chromatography (ethyl acetate/cyclohexane 30:70) in 80% yield (52.6 mg); 4 h; pale yellow solid; mp: 188–190 °C;  $^1\text{H}$  NMR (400 MHz,  $\text{DMSO-}d_6$ )

$\delta$  11.10 (br, 1H), 7.94 (d,  $J = 8.0$  Hz, 1H), 7.45 (d,  $J = 8.0$  Hz, 1H), 7.19–7.15 (m, 1H), 7.12–7.08 (m, 1H), 3.90 (s, 3H), 3.81 (s, 3H), 3.78 (s, 3H), 3.06–2.97 (m, 1H), 2.87–2.78 (m, 1H), 1.14 (t,  $J = 7.4$  Hz, 3H).  $^{13}\text{C}$  NMR (100 MHz,  $\text{DMSO-}d_6$ )  $\delta$  164.8, 156.4, 142.3, 139.8, 136.2, 120.6, 120.1, 119.7, 119.1, 109.4, 102.7, 101.3, 53.2, 50.8, 29.0, 17.5, 14.0. HRMS (ESI-Orbitrap,  $m/z$ ):  $[\text{M}+\text{H}]^+$  calcd for  $\text{C}_{17}\text{H}_{19}\text{N}_3\text{O}_4$  330.1448, found 330.1441.

## ELECTRONIC SUPPORTING INFORMATION

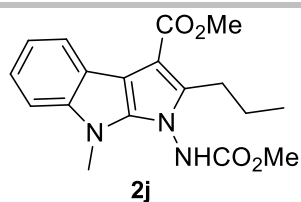

**Methyl 1-((methoxycarbonyl)amino)-8-methyl-2-propyl-1,8-dihydropyrrolo[2,3-*b*]indole-3-carboxylate (2j):** compound **2j** was isolated by column chromatography (ethyl acetate/cyclohexane 30:70) in 85% yield (58.7 mg); 12 h; pale yellow solid; mp: 122–124 °C; <sup>1</sup>H NMR (400 MHz, DMSO-*d*<sub>6</sub>) δ 11.07 (br, 1H), 7.94 (d, *J* = 8.0 Hz, 1H), 7.45 (d, *J* = 8.0 Hz, 1H), 7.19–7.15 (m, 1H), 7.12–7.08 (m, 1H), 3.90 (s, 3H), 3.81 (s, 3H), 3.78 (s, 3H), 3.04–2.97 (m, 1H), 2.83–2.76 (m, 1H), 1.65–1.50 (m, 2H), 0.93 (t, *J* = 7.2 Hz, 3H). <sup>13</sup>C NMR (100 MHz, DMSO-*d*<sub>6</sub>) δ 164.9, 156.3, 140.8, 139.8, 136.3, 120.6, 120.1, 119.7, 119.1, 109.4, 102.7, 101.9, 53.2, 50.8, 29.0, 25.9, 22.4, 13.7. HRMS (ESI-Orbitrap, *m/z*): [M+H]<sup>+</sup> calcd for C<sub>18</sub>H<sub>21</sub>N<sub>3</sub>O<sub>4</sub> 344.1605, found 344.1609.

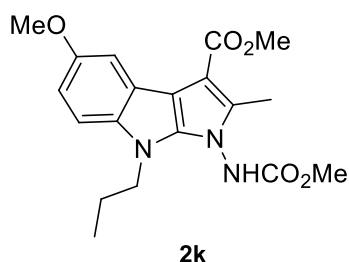

**Methyl 5-methoxy-1-((methoxycarbonyl)amino)-2-methyl-8-propyl-1,8-dihydropyrrolo[2,3-*b*]indole-3-carboxylate (2k):** compound **2k** was isolated by column chromatography (ethyl acetate/cyclohexane 40:60) in 99% yield (73.9 mg); 6 h; whitish solid; mp: 186–188 °C; <sup>1</sup>H NMR (400 MHz, DMSO-*d*<sub>6</sub>) δ 11.02 (br, 1H), 7.45 (d, *J* = 2.4 Hz, 1H), 7.36 (d, *J* = 8.8 Hz, 1H), 6.77 (dd, *J* = 8.8, 2.4 Hz, 1H), 4.23–4.04 (m, 2H), 3.89 (s, 3H), 3.79 (s, 6H), 2.46 (s, 3H), 1.75–1.58 (m, 2H), 0.82 (t, *J* = 7.4 Hz, 3H). <sup>13</sup>C NMR (100 MHz, DMSO-*d*<sub>6</sub>) δ 165.0, 156.1, 153.3, 136.6, 136.4, 134.3, 120.5, 110.3, 109.0, 103.1, 102.8, 102.1, 55.3, 53.1, 50.8, 44.3, 23.1, 11.1, 10.2. HRMS (ESI-Orbitrap, *m/z*): [M+H]<sup>+</sup> calcd for C<sub>19</sub>H<sub>23</sub>N<sub>3</sub>O<sub>5</sub> 374.1710, found 374.1715.

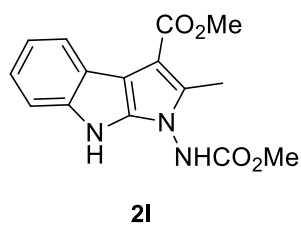

**Methyl 1-((methoxycarbonyl)amino)-2-methyl-1,8-dihydropyrrolo[2,3-*b*]indole-3-carboxylate (2l)<sup>2</sup>:** compound **2l** was isolated by column chromatography (ethyl acetate/cyclohexane 55:45) in 52% yield (31.1 mg); 12 h; white solid; for compound **2l**, a spontaneous ring enlargement reaction to azacarboline was observed<sup>2</sup>; <sup>1</sup>H NMR (400 MHz, DMSO-*d*<sub>6</sub>) δ 11.50 (br, 1H), 10.88 (br, 1H), 7.90–7.88 (m, 1H), 7.34–7.32 (m, 1H), 7.10–7.02 (m, 2H), 3.89 (s, 3H), 3.78 (s, 3H), 2.48 (s, 3H). <sup>13</sup>C NMR (100 MHz, DMSO-*d*<sub>6</sub>) δ 165.2, 155.7, 138.6, 137.3, 135.6, 120.9, 120.3, 119.5, 118.8, 111.7, 102.4, 102.0, 52.9, 50.7, 10.3. HRMS (ESI-Orbitrap, *m/z*): [M+H]<sup>+</sup> calcd for C<sub>15</sub>H<sub>15</sub>N<sub>3</sub>O<sub>4</sub> 302.1135, found 302.1131.

During the course of the reaction, the following work-up, and the long standing in the presence or absence of DMSO-*d*<sub>6</sub> solution, the compound **2l** gives a partial conversion to azacarboline **5a**.

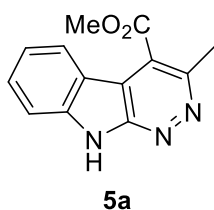

**Methyl 3-methyl-9H-pyridazino[3,4-*b*]indole-4-carboxylate (5a):** The chemical-physical data of compound **5a** are in agreement with those reported.<sup>2</sup>

## ELECTRONIC SUPPORTING INFORMATION

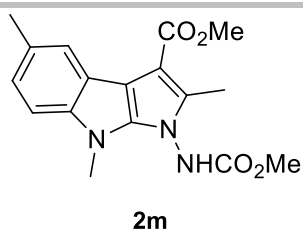

**Methyl 1-((methoxycarbonyl)amino)-2,5,8-trimethyl-1,8-dihydropyrrolo[2,3-*b*]indole-3-carboxylate (2m):** compound **2m** was isolated by column chromatography (ethyl acetate/cyclohexane 40:60) in 93% yield (61.4 mg); 5 h; pale brown solid; mp: 201–203 °C; <sup>1</sup>H NMR (400 MHz, DMSO-*d*<sub>6</sub>) δ 11.00 (br, 1H), 7.72 (s, 1H), 7.32 (d, *J* = 8.4 Hz, 1H), 6.98 (dd, *J* = 8.4, 1.2 Hz, 1H), 3.89 (s, 3H), 3.80 (s, 3H), 3.74 (s, 3H), 2.47 (s, 3H), 2.42 (s, 3H). <sup>13</sup>C NMR (100 MHz, DMSO-*d*<sub>6</sub>) δ 165.1, 156.2, 138.2, 136.5, 136.2, 127.6, 121.8, 120.2, 119.7, 109.1, 102.4, 102.1, 53.2, 50.8, 29.1, 21.3, 10.2. HRMS (ESI-Orbitrap, *m/z*): [M+H]<sup>+</sup> calcd for C<sub>17</sub>H<sub>19</sub>N<sub>3</sub>O<sub>4</sub> 330.1448, found 330.1449.

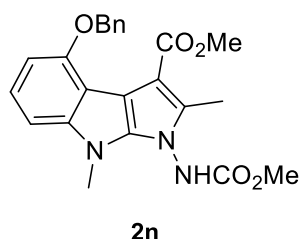

**Methyl 4-(benzyloxy)-1-((methoxycarbonyl)amino)-2,8-dimethyl-1,8-dihydropyrrolo[2,3-*b*]indole-3-carboxylate (2n):** compound **2n** was obtained by simple extraction with ethyl acetate/diethyl ether and crystallization from ethyl acetate/diethyl ether in 96% yield (80.7 mg); 48 h; whitish solid; mp: 150–152 °C; <sup>1</sup>H NMR (400 MHz, DMSO-*d*<sub>6</sub>) δ 10.98 (br, 1H), 7.49–7.47 (m, 2H), 7.38–7.34 (m, 2H), 7.31–7.27 (m, 1H), 7.05–7.02 (m, 2H), 6.67–6.65 (m, 1H), 5.25 (s, 2H), 3.80 (s, 3H), 3.75 (s, 3H), 3.38 (s, 3H), 2.36 (s, 3H). <sup>13</sup>C NMR (100 MHz, DMSO-*d*<sub>6</sub>) δ 165.8, 156.3, 151.6, 140.9, 138.0, 135.5, 134.3, 128.3, 127.6, 127.5, 121.3, 110.6, 103.9, 102.7, 100.6, 69.3, 53.2, 50.3, 29.3, 10.1. HRMS (ESI-Orbitrap, *m/z*): [M+H]<sup>+</sup> calcd for C<sub>23</sub>H<sub>23</sub>N<sub>3</sub>O<sub>5</sub> 422.1710, found 422.1708.

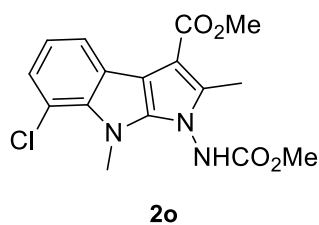

**Methyl 7-chloro-1-((methoxycarbonyl)amino)-2,8-dimethyl-1,8-dihydropyrrolo[2,3-*b*]indole-3-carboxylate (2o):** compound **2o** was obtained by simple extraction with ethyl acetate and crystallization from diethyl ether/petroleum ether in 97% yield (67.6 mg); 24 h; brownish solid; mp: 189–191 °C; <sup>1</sup>H NMR (400 MHz, DMSO-*d*<sub>6</sub>) δ 11.10 (br, 1H), 7.95 (dd, *J* = 7.6, 1.2 Hz, 1H), 7.15 (dd, *J* = 7.6, 1.2 Hz, 1H), 7.08 (t, *J* = 7.2 Hz, 1H), 4.12 (s, 3H), 3.89 (s, 3H), 3.80 (s, 3H). <sup>13</sup>C NMR (100 MHz, DMSO-*d*<sub>6</sub>) δ 164.8, 156.1, 137.9, 137.1, 134.4, 123.4, 122.5, 120.5, 119.0, 115.6, 102.9, 102.0, 53.3, 50.9, 32.2, 10.2. HRMS (ESI-Orbitrap, *m/z*): [M+H]<sup>+</sup> calcd for C<sub>16</sub>H<sub>16</sub>ClN<sub>3</sub>O<sub>4</sub>, 350.0902, found 350.0909.

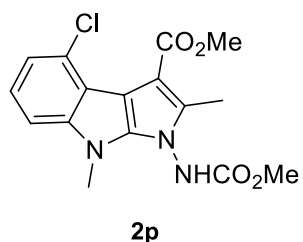

**Methyl 4-chloro-1-((methoxycarbonyl)amino)-2,8-dimethyl-1,8-dihydropyrrolo[2,3-*b*]indole-3-carboxylate (2p):** compound **2p** was obtained by simple extraction with ethyl acetate and crystallization from diethyl ether/petroleum ether in 99% yield (69.1 mg); 2 h; brownish solid; mp: 170–172 °C; <sup>1</sup>H NMR (400 MHz, DMSO-*d*<sub>6</sub>) δ 11.02 (br, 1H), 7.48–7.43 (m, 1H), 7.16–7.11 (m, 2H), 3.81 (s, 6H), 3.78 (s, 3H), 2.34 (s, 3H). <sup>13</sup>C NMR (100 MHz, DMSO-*d*<sub>6</sub>) δ 165.6, 156.3,

## ELECTRONIC SUPPORTING INFORMATION

140.5, 137.0, 134.7, 123.7, 121.1, 120.2, 118.4, 108.4, 104.1, 100.0, 53.3, 50.7, 29.4, 10.0. HRMS (ESI-Orbitrap,  $m/z$ ):  $[M+H]^+$  calcd for  $C_{16}H_{16}ClN_3O_4$ , 350.0902, found 350.0911.

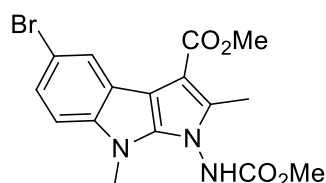

**2q**

**Methyl 5-bromo-1-((methoxycarbonyl)amino)-2,8-dimethyl-1,8-dihydropyrrolo[2,3-*b*]indole-3-carboxylate (2q):** compound **2q** was obtained by simple extraction with ethyl acetate and crystallization from diethyl ether in 98% yield (77.3 mg); 9 h; brownish solid; mp: 194–196 °C;  $^1H$  NMR (400 MHz, DMSO- $d_6$ )  $\delta$  11.07 (br, 1H), 8.02 (d,  $J = 2.0$  Hz, 1H), 7.46 (d,  $J = 8.4$  Hz, 1H), 7.29 (dd,  $J = 8.8, 2.0$  Hz, 1H), 3.89 (s, 3H), 3.79 (s, 6H), 2.48 (s, 3H).  $^{13}C$  NMR (100 MHz, DMSO- $d_6$ )  $\delta$  164.8, 156.2, 138.4, 137.3, 137.0, 122.8, 121.7, 121.5, 111.7, 111.5, 102.0, 53.4, 51.1, 29.3, 10.3. HRMS (ESI-Orbitrap,  $m/z$ ):  $[M+H]^+$  calcd for  $C_{16}H_{16}BrN_3O_4$ , 394.0397, found 394.0404.

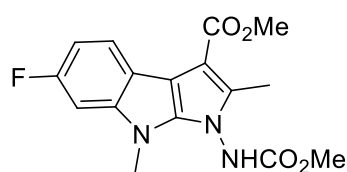

**2r**

**Methyl 6-fluoro-1-((methoxycarbonyl)amino)-2,8-dimethyl-1,8-dihydropyrrolo[2,3-*b*]indole-3-carboxylate (2r):** compound **2r** was obtained by simple extraction with ethyl acetate and crystallization from diethyl ether in 98% yield (65.4 mg); 8 h; brownish solid; mp: 200–202 °C;  $^1H$  NMR (400 MHz, DMSO- $d_6$ )  $\delta$  11.07 (br, 1H), 7.88 (dd,  $J = 8.8$  Hz,  $^4J_{HF} = 6.0$  Hz, 1H), 7.38 (dd,  $^3J_{HF} = 10.8$  Hz,  $J = 2.4$  Hz, 1H), 6.96–6.91 (m, 1H), 3.89 (s, 3H), 3.80 (s, 3H), 3.77 (s, 3H), 2.47 (s, 3H).  $^{13}C$  NMR (100 MHz, DMSO- $d_6$ )  $\delta$  165.0, 158.3 (d,  $^1J_{CF} = 232.4$  Hz), 156.2, 139.8 (d,  $^3J_{CF} = 12.2$  Hz), 136.3, 120.3 (d,  $^3J_{CF} = 9.9$  Hz), 116.8, 106.7 (d,  $^2J_{CF} = 23.4$  Hz), 102.5, 101.9, 96.8 (d,  $^2J_{CF} = 26.9$  Hz), 59.7, 53.3, 50.9, 29.4, 10.1. HRMS (ESI-Orbitrap,  $m/z$ ):  $[M+H]^+$  calcd for  $C_{16}H_{16}FN_3O_4$ , 334.1198, found 334.1201.

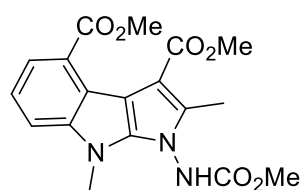

**2s**

**Dimethyl 1-((methoxycarbonyl)amino)-2,8-dimethyl-1,8-dihydropyrrolo[2,3-*b*]indole-3,4-dicarboxylate (2s):** compound **2s** was obtained by simple extraction with ethyl acetate and crystallization from diethyl ether in 99% yield (74.8 mg); 6 h; whitish solid; mp: 210–212 °C;  $^1H$  NMR (400 MHz, DMSO- $d_6$ )  $\delta$  11.04 (br, 1H), 7.68 (d,  $J = 8.0$  Hz, 1H), 7.39 (d,  $J = 8.0$  Hz, 1H), 7.20 (t,  $J = 8.0$  Hz, 1H), 3.83 (s, 3H), 3.81 (s, 3H), 3.75 (s, 3H), 3.72 (s, 3H), 2.36 (s, 3H).  $^{13}C$  NMR (100 MHz, DMSO- $d_6$ )  $\delta$  168.8, 165.4, 156.3, 139.9, 137.8, 135.2, 123.0, 120.4, 119.5, 117.9, 113.0, 104.4, 101.9, 53.3, 51.4, 51.0, 29.2, 10.0. HRMS (ESI-Orbitrap,  $m/z$ ):  $[M+H]^+$  calcd for  $C_{18}H_{19}N_3O_6$ , 374.1347, found 374.1349.



## ELECTRONIC SUPPORTING INFORMATION

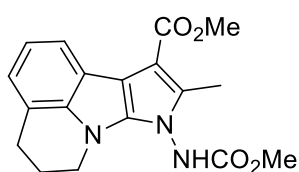

**2t**

**Methyl 8-((methoxycarbonyl)amino)-9-methyl-4,5,6,8-tetrahydropyrrolo[3',2':4,5]pyrrolo[3,2,1-*ij*]quinoline-10-carboxylate (2t):**

compound **2t** was obtained by simple extraction with ethyl acetate and crystallization from diethyl ether in 97% yield (65.9 mg); 4 h; whitish solid; mp: 169–171 °C;  $^1\text{H}$  NMR (400 MHz,  $\text{DMSO-}d_6$ )  $\delta$  11.00 (br, 1H), 7.66 (d,  $J = 7.6$  Hz, 1H), 6.98 (t,  $J = 7.6$  Hz, 1H), 6.87 (d,  $J = 7.2$  Hz, 1H), 4.32–4.27 (m, 1H), 4.09–4.02 (m, 1H), 3.89 (s, 3H), 3.79 (s, 3H), 2.93 (t,  $J = 6.0$  Hz, 2H), 2.48 (s, 3H), 2.18–2.13 (m, 2H).  $^{13}\text{C}$  NMR (100 MHz,  $\text{DMSO-}d_6$ )  $\delta$  165.1, 156.2, 135.9, 135.9, 135.6, 121.5, 119.0, 118.4, 118.1, 117.2, 102.6, 102.1, 53.2, 50.8, 41.2, 23.9, 21.9, 10.1. HRMS (ESI-Orbitrap,  $m/z$ ):  $[\text{M}+\text{H}]^+$  calcd for  $\text{C}_{18}\text{H}_{19}\text{N}_3\text{O}_4$ , 342.1448, found 342.1451.

## ELECTRONIC SUPPORTING INFORMATION

### 4. Recycling of the aqueous catalytic system

Recycling of  $\text{Cu}(\text{OAc})_2 \cdot \text{H}_2\text{O}$ / $\text{FeCl}_3 \cdot 6\text{H}_2\text{O}$ , and water in the intramolecular oxidative cyclization of **1a**.

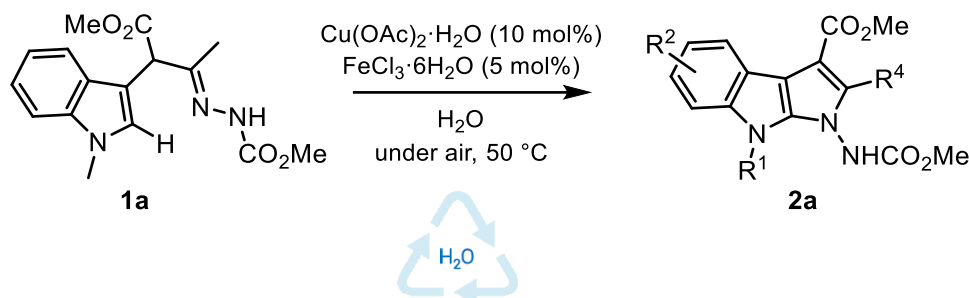

In a round-bottom flask,  $\alpha$ -indolylhydrazone **1a** (0.4 mmol),  $\text{Cu}(\text{OAc})_2 \cdot \text{H}_2\text{O}$  (0.04 mmol, 8.0 mg),  $\text{FeCl}_3 \cdot 6\text{H}_2\text{O}$  (0.02 mmol, 5.4 mg) and water (4 mL) were added. The aqueous suspension was stirred at  $50\text{ }^\circ\text{C}$  (oil bath) until consumption of the starting material (TLC check). At the end, the reaction mixture was extracted with ethyl acetate (3 x 3 mL). The aqueous phase containing the catalyst system was re-used for the five runs with the catalyst activities indicated in the Table S2.

On the other hand, the collected organic phase was dried over anhydrous sodium sulphate and the solvent was removed under vacuum. The crude was purified by crystallization (for the first 3 cycles) or by flash chromatography on silica gel (cyclohexane/ethyl acetate 60:40 for the last 2 cycles) to give the corresponding product **2a** (Table S2).

**Table S2.** Recycling of the aqueous catalytic system.

| Cycle           | Yield (%) | Time (h) |
|-----------------|-----------|----------|
| Fresh           | 99        | 4        |
| 1 <sup>st</sup> | 99        | 4        |
| 2 <sup>nd</sup> | 82        | 6.5      |
| 3 <sup>rd</sup> | 81        | 24       |
| 4 <sup>th</sup> | 74        | 28       |
| 5 <sup>th</sup> | 52        | 48       |

## 5. Synthetic transformations

## 5.1 Access to compound 3

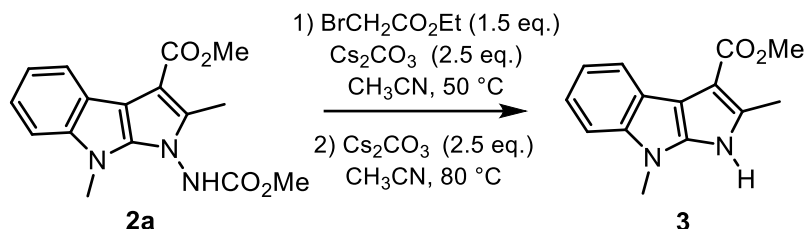

Compound **3** was prepared according to a modified version of the Magnus method.<sup>3</sup> To a solution of **2a** (63.1 mg, 0.2 mmol) in acetonitrile (5 mL), ethyl bromoacetate (0.033 mL, 0.3 mmol) and Cs<sub>2</sub>CO<sub>3</sub> (162.9 mg, 0.5 mmol) were added. The mixture was stirred at 50 °C (oil bath) until the disappearance of the starting material (0.5 h). The solvent was removed under vacuum, water (5 mL) was added and the mixture was extracted with ethyl acetate (3 x 10 mL). The combined organic layer was dried over Na<sub>2</sub>SO<sub>4</sub> and filtered. After the solvent was removed under reduced pressure, the residue was dissolved in acetonitrile (5 mL) and Cs<sub>2</sub>CO<sub>3</sub> (162.9 mg, 0.5 mmol) was added. The mixture was stirred at 80 °C until TLC showed complete consumption of intermediate (1 h). The solvent was removed under vacuum, water (5 mL) was added and the mixture was extracted with ethyl acetate (3 x 10 mL). The collected organic phase was washed with brine, dried over Na<sub>2</sub>SO<sub>4</sub> and filtered. After the solvent was removed under vacuum, the residue was purified by column chromatography (ethyl acetate) to afford compound **3** as a red solid (16.5 mg, 34% yield).

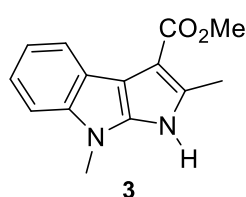

**Methyl 2,8-dimethyl-1,8-dihydropyrrolo[2,3-*b*]indole-3-carboxylate (3):** mp

88–90 °C (dec.); <sup>1</sup>H NMR (400 MHz, CDCl<sub>3</sub>) δ 9.95 (br, 1H), 7.82 (d, *J* = 6.8 Hz, 1H), 7.37–7.30 (m, 3H), 4.02 (s, 3H), 3.71 (s, 3H), 2.34 (s, 3H). <sup>13</sup>C NMR (100 MHz, CDCl<sub>3</sub>) δ 179.8, 169.5, 165.7, 144.8, 135.7, 124.2, 123.8, 123.8, 120.3, 110.4,

101.5, 53.0, 32.9, 24.4. HRMS (ESI-Orbitrap, *m/z*): [M+H]<sup>+</sup> calcd for C<sub>14</sub>H<sub>14</sub>N<sub>2</sub>O<sub>2</sub>, 243.1128, found 234.1121.

## ELECTRONIC SUPPORTING INFORMATION

### 5.2 Access to compound **4**

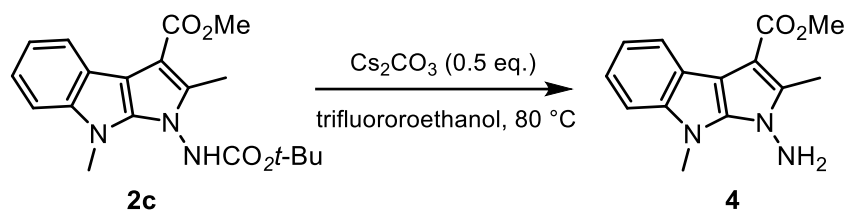

Compound **4** was prepared according to the literature procedure<sup>4</sup>. To a solution of **2c** (357.4 mg, 1.0 mmol) in trifluoroethanol (2 mL), CsOAc (96.0 mg, 0.5 mmol) was added. The mixture was stirred at 80 °C (oil bath) for 24 hours. Upon the completion of reaction (TLC check), the solvent was removed by vacuum and the residue was purified by column chromatography (ethyl acetate/cyclohexane 30:70) to afford compound **4** as a red solid (120.2 mg, 47% yield b.r.s.m.).

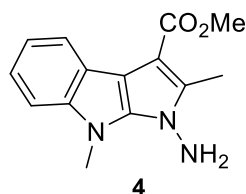

**Methyl 1-amino-2,8-dimethyl-1,8-dihydropyrrolo[2,3-*b*]indole-3-carboxylate**

**(4):** mp 228–230 °C; <sup>1</sup>H NMR (400 MHz, DMSO-*d*<sub>6</sub>) δ 7.91–7.88 (m, 1H), 7.40–7.37 (m, 1H), 7.13–7.03 (m, 2H), 6.04 (s, 2H), 4.01 (s, 3H), 3.86 (s, 3H), 2.63 (s, 3H).

<sup>13</sup>C NMR (100 MHz, DMSO-*d*<sub>6</sub>) δ 165.4, 139.9, 137.5, 137.3, 120.3, 119.9, 119.4,

118.6, 109.1, 102.2, 99.8, 50.5, 29.6, 10.6. HRMS (ESI-Orbitrap, *m/z*): [M+H]<sup>+</sup> calcd for C<sub>14</sub>H<sub>15</sub>N<sub>3</sub>O<sub>2</sub>, 258.1237, found 258.1243.

### 5.3 Access to compound **5b**<sup>2</sup>

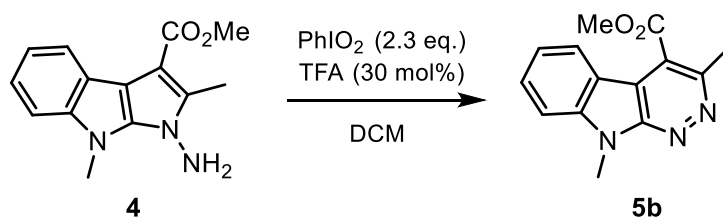

To a solution of compound **4** (48.6 mg, 0.2 mmol) in dichloromethane, PhIO<sub>2</sub> (108.6 mg, 0.46 mmol) and trifluoroacetic acid (0.05 mL, 0.06 mmol) were added. The solution was stirred at room temperature for

## ELECTRONIC SUPPORTING INFORMATION

0.5 hour. After completion of the reaction (TLC check), the solvent was removed under vacuum and the residue was purified by column chromatography (ethyl acetate/cyclohexane 50:50) to afford compound **5b** as a yellow solid (27.6 mg, 54% yield).<sup>2</sup>

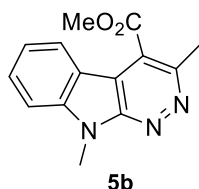

**Methyl 3,9-dimethyl-9H-pyridazino[3,4-b]indole-4-carboxylate: (5b):** The chemical-physical data of compound **5b** are in agreement with those reported.<sup>2</sup>

### 5.4 Access to compound **6**

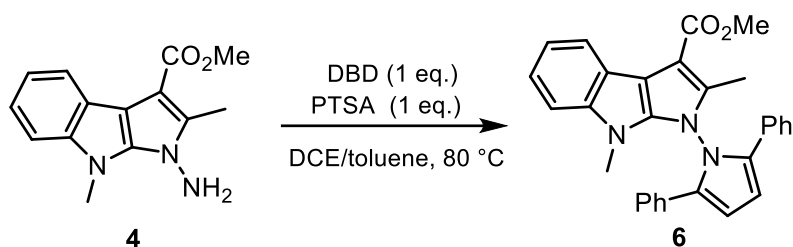

Compound **6** was prepared according to the literature procedure.<sup>5</sup> To a solution of compound **4** (48.6 mg, 0.2 mmol) in dichloroethane/toluene 1:1 (2 mL), 1,4-diphenylbutane-1,4-dione (47.7 mg, 0.2 mmol) and *p*-toluenesulfonic acid (34.4 mg, 0.2 mmol) were added. The solution was heated at 80°C for 48 hours. After the disappearance of the starting material (TLC check), the solvent was removed under vacuum and the residue was purified by column chromatography (ethyl acetate/cyclohexane/dichloromethane 20:80:10) to afford compound **6** as a colorless oil (37.7 mg, 41% yield).

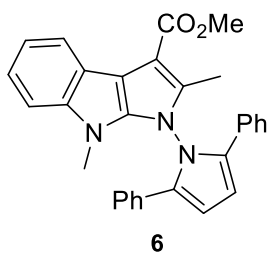

**Methyl 1-(2,5-diphenyl-1H-pyrrol-1-yl)-2,8-dimethyl-1,8-dihydropyrrolo[2,3-b]indole-3-carboxylate(6):** <sup>1</sup>H NMR (400 MHz, DMSO-*d*<sub>6</sub>) δ 7.97–7.95 (m, 1H), 7.83–7.81 (m, 1H), 7.47–7.43 (m, 1H), 7.38–7.36 (m, 1H), 7.25–7.15 (m, 7H), 7.05–7.03 (m, 3H), 6.87 (s, 2H), 3.90 (s, 3H), 3.29 (s, 3H), 2.23 (s, 3H). <sup>13</sup>C NMR (100 MHz, DMSO-*d*<sub>6</sub>) δ 164.7, 152.6, 139.9, 135.2, 135.0, 130.1, 129.8, 129.0, 128.9, 127.7, 127.5, 126.1, 123.4, 121.1, 120.1, 119.9, 119.6, 109.9, 109.2, 108.2, 103.5, 102.9, 51.1, 28.5, 10.3. HRMS (ESI-Orbitrap, *m/z*): [M+H]<sup>+</sup> calcd for C<sub>30</sub>H<sub>25</sub>N<sub>3</sub>O<sub>2</sub>, 460.2020, found 460.2013.

5.5 Access to compound **7**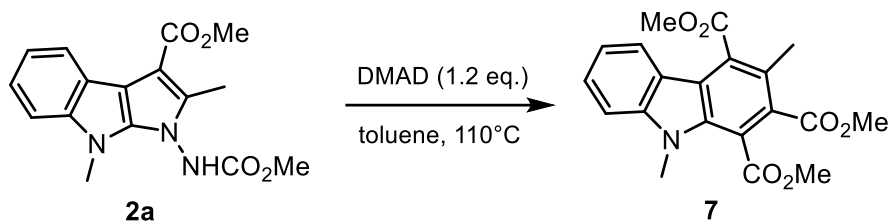

Compound **7** was prepared according to the literature procedure.<sup>6</sup> To a solution of **2a** (94.6 mg, 0.3 mmol) in toluene (1 mL) dimethyl acetylenedicarboxylate (0.049 mL, 0.36 mmol) was added and the reaction mixture was refluxed for 12 hours. After the disappearance of the starting material (TLC check), the solvent was removed under vacuum and the residue was purified by column chromatography (ethyl acetate/cyclohexane 40:60) to afford compound **7** as a red oil (64.3 mg, 58% yield).

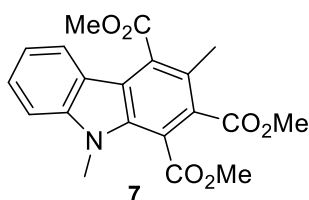

**Trimethyl 3,9-dimethyl-9H-carbazole-1,2,4-tricarboxylate (7):** <sup>1</sup>H NMR (400 MHz, DMSO-*d*<sub>6</sub>) δ 7.76 (d, *J* = 7.6 Hz, 1H), 7.73 (d, *J* = 8.4 Hz, 1H), 7.63–7.58 (m, 1H), 7.32–7.28 (m, 1H), 4.10 (s, 3H), 3.96 (s, 3H), 3.88 (s, 3H), 3.75 (s, 3H), 2.36 (s, 3H). <sup>13</sup>C NMR (100 MHz, DMSO-*d*<sub>6</sub>) δ 168.5, 167.8, 166.8, 142.8, 134.7, 129.9, 129.0, 128.0, 121.7, 121.0, 120.8, 120.5, 118.6, 116.3,

110.3, 53.2, 53.1, 52.8, 31.7, 16.2. HRMS (ESI-Orbitrap, *m/z*): [M+H]<sup>+</sup> calcd for C<sub>20</sub>H<sub>19</sub>NO<sub>6</sub>, 370.1285, found 370.1279.

# ELECTRONIC SUPPORTING INFORMATION

## 6. <sup>1</sup>H and <sup>13</sup>C NMR spectra

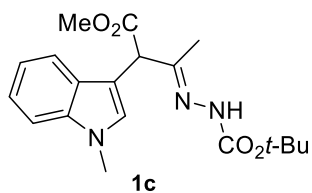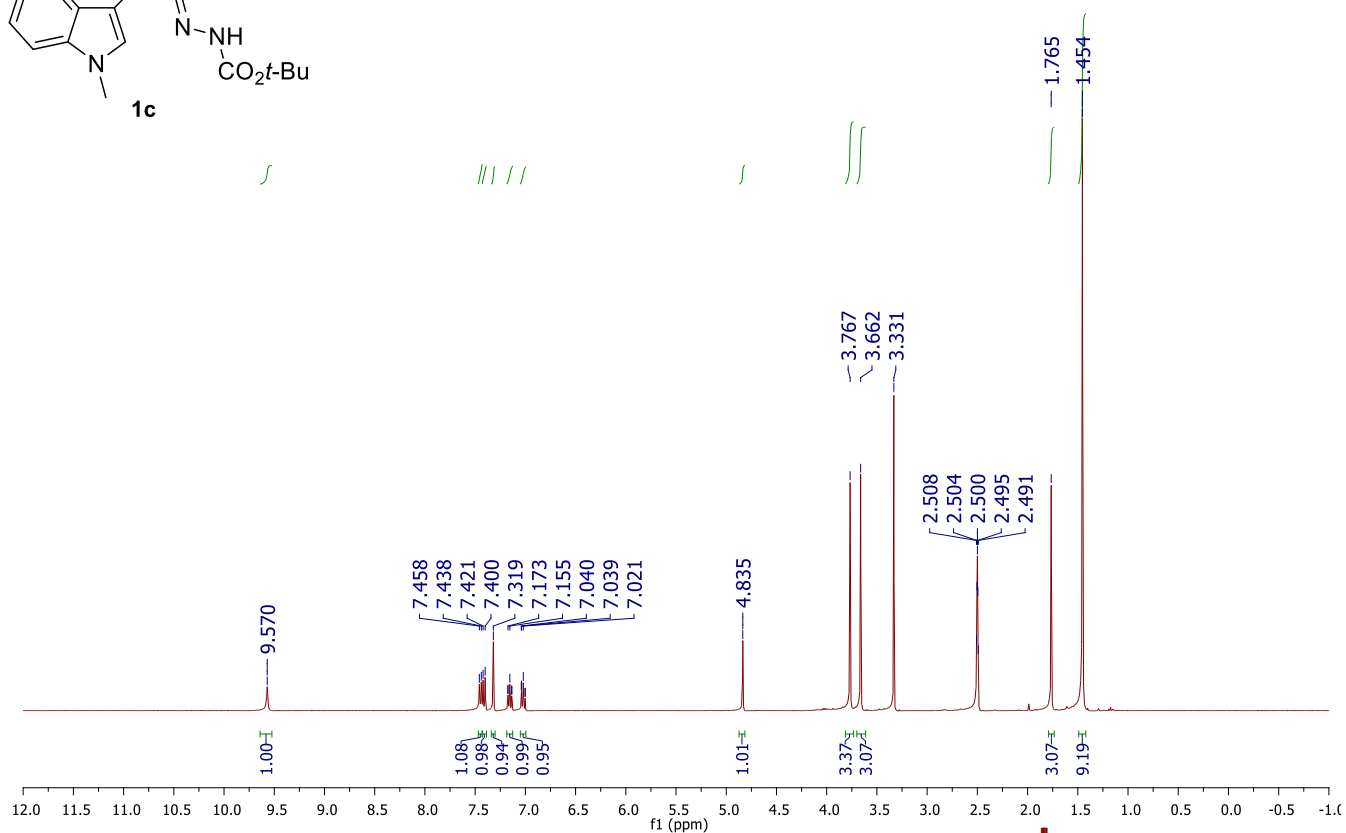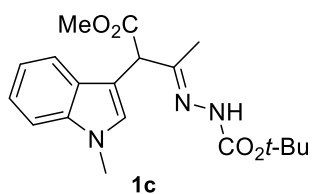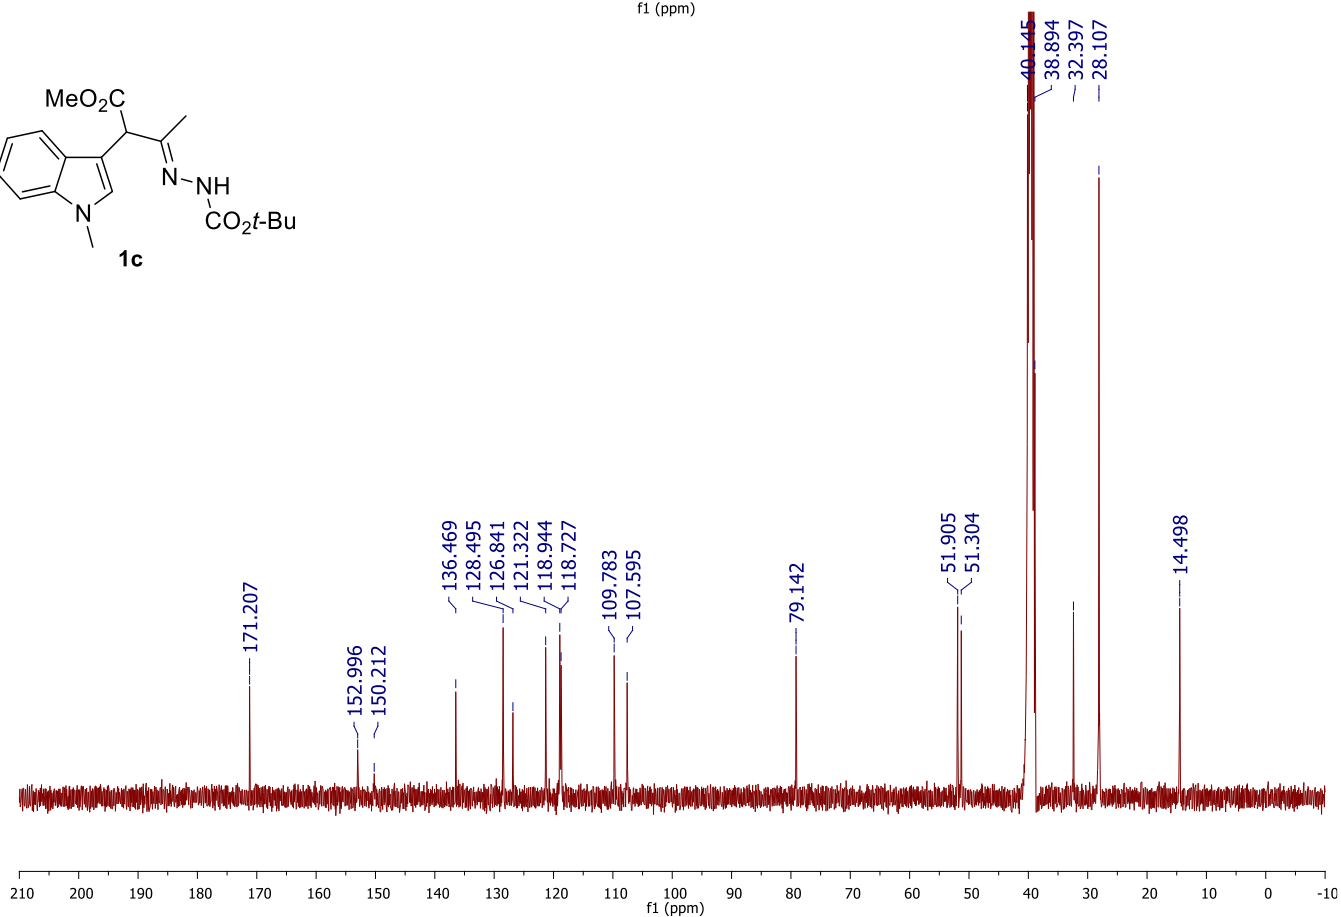

# ELECTRONIC SUPPORTING INFORMATION

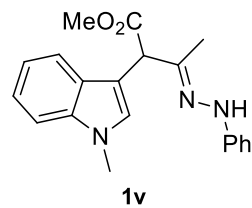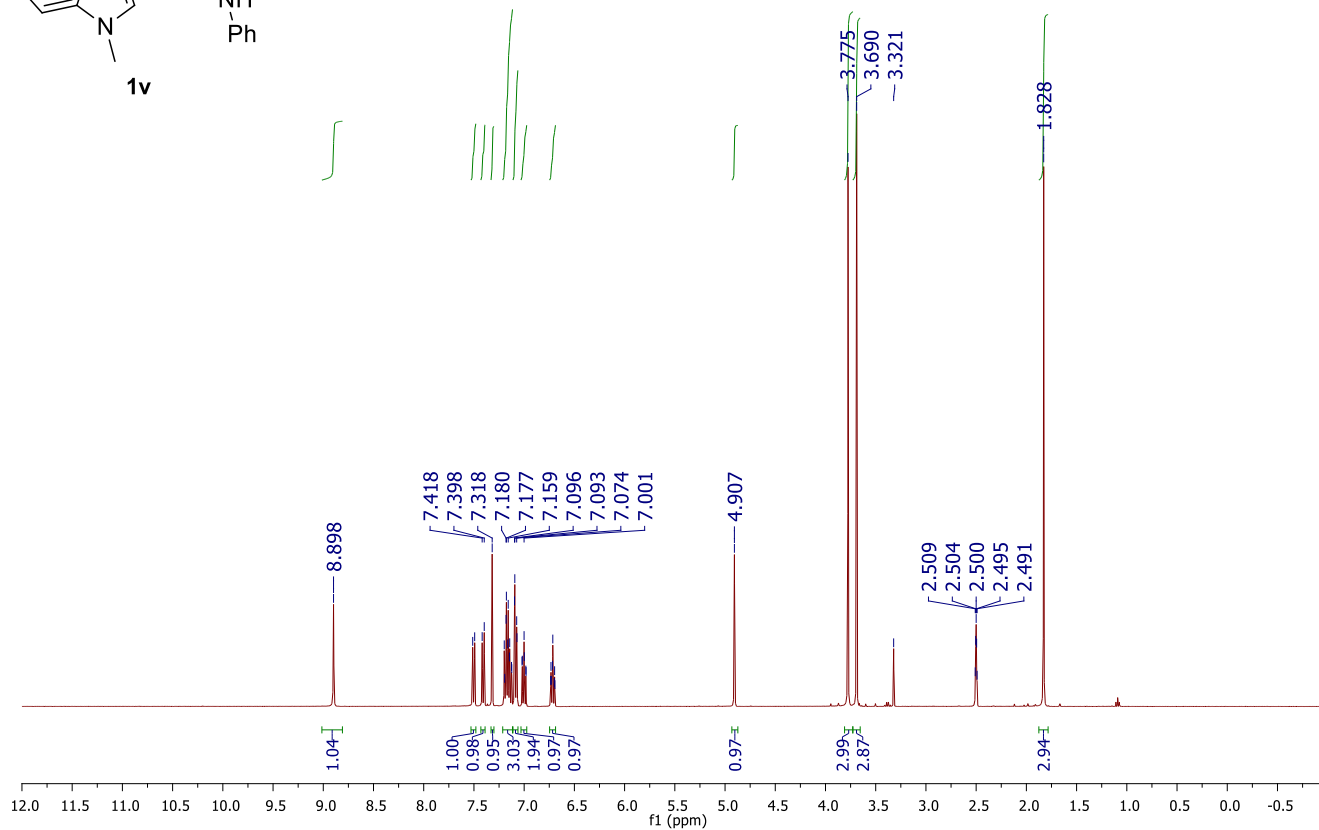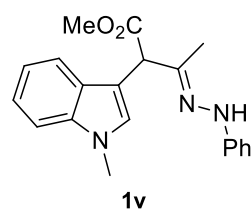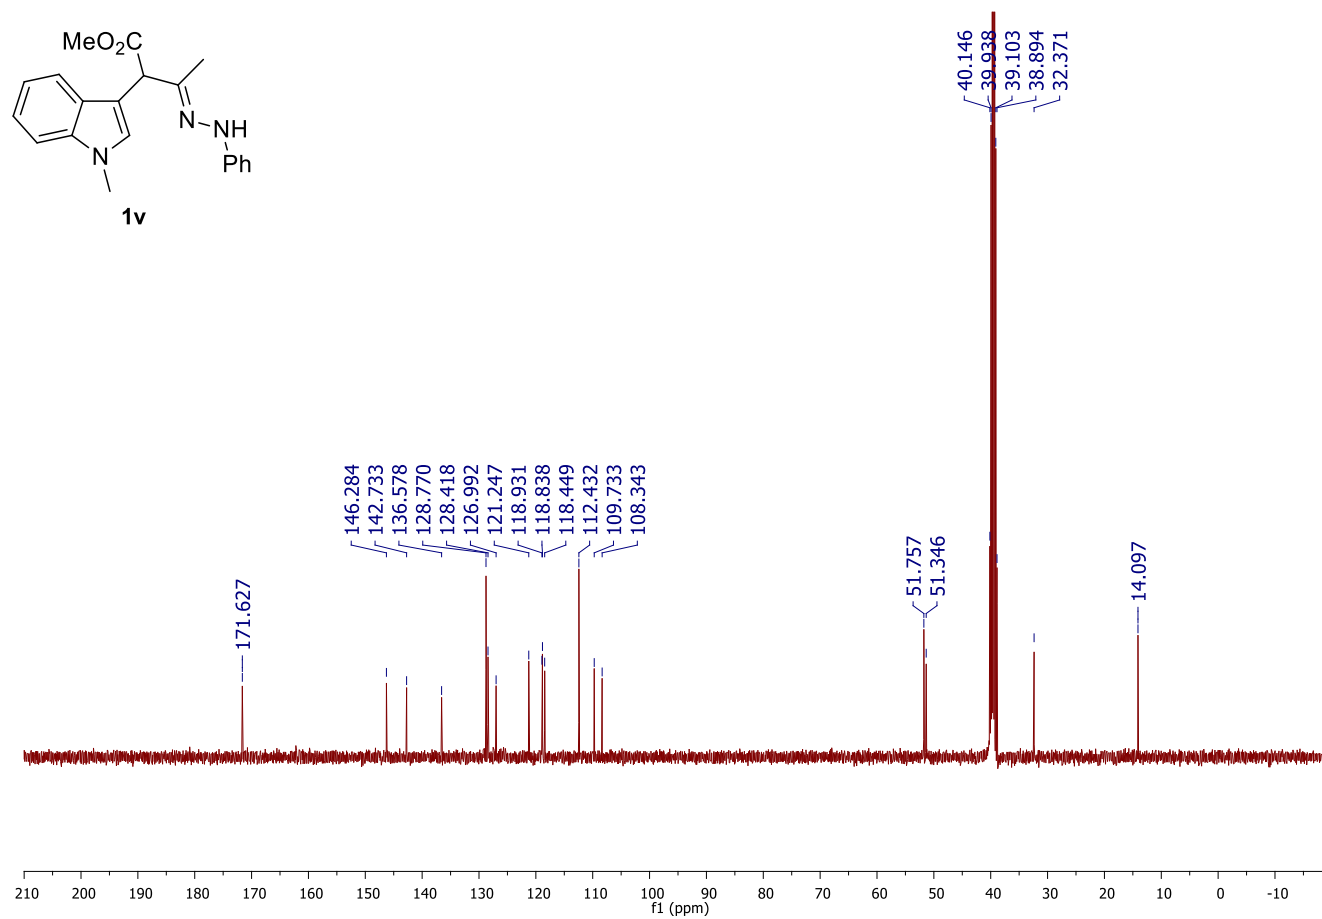



# ELECTRONIC SUPPORTING INFORMATION

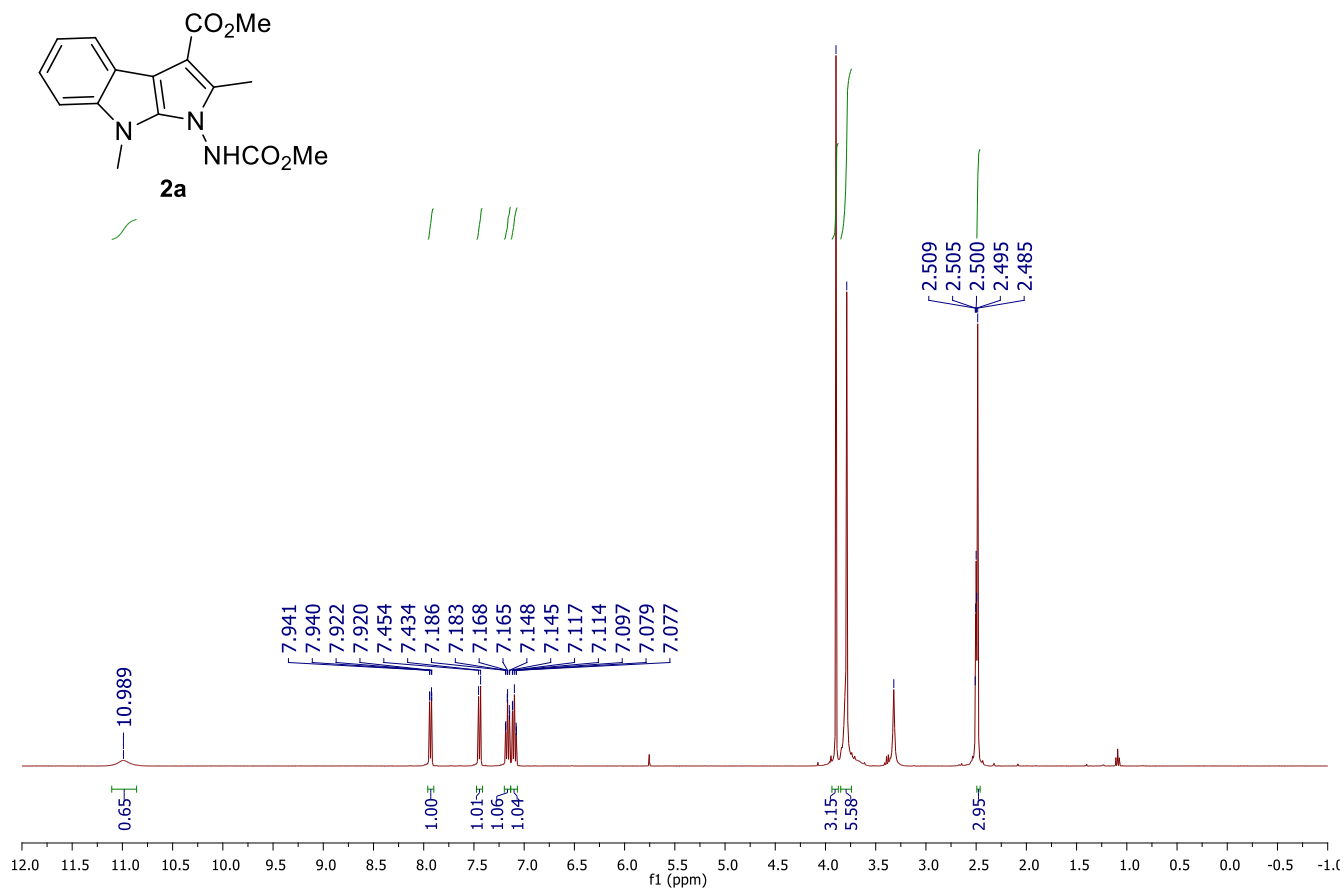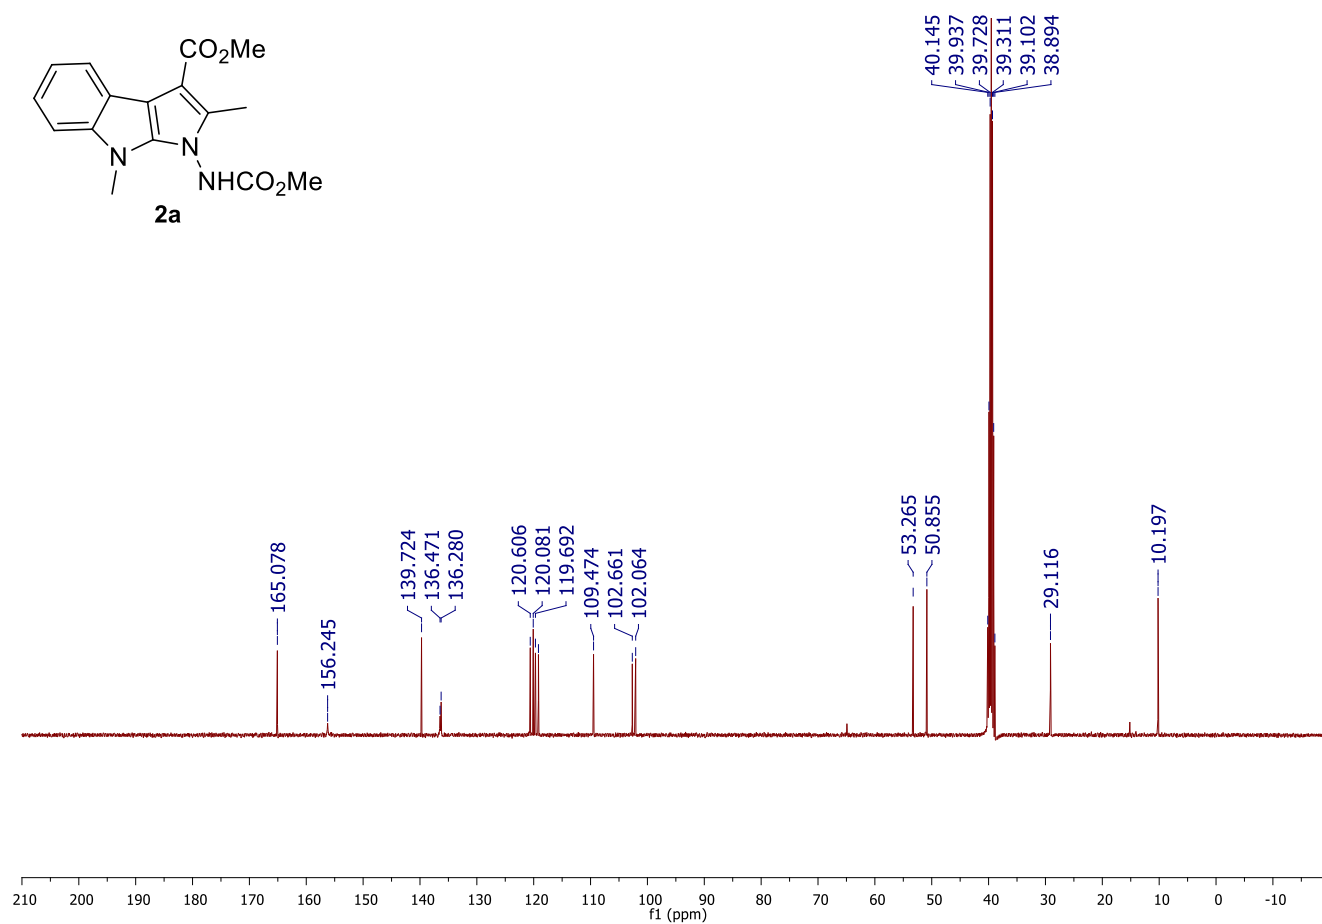

# ELECTRONIC SUPPORTING INFORMATION

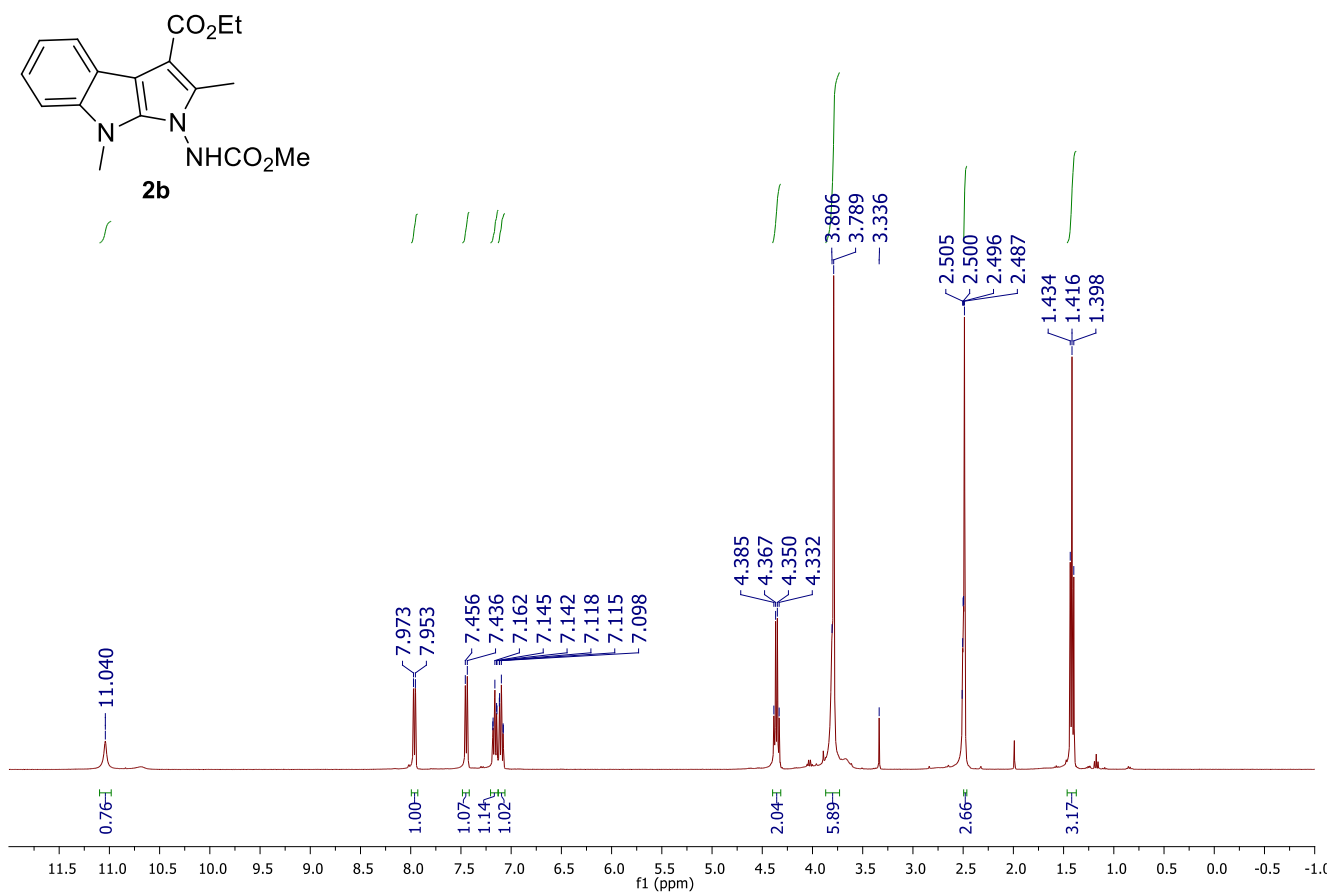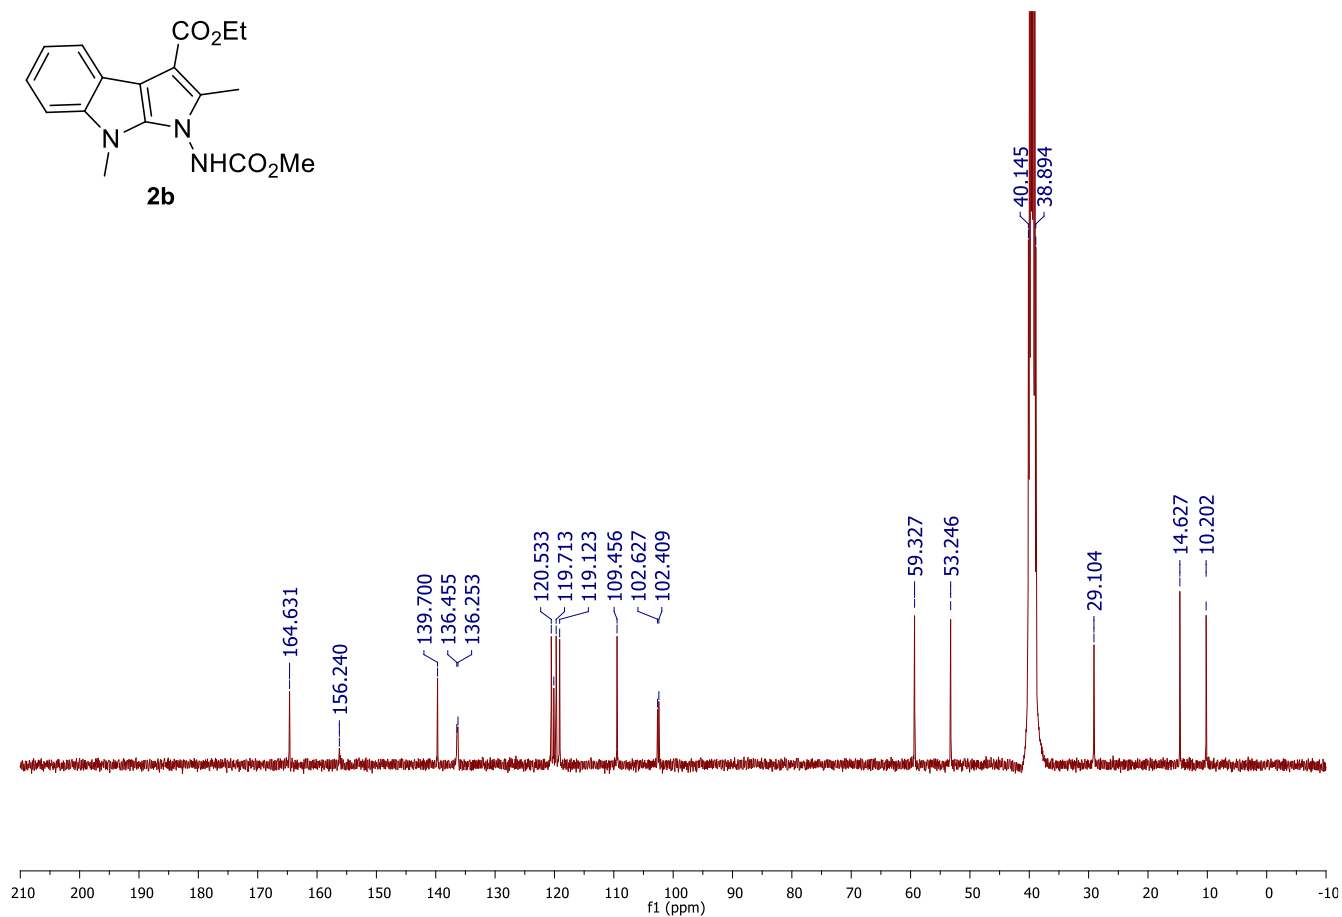

# ELECTRONIC SUPPORTING INFORMATION

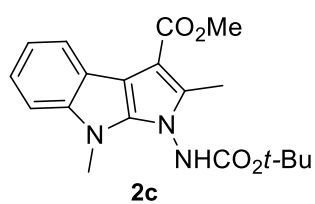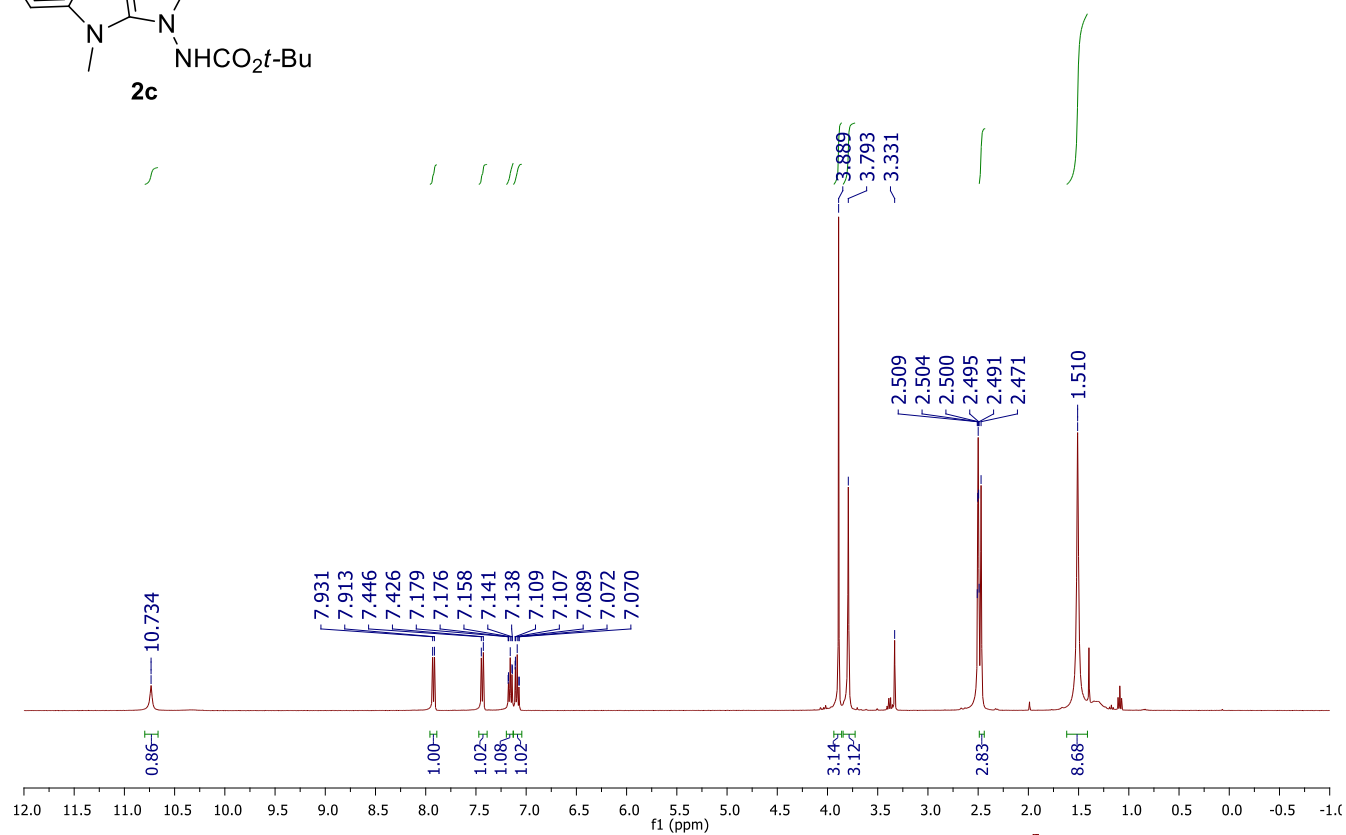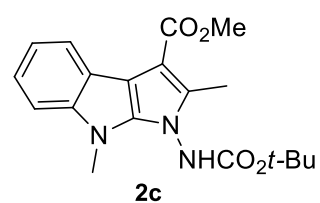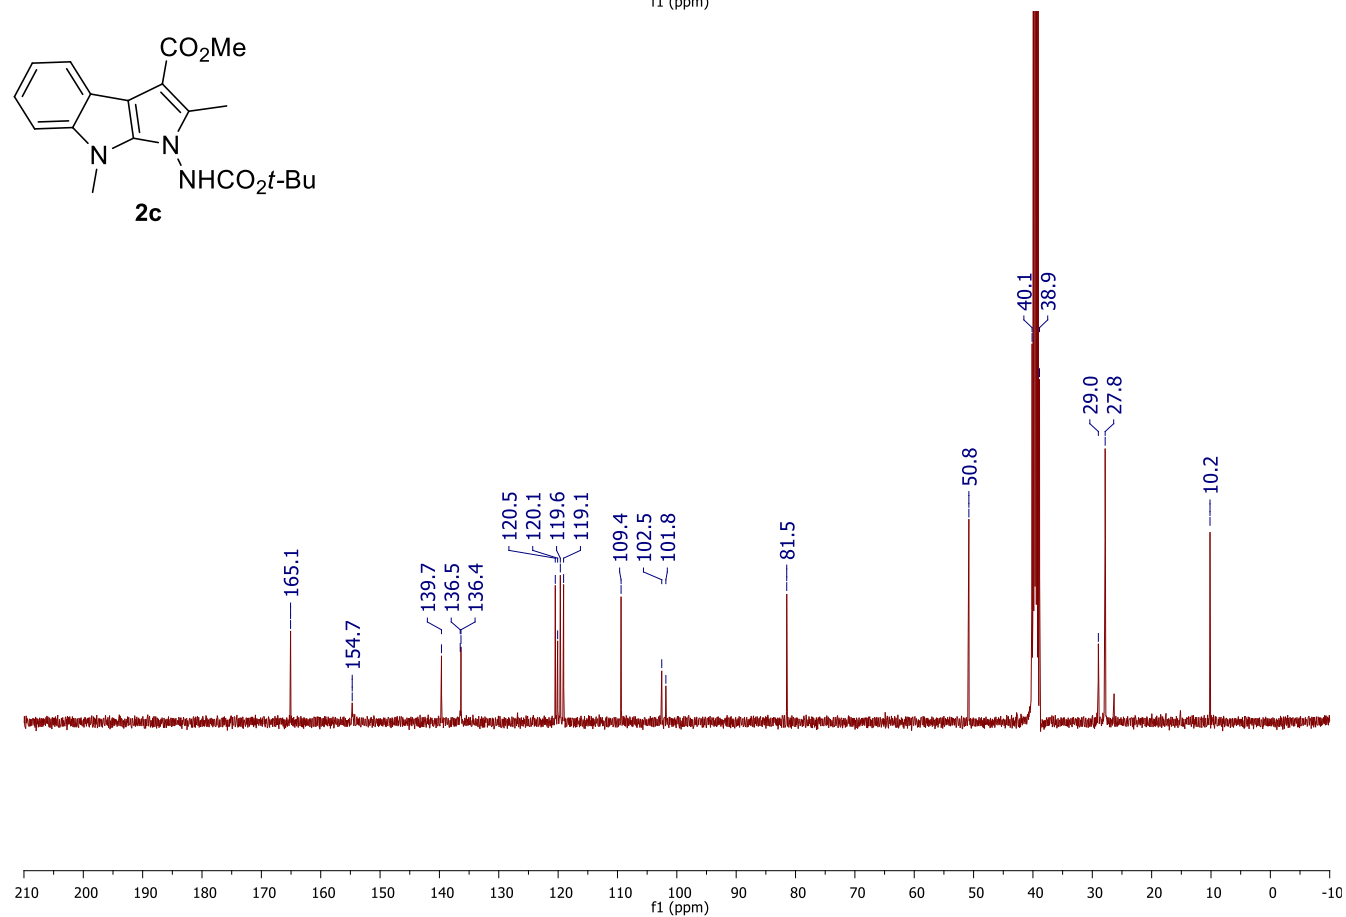

# ELECTRONIC SUPPORTING INFORMATION

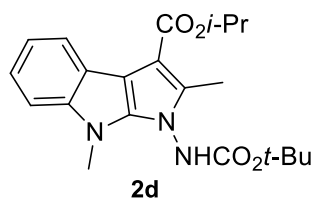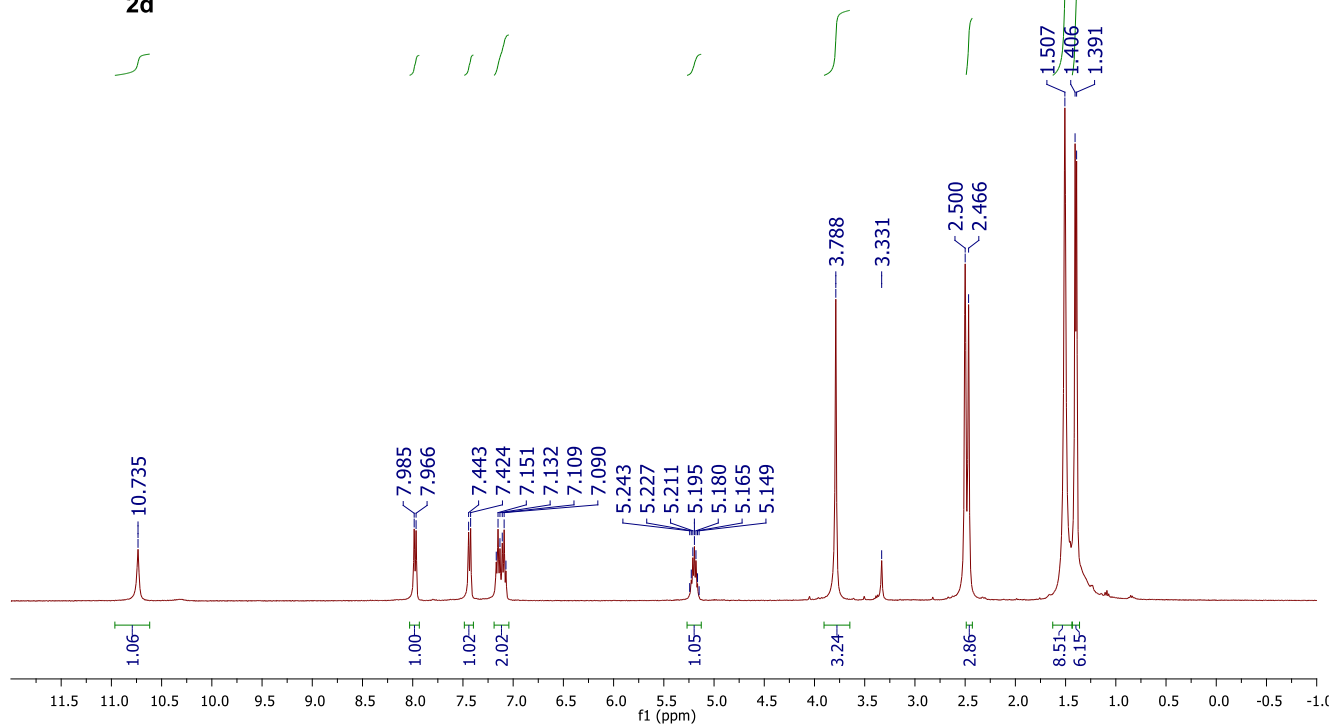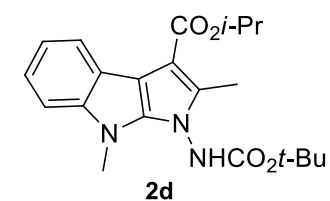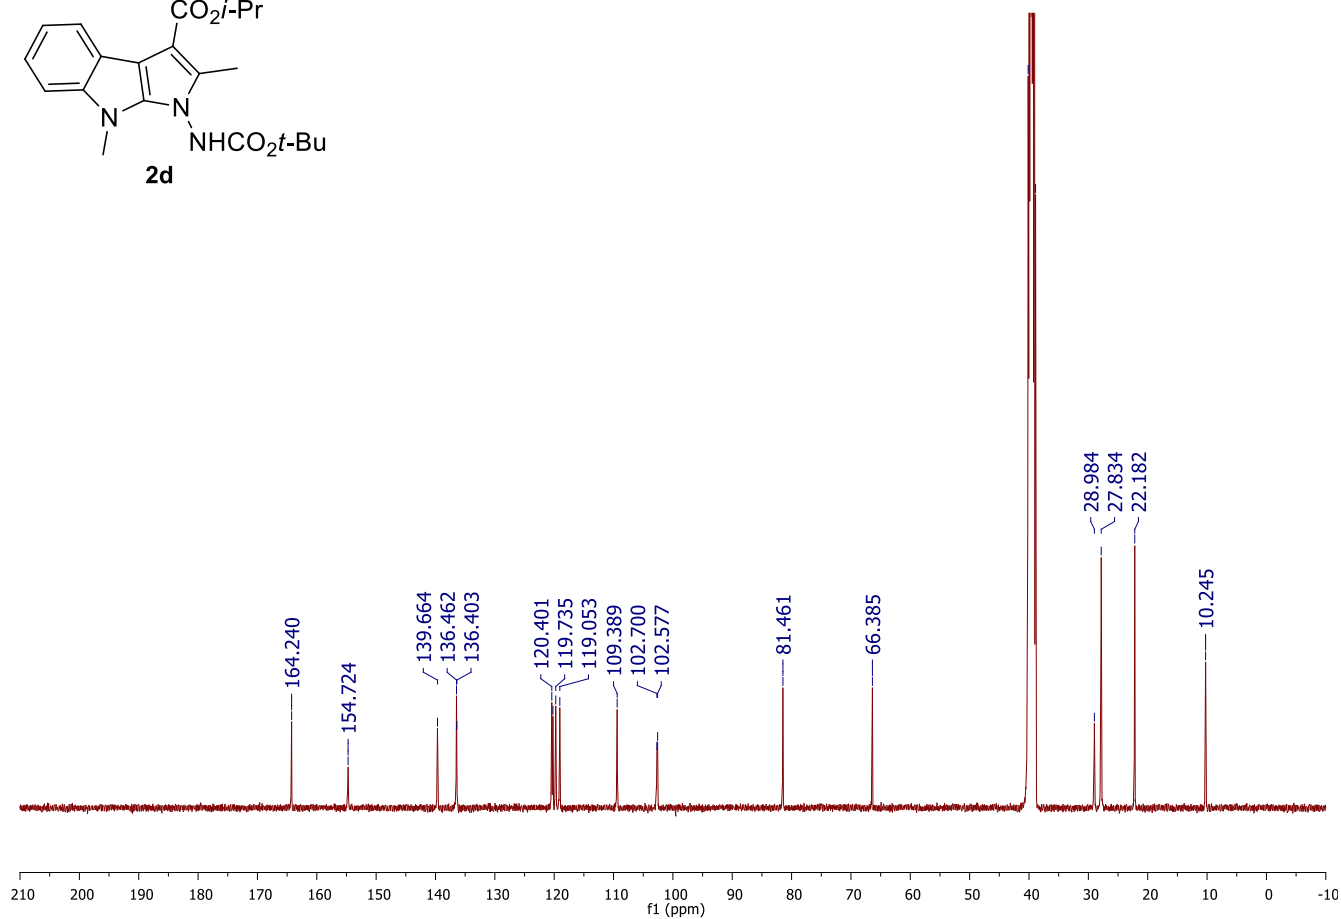

# ELECTRONIC SUPPORTING INFORMATION

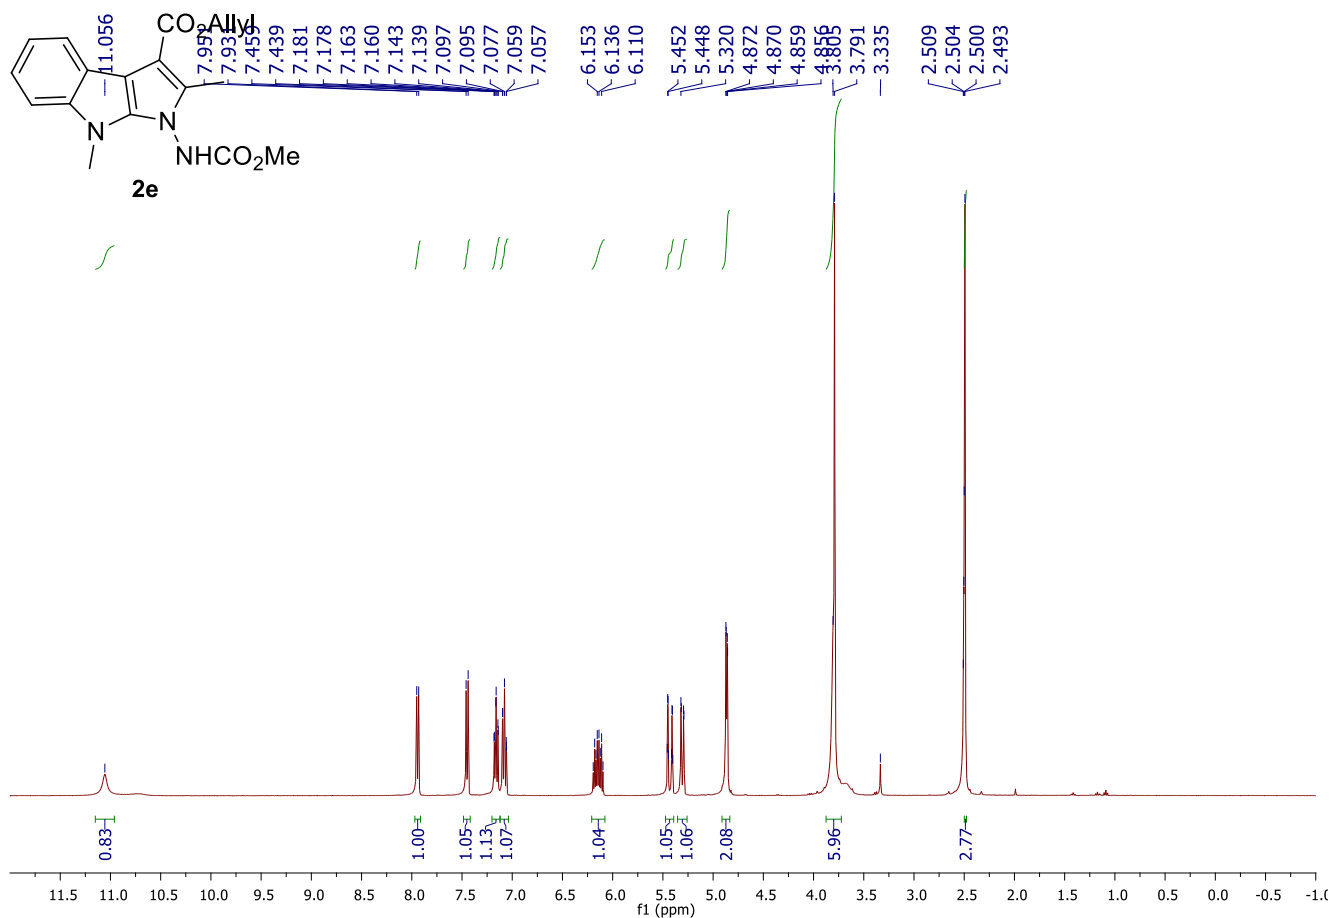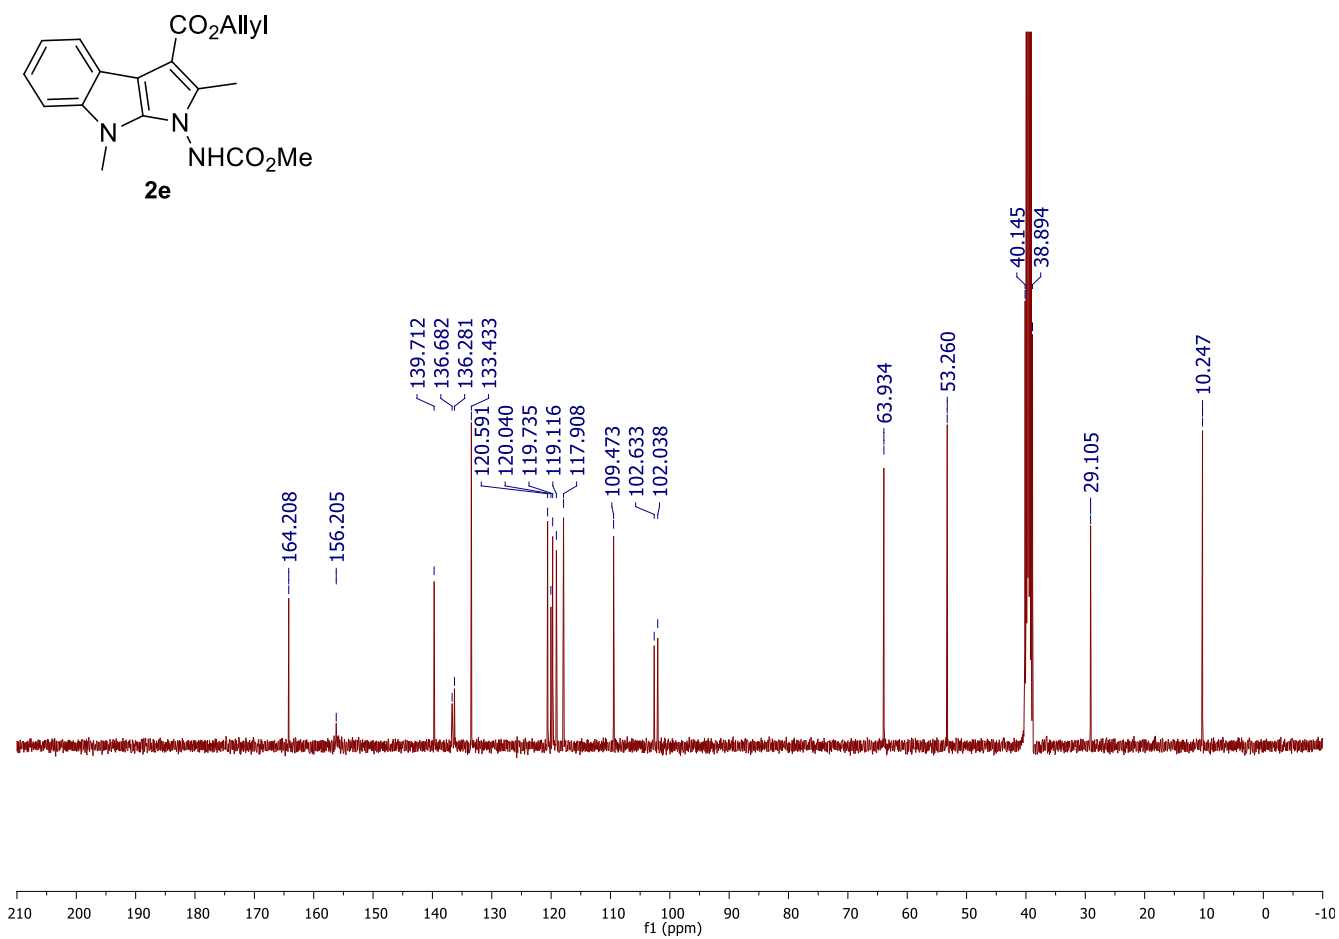

# ELECTRONIC SUPPORTING INFORMATION

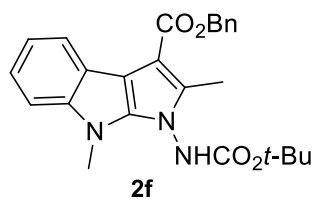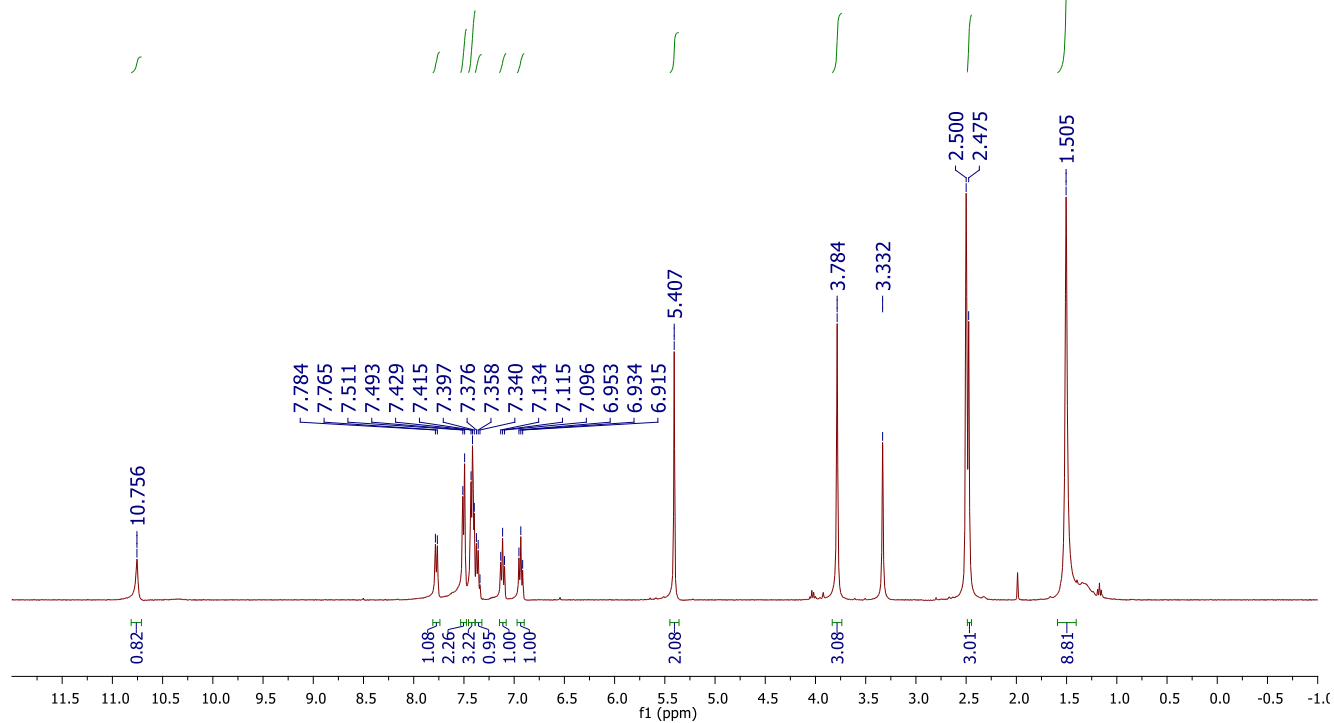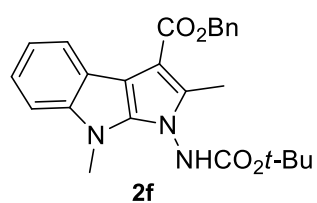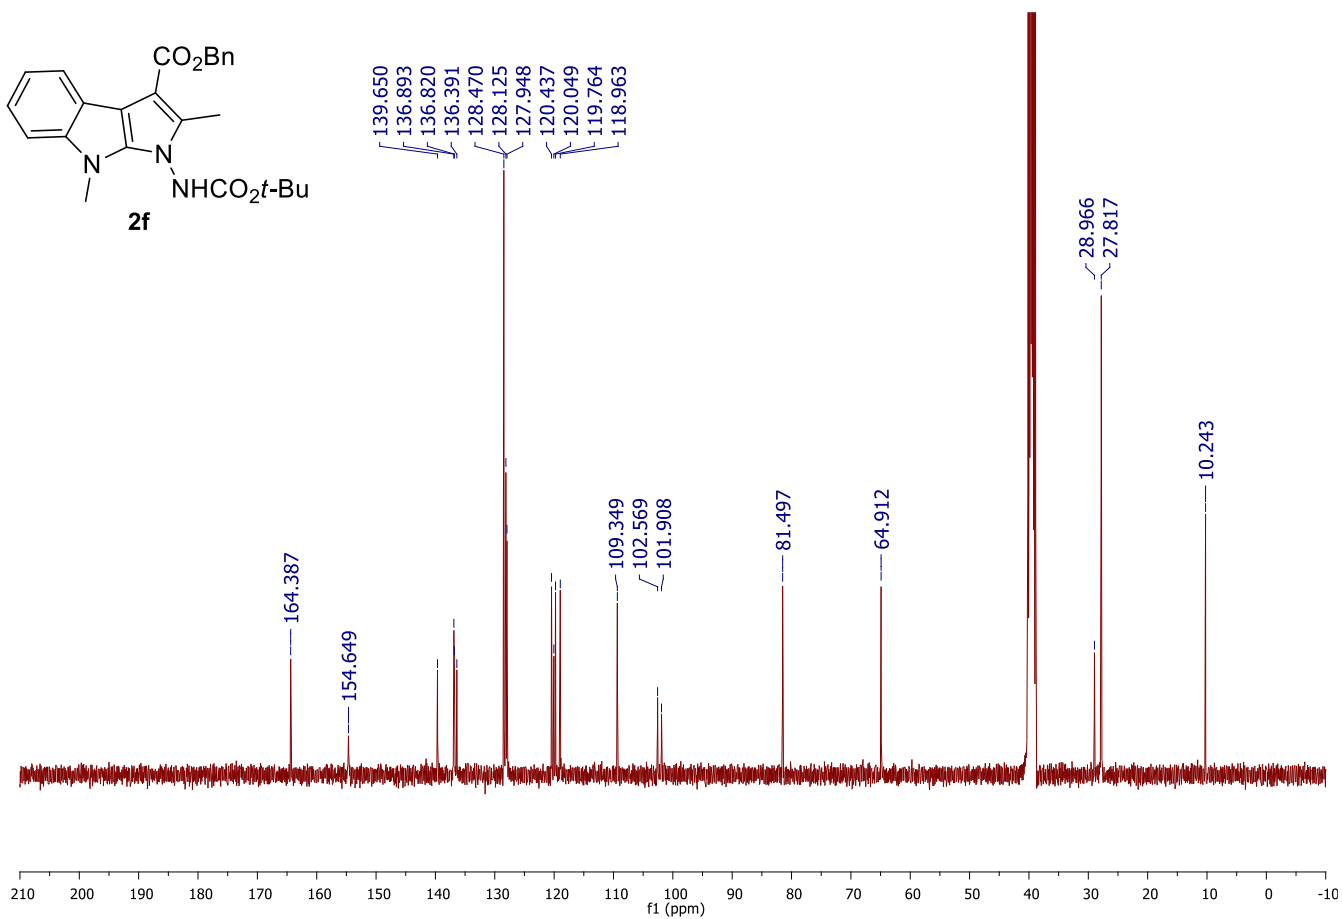

# ELECTRONIC SUPPORTING INFORMATION

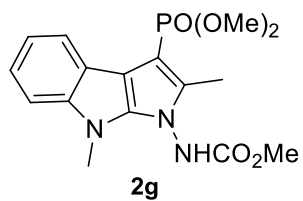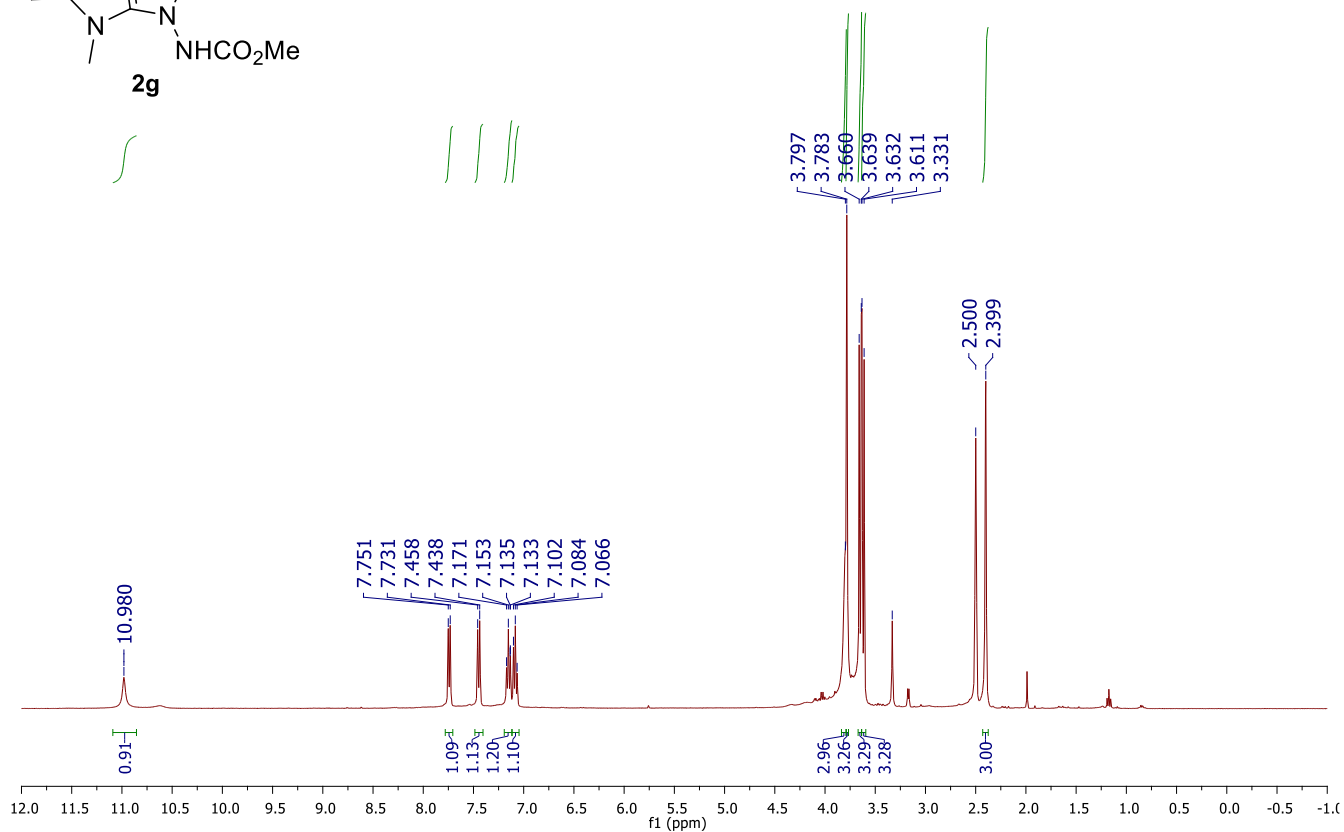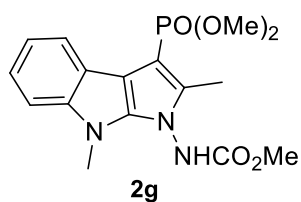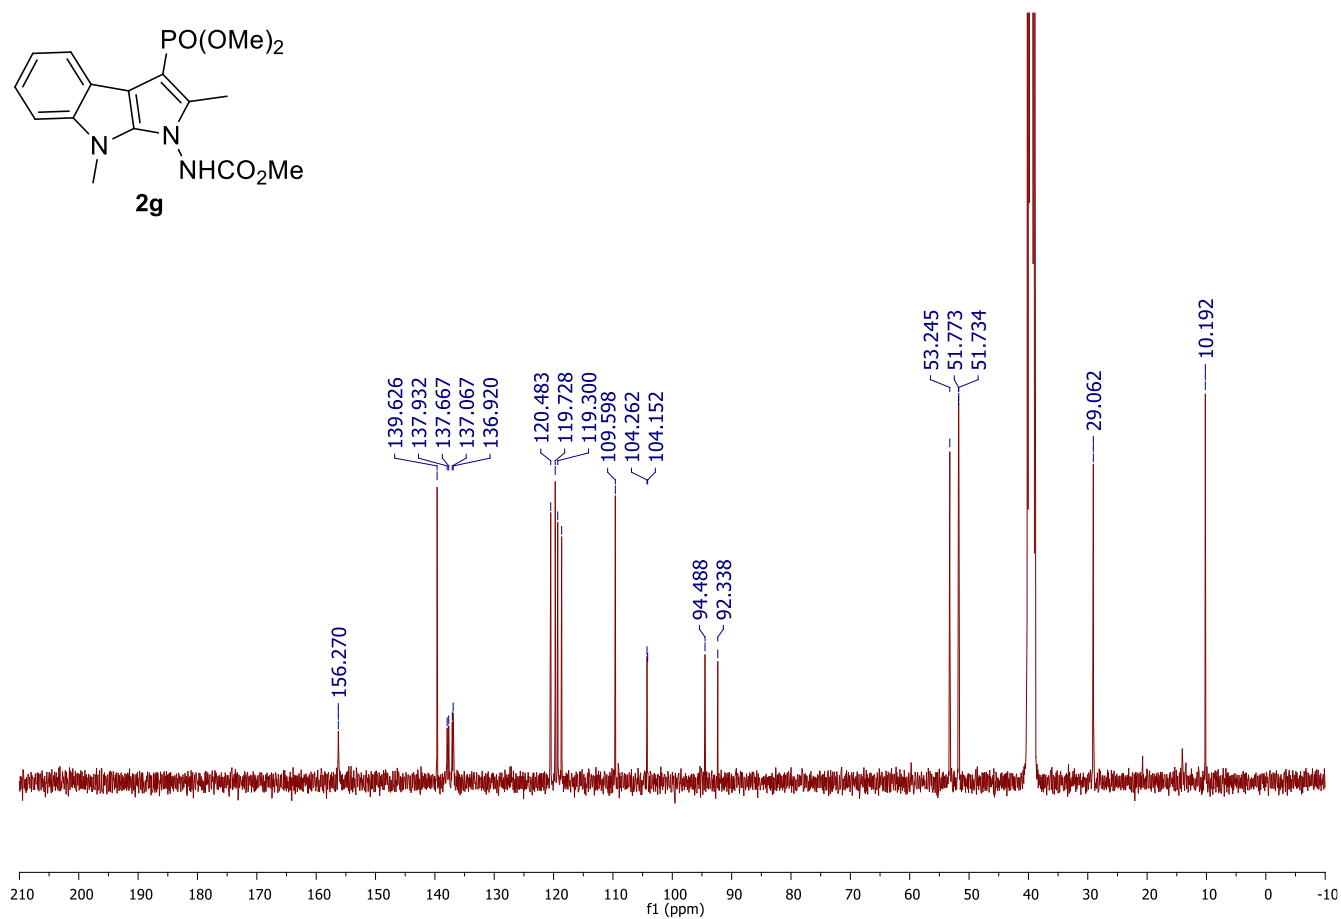

# ELECTRONIC SUPPORTING INFORMATION

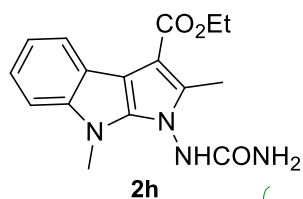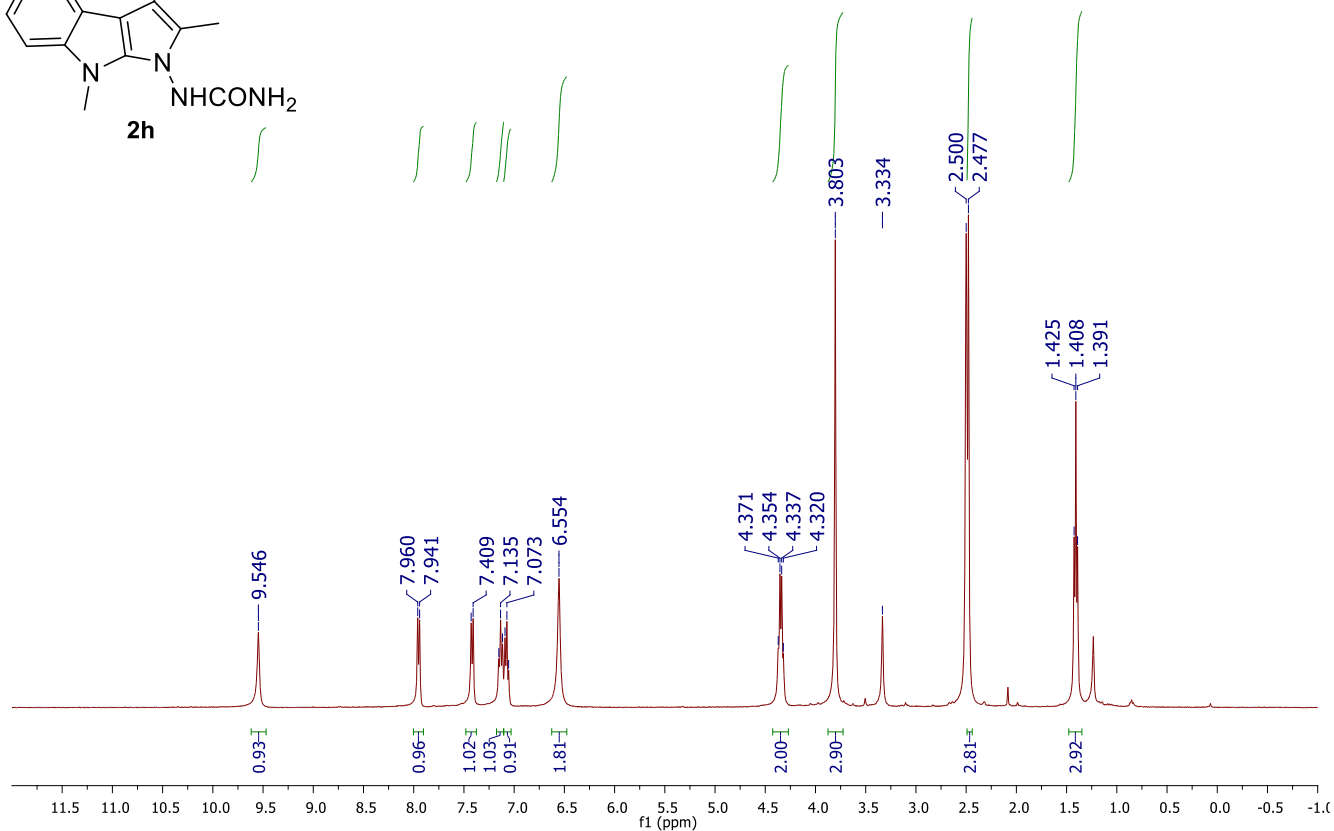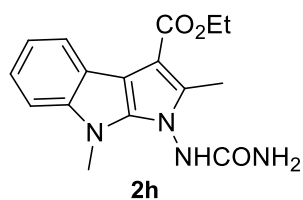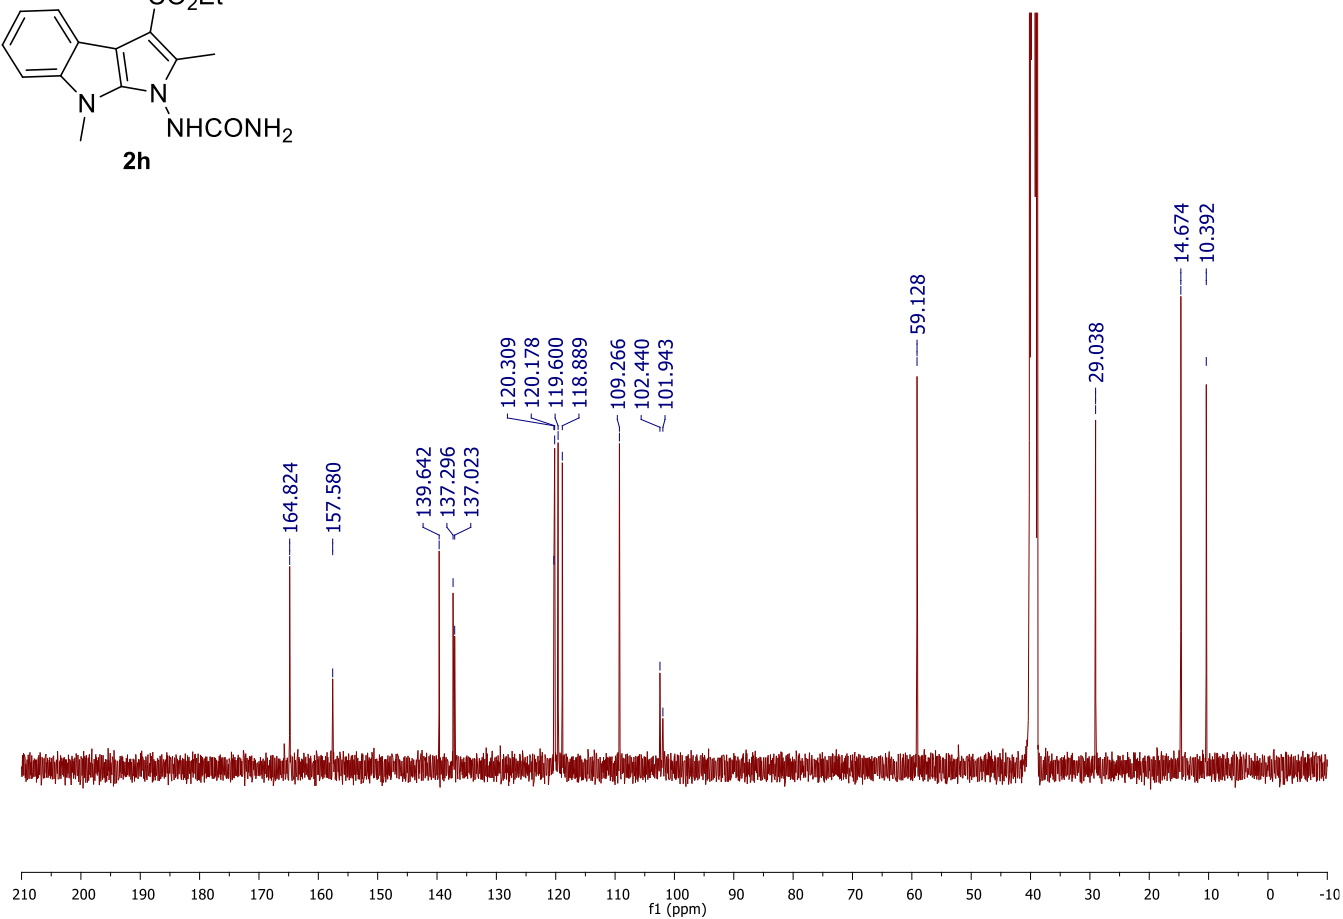



# ELECTRONIC SUPPORTING INFORMATION

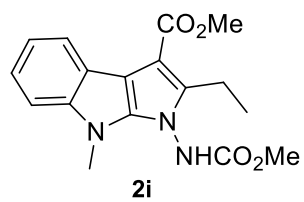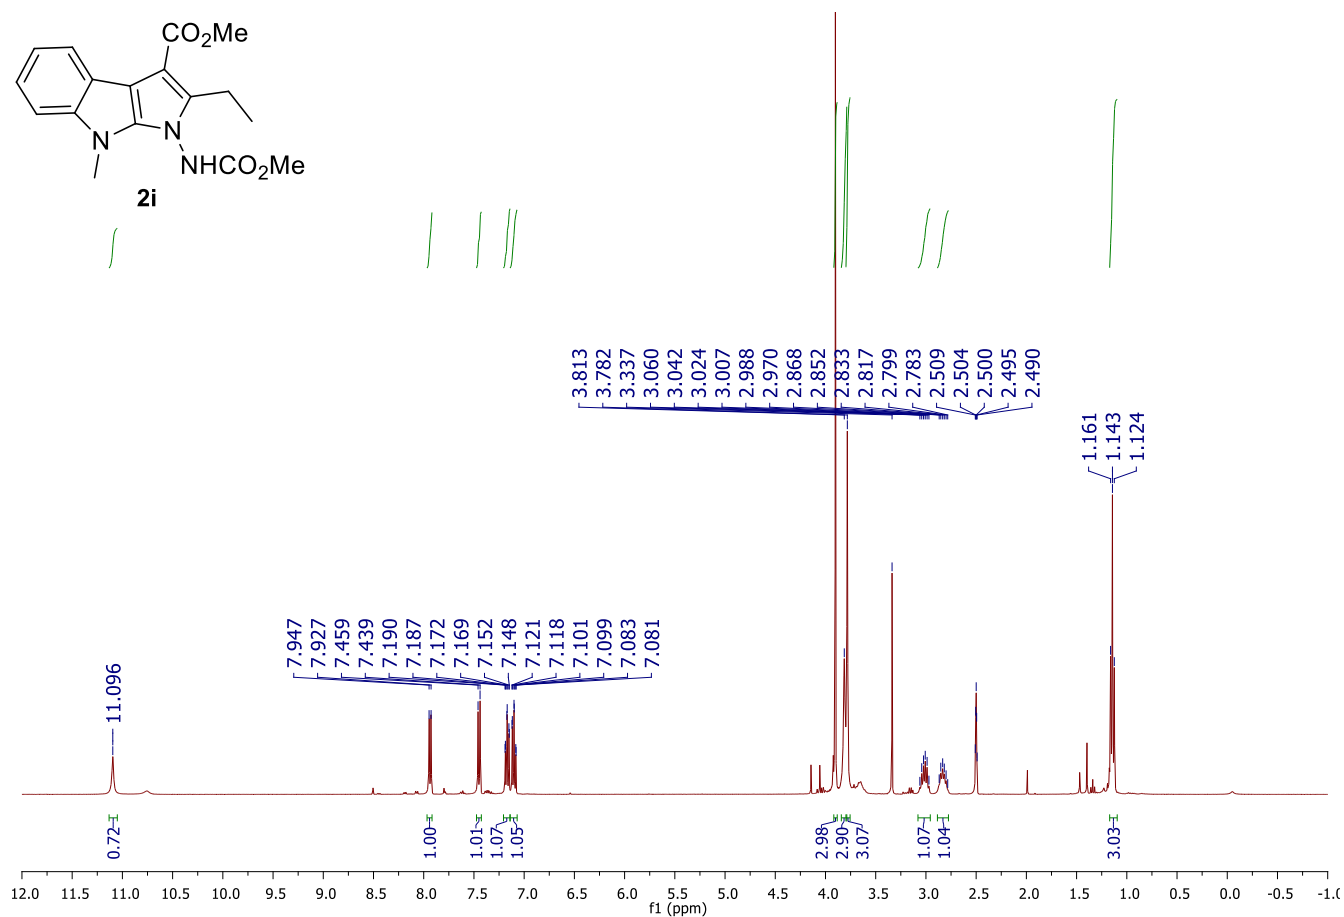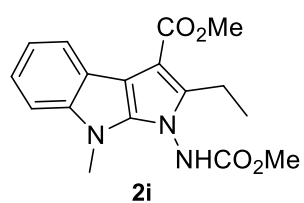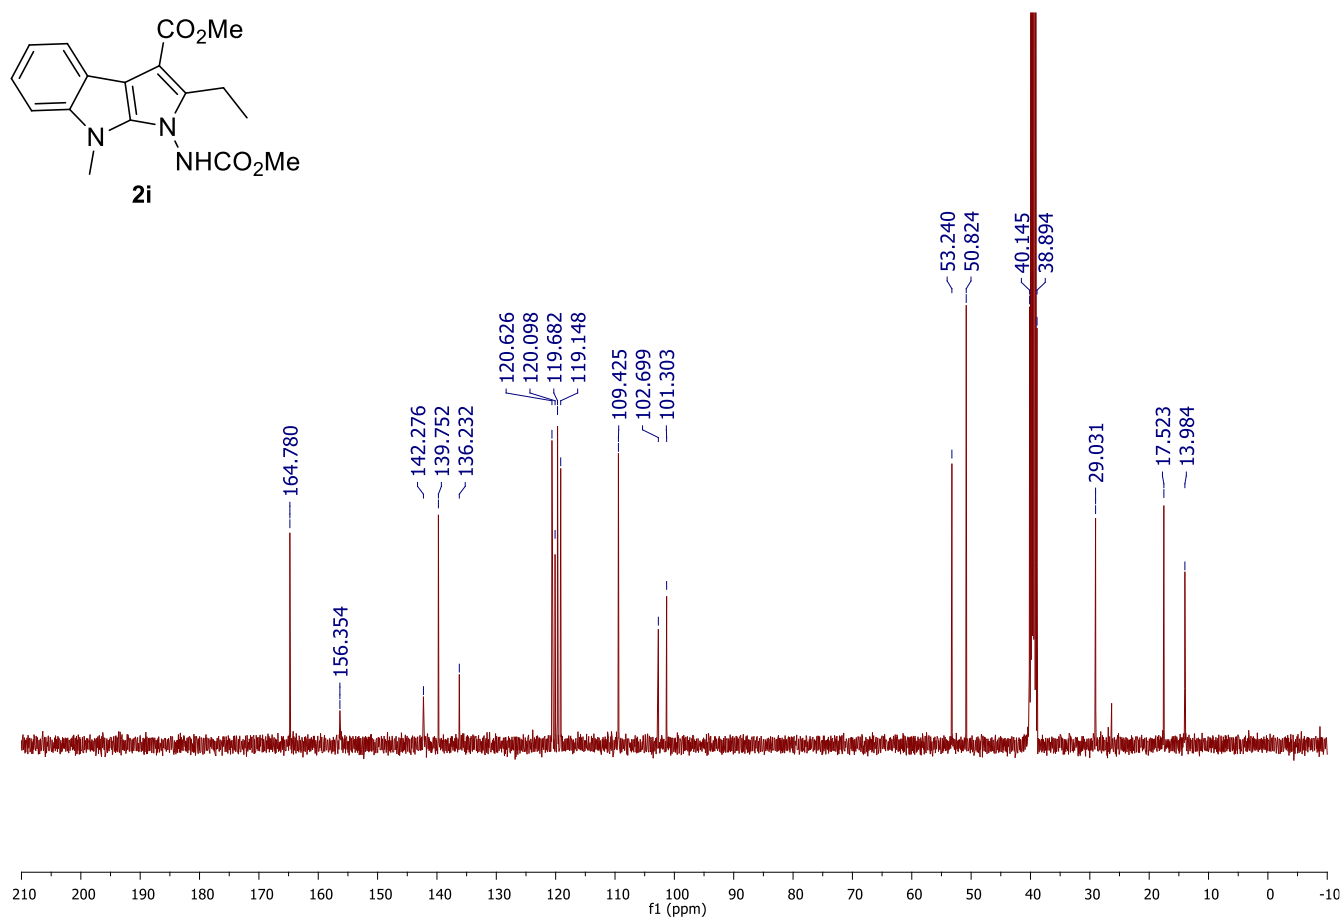

# ELECTRONIC SUPPORTING INFORMATION

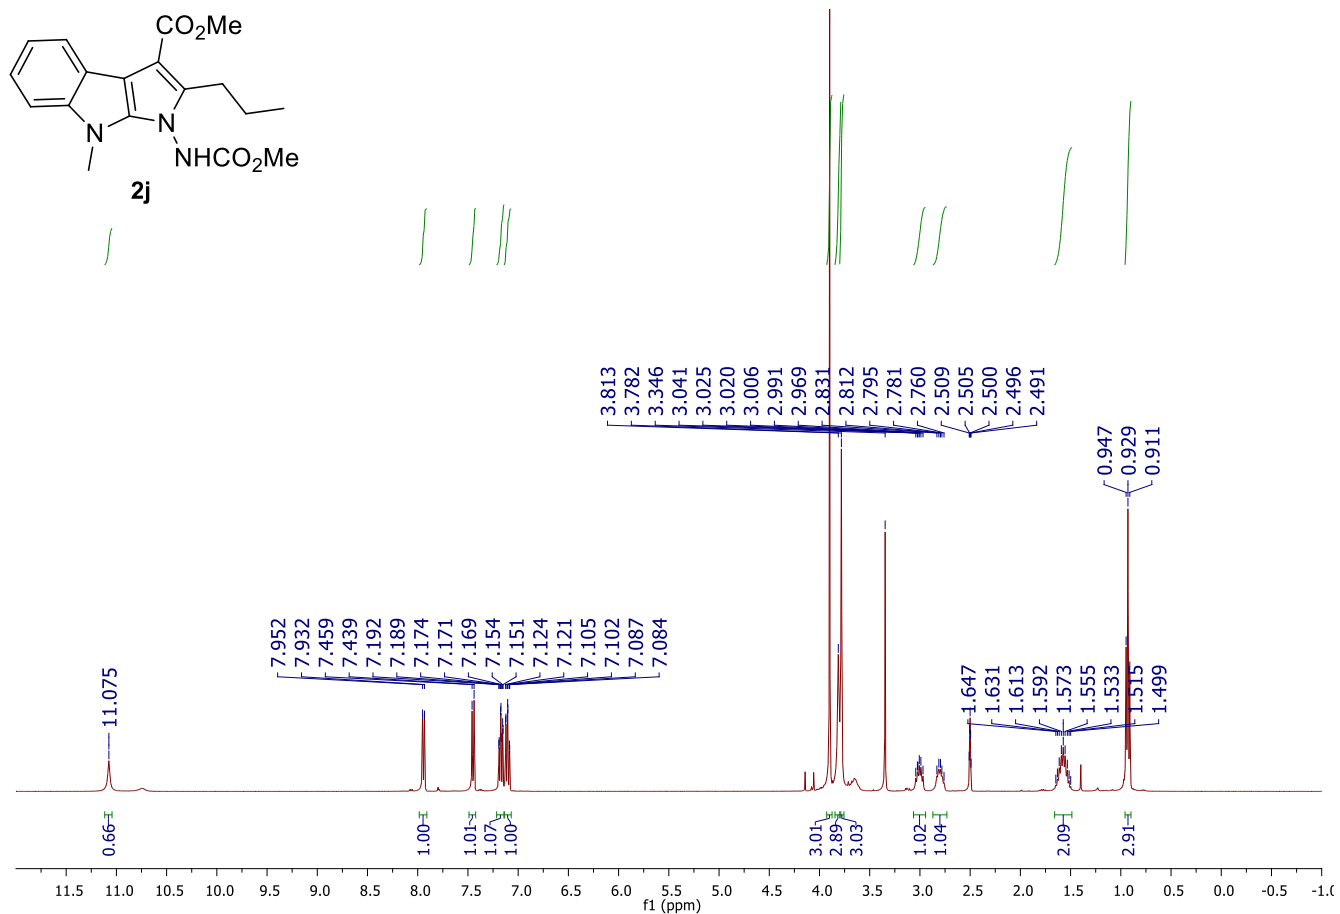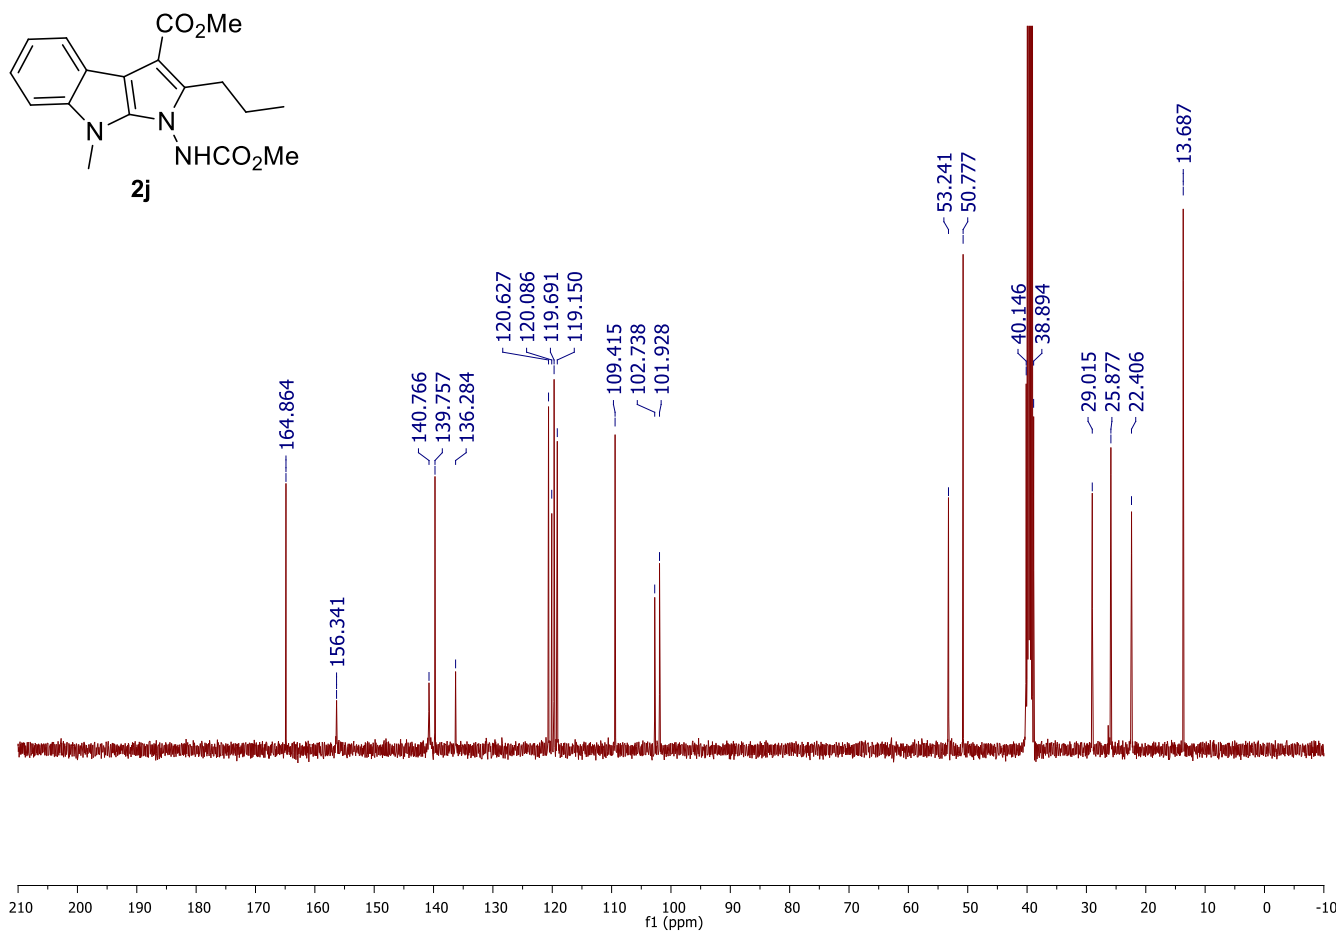

# ELECTRONIC SUPPORTING INFORMATION

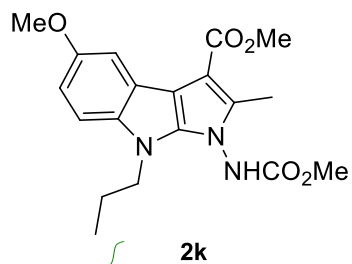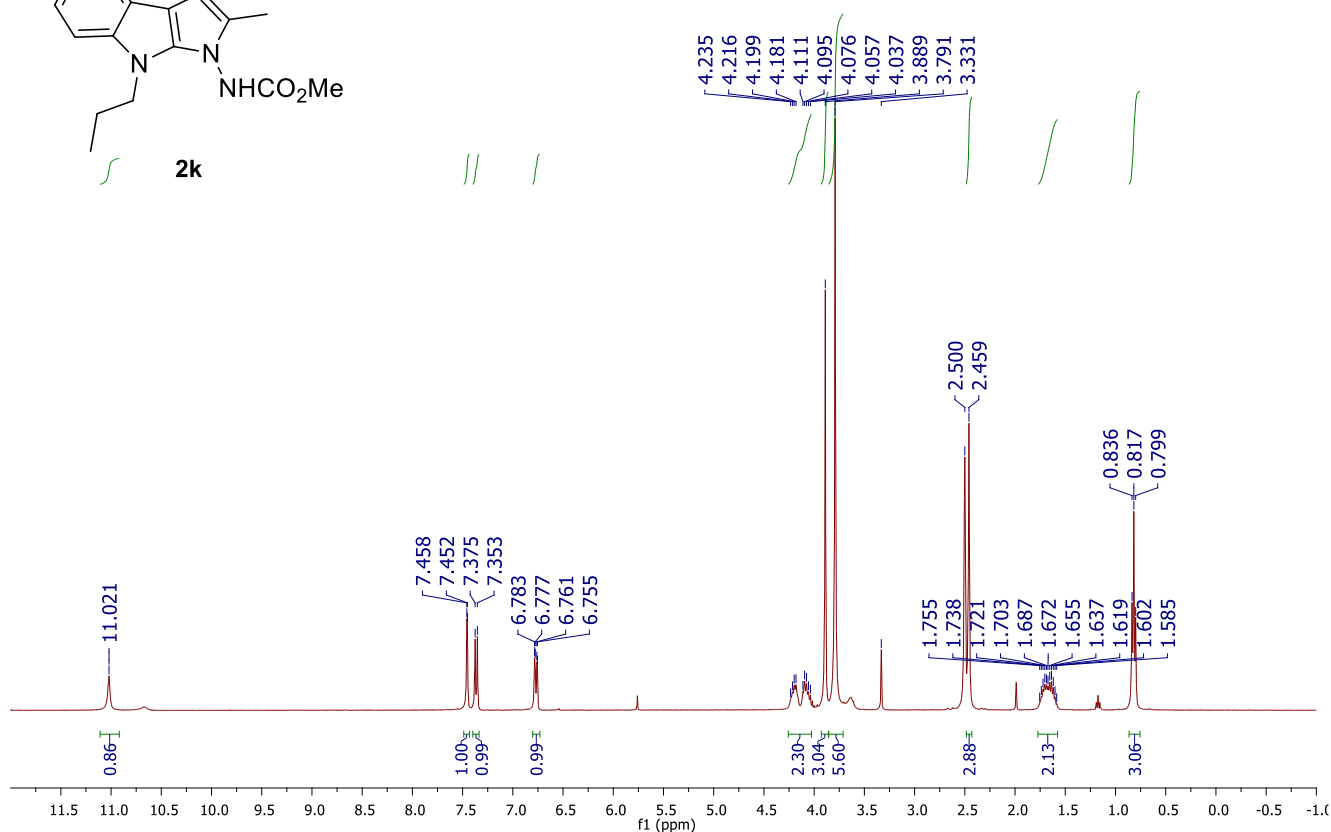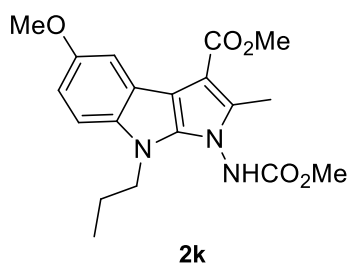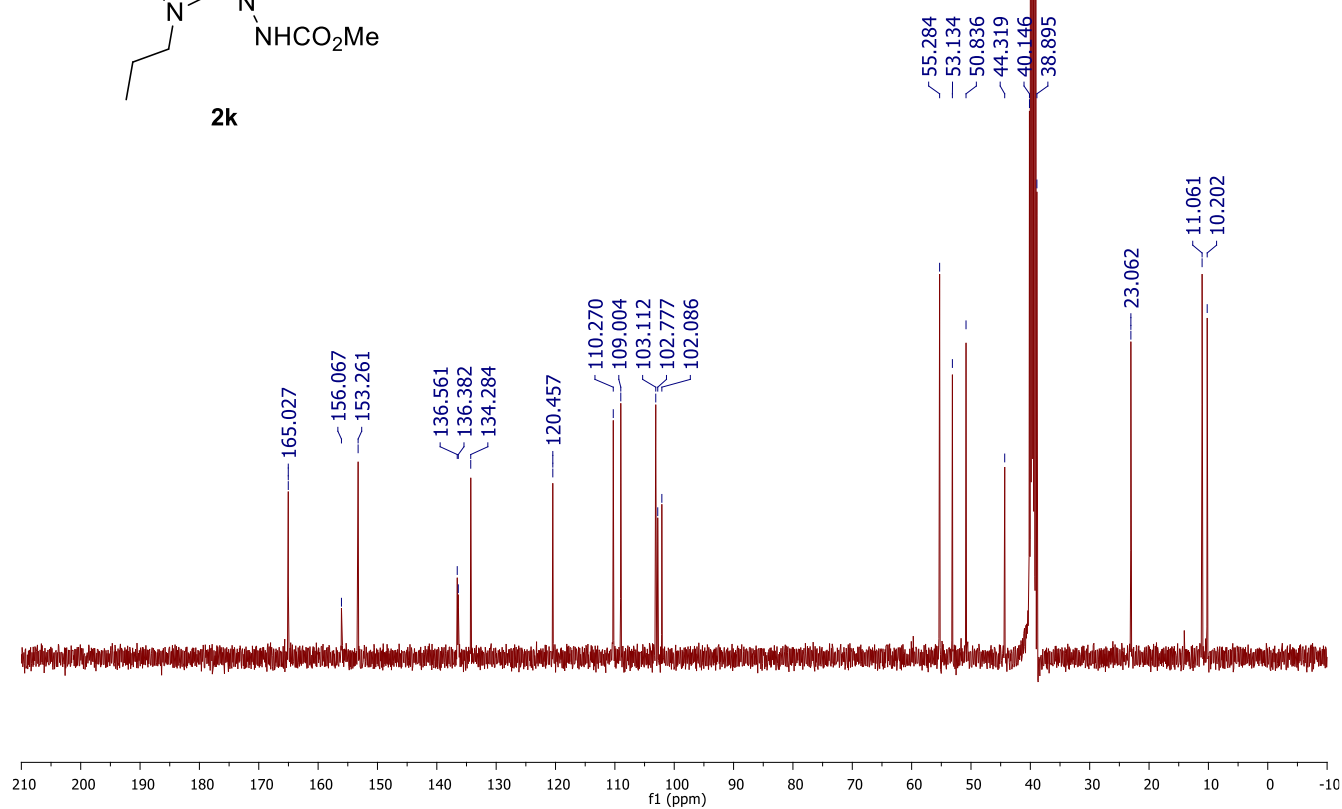



# ELECTRONIC SUPPORTING INFORMATION

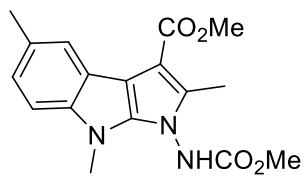

**2m**

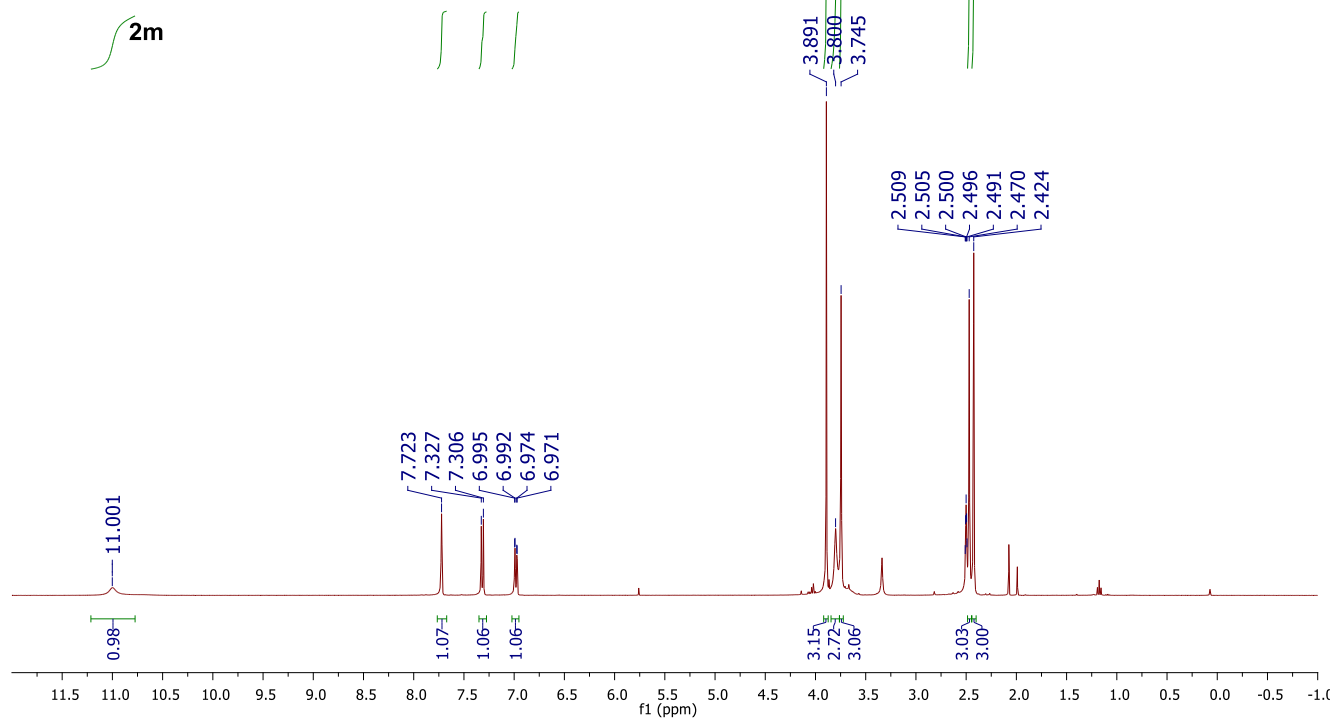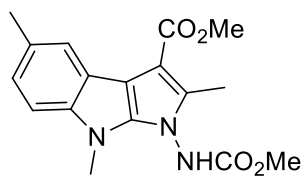

**2m**

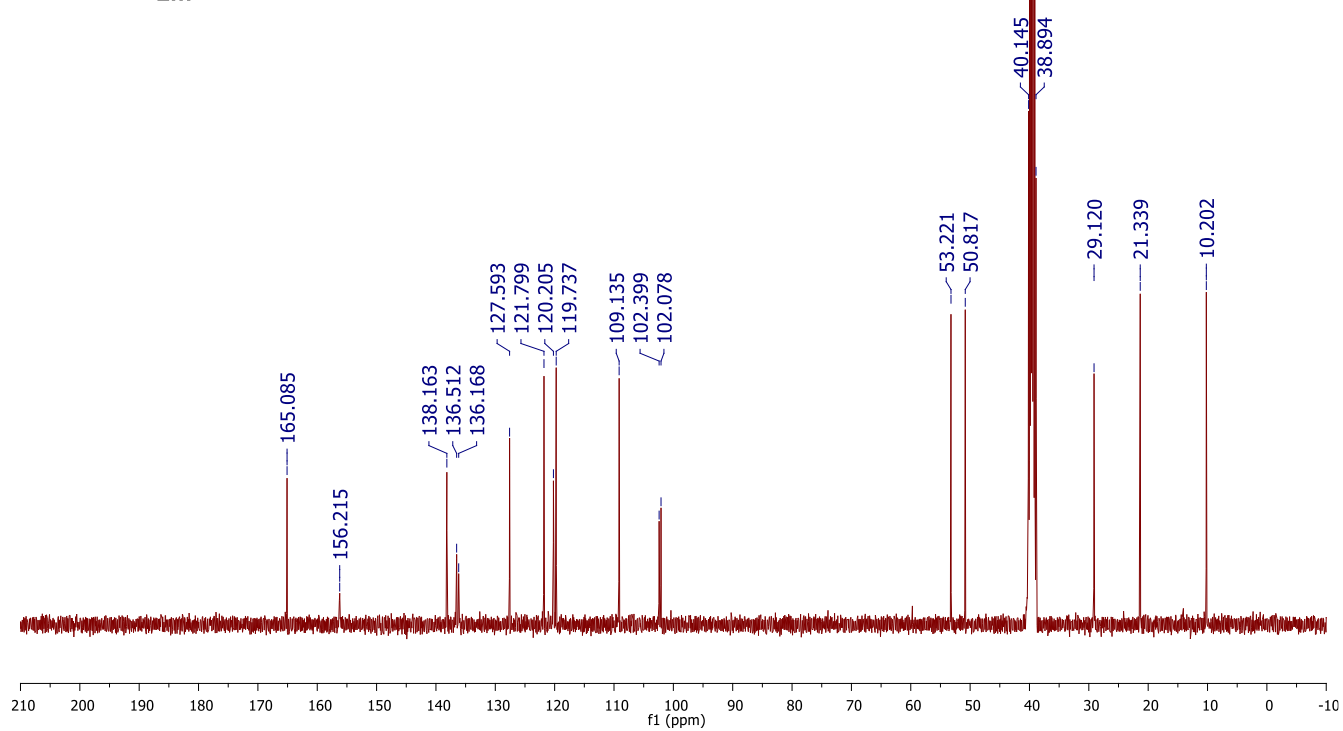

# ELECTRONIC SUPPORTING INFORMATION

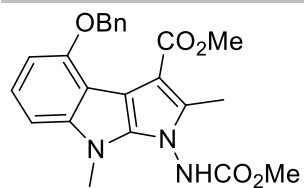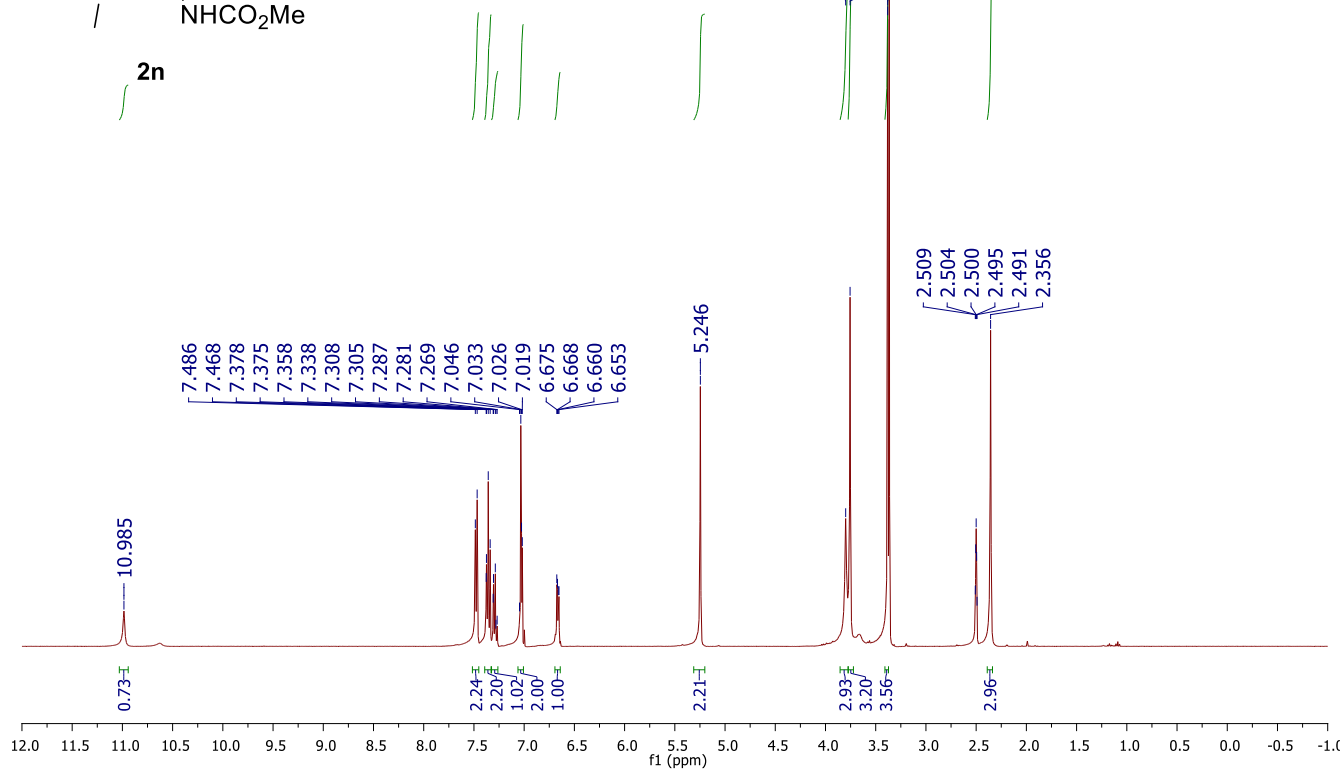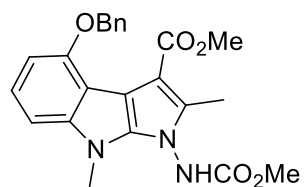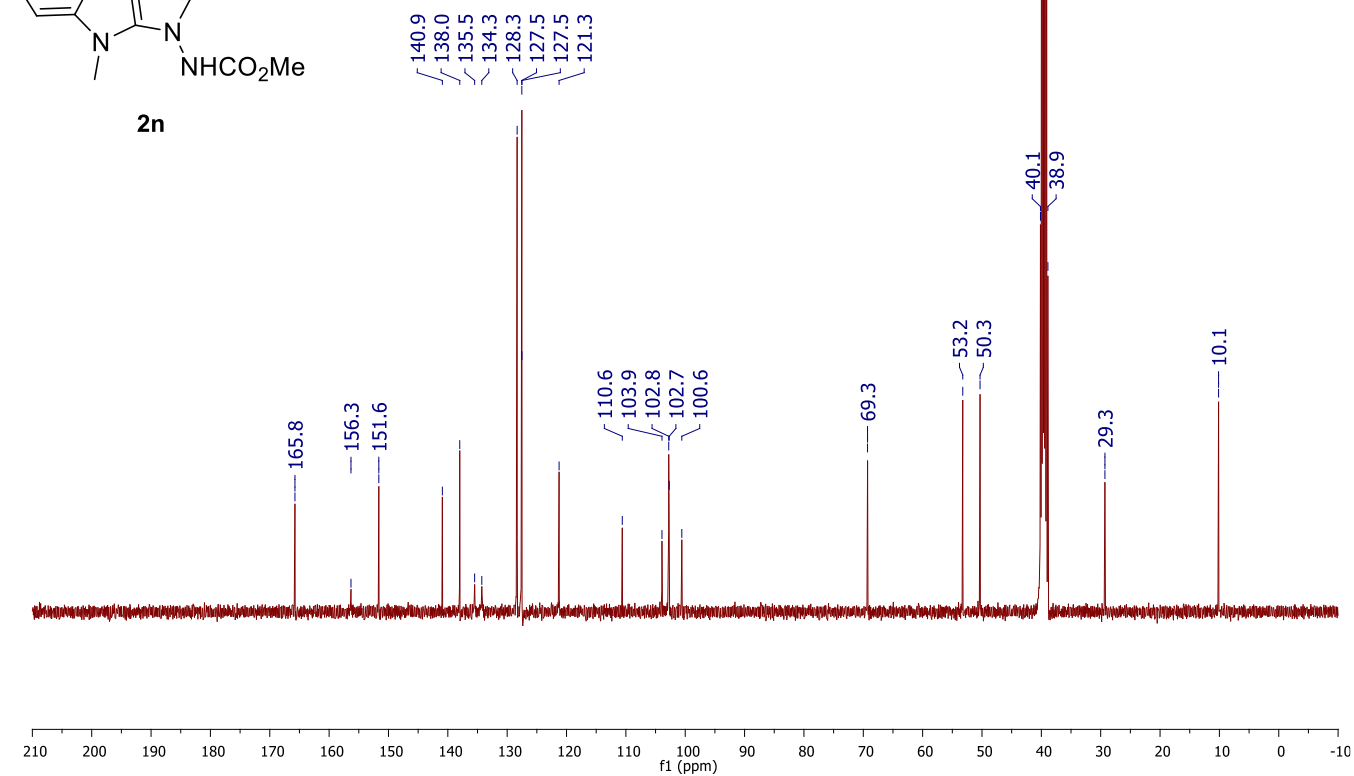

# ELECTRONIC SUPPORTING INFORMATION

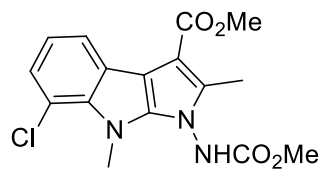

**2o**

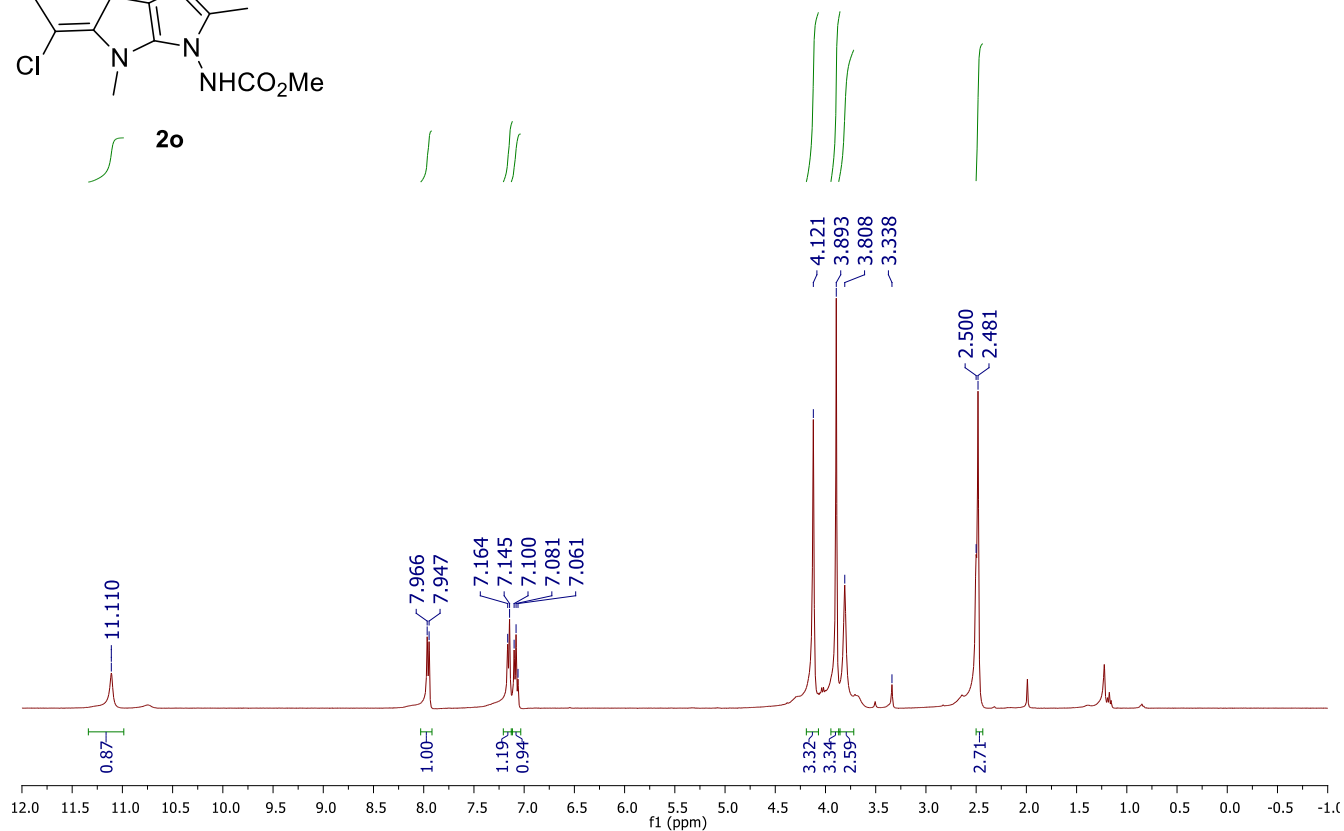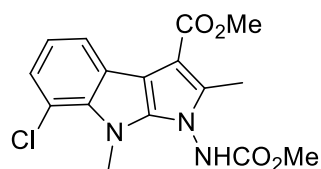

**2o**

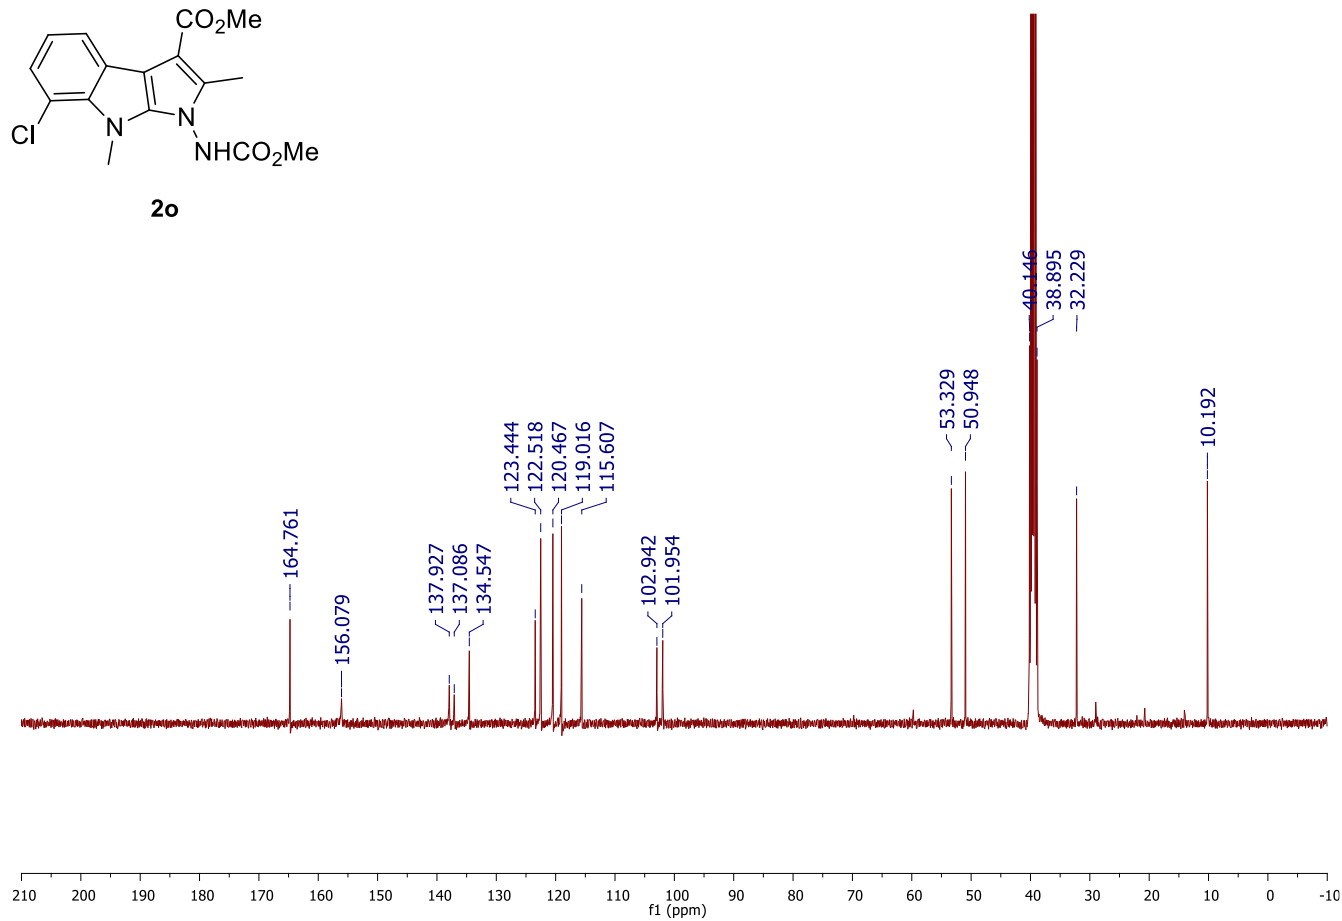

# ELECTRONIC SUPPORTING INFORMATION

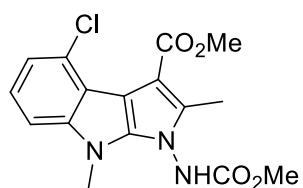

**2p**

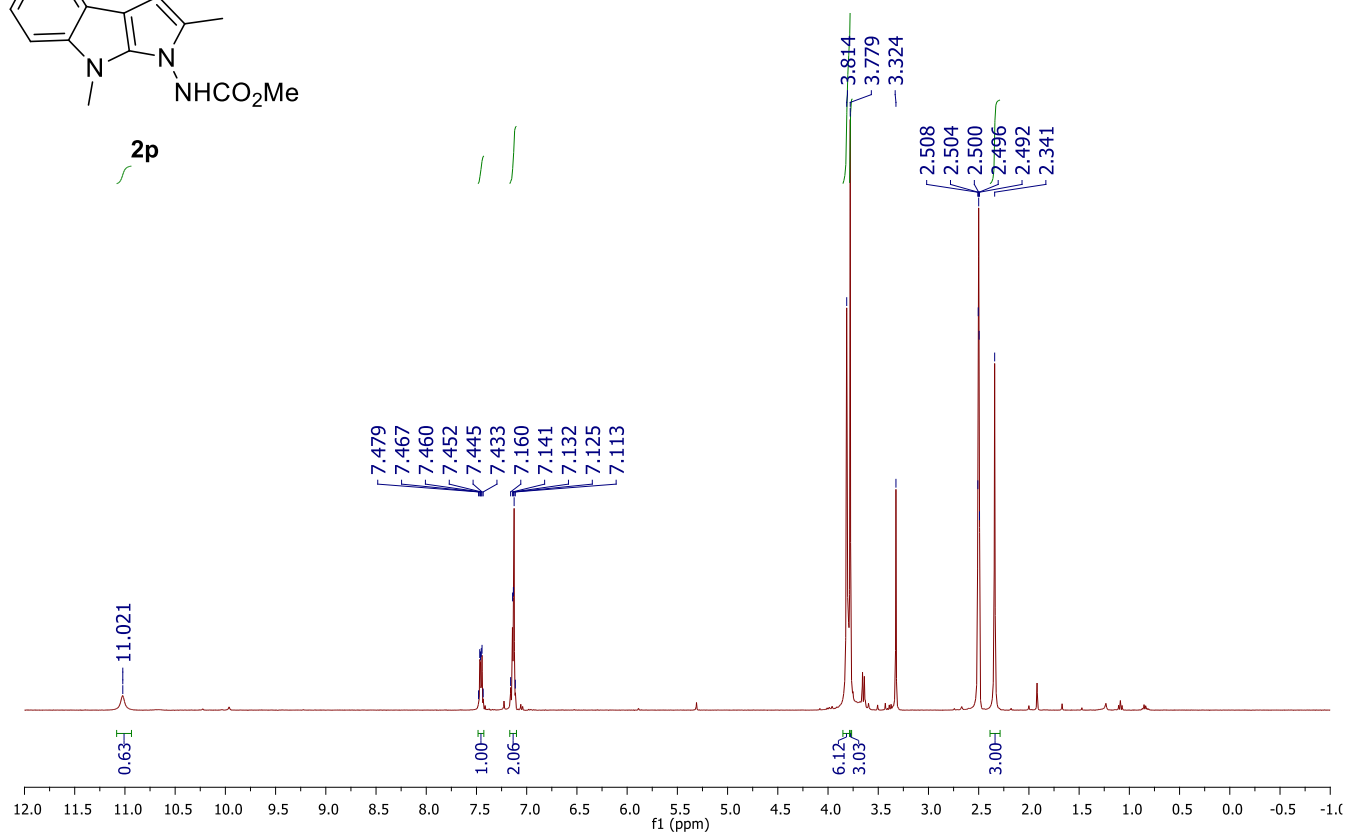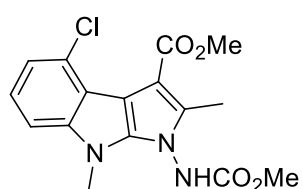

**2p**

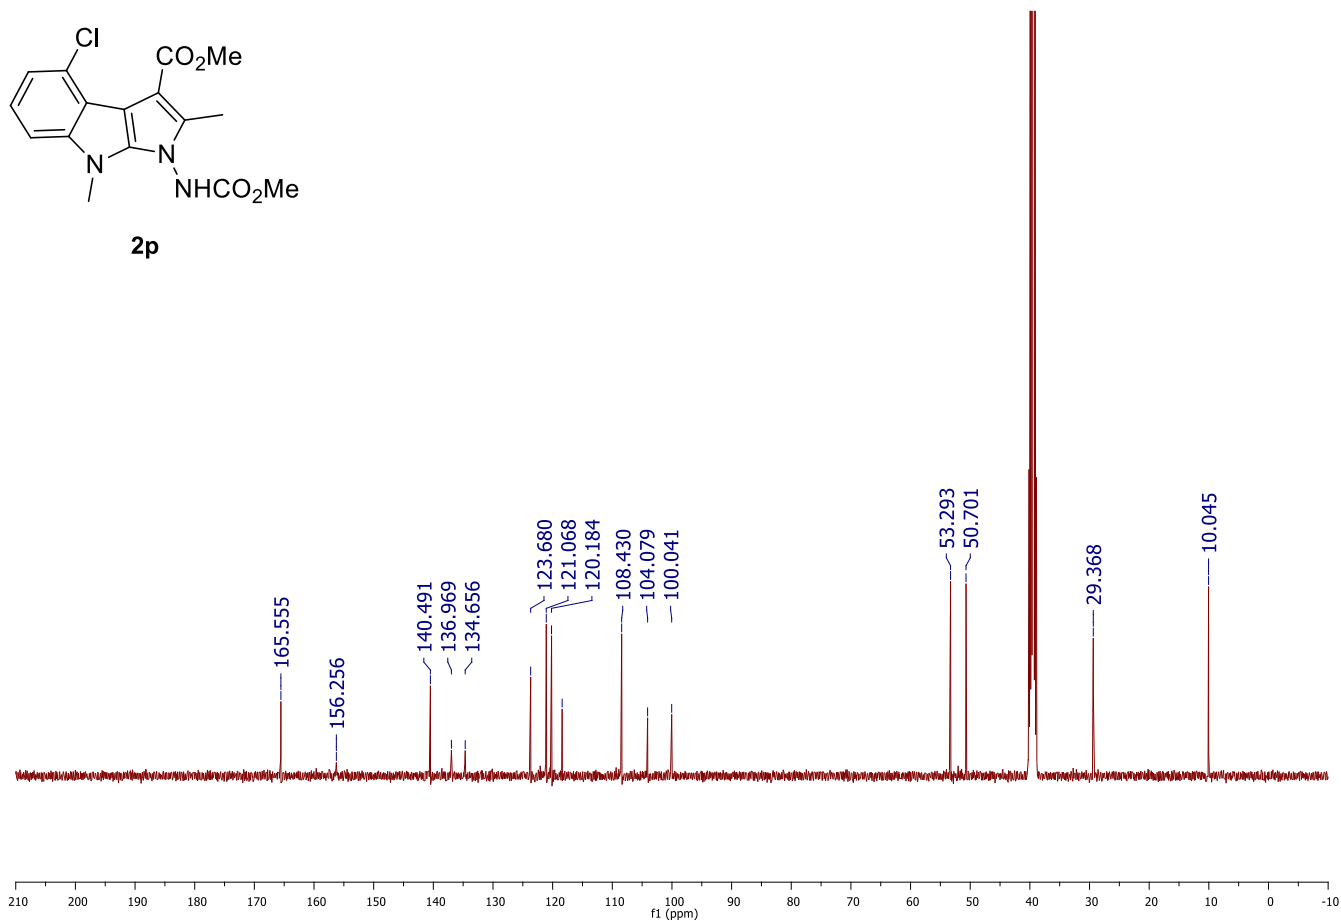



# ELECTRONIC SUPPORTING INFORMATION

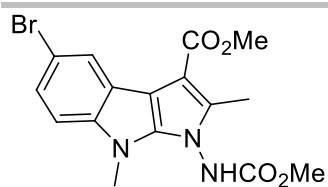

**2q**

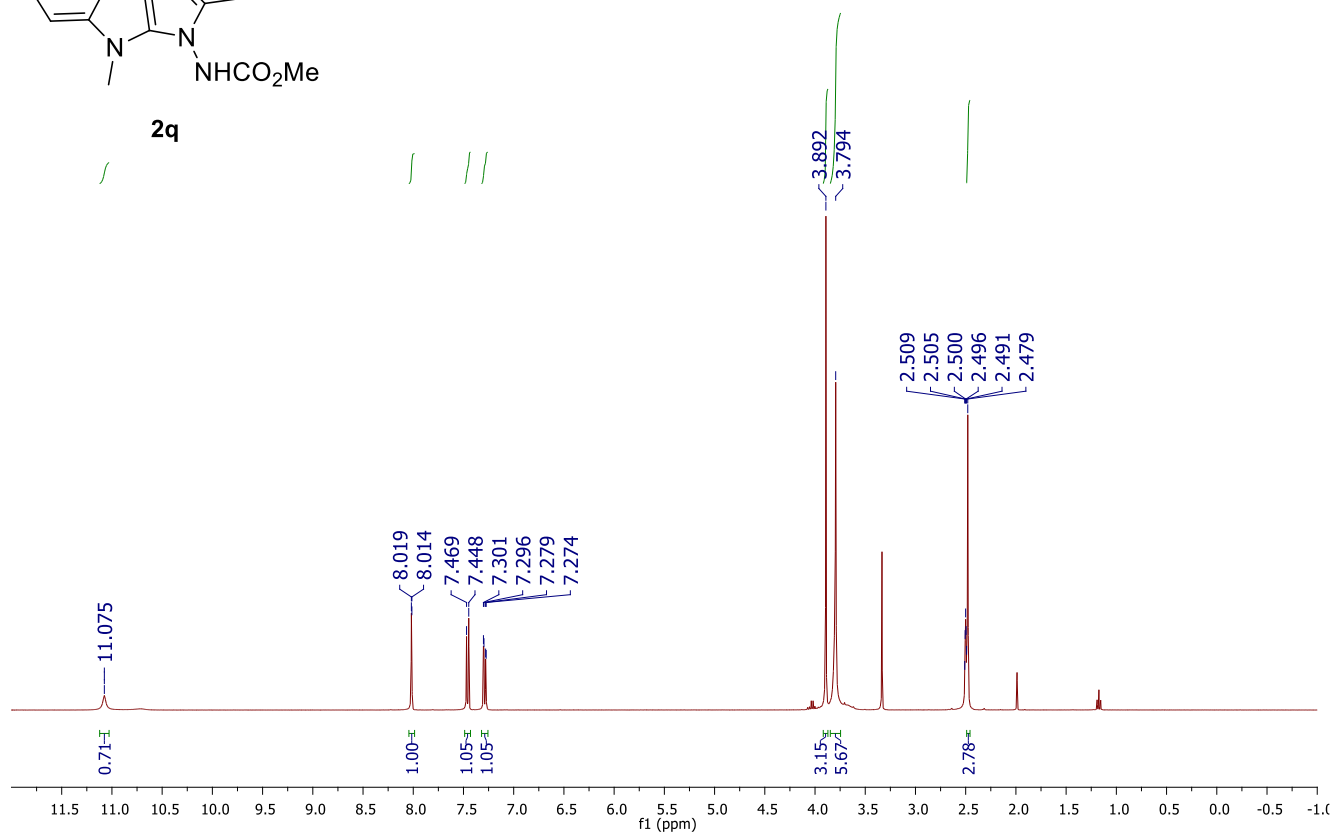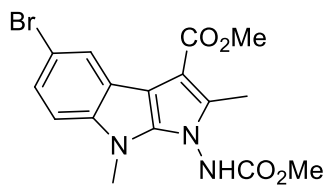

**2q**

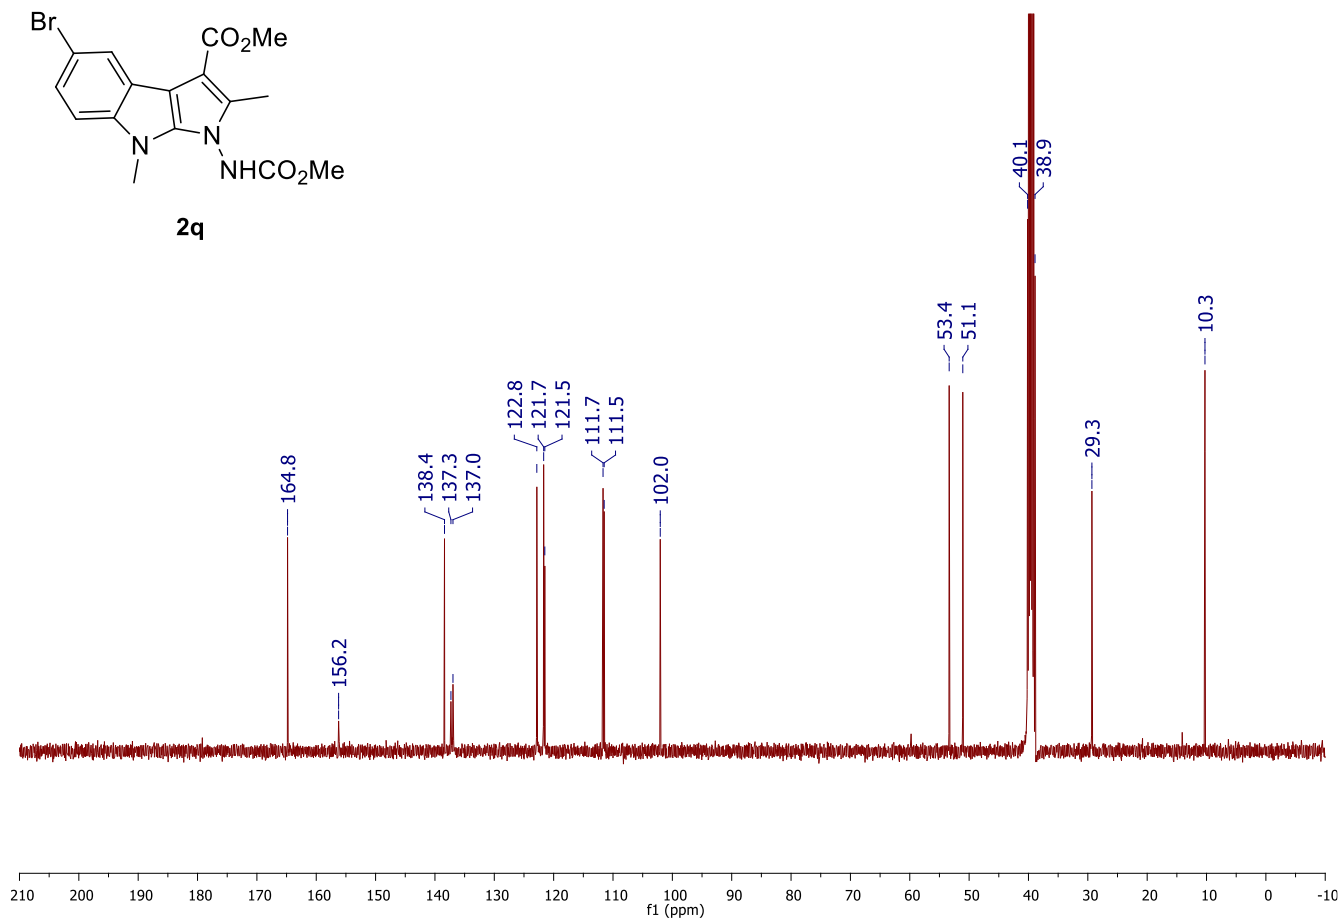

# ELECTRONIC SUPPORTING INFORMATION

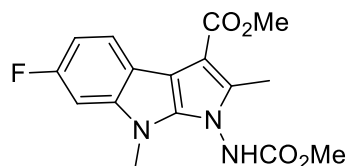

**2r**

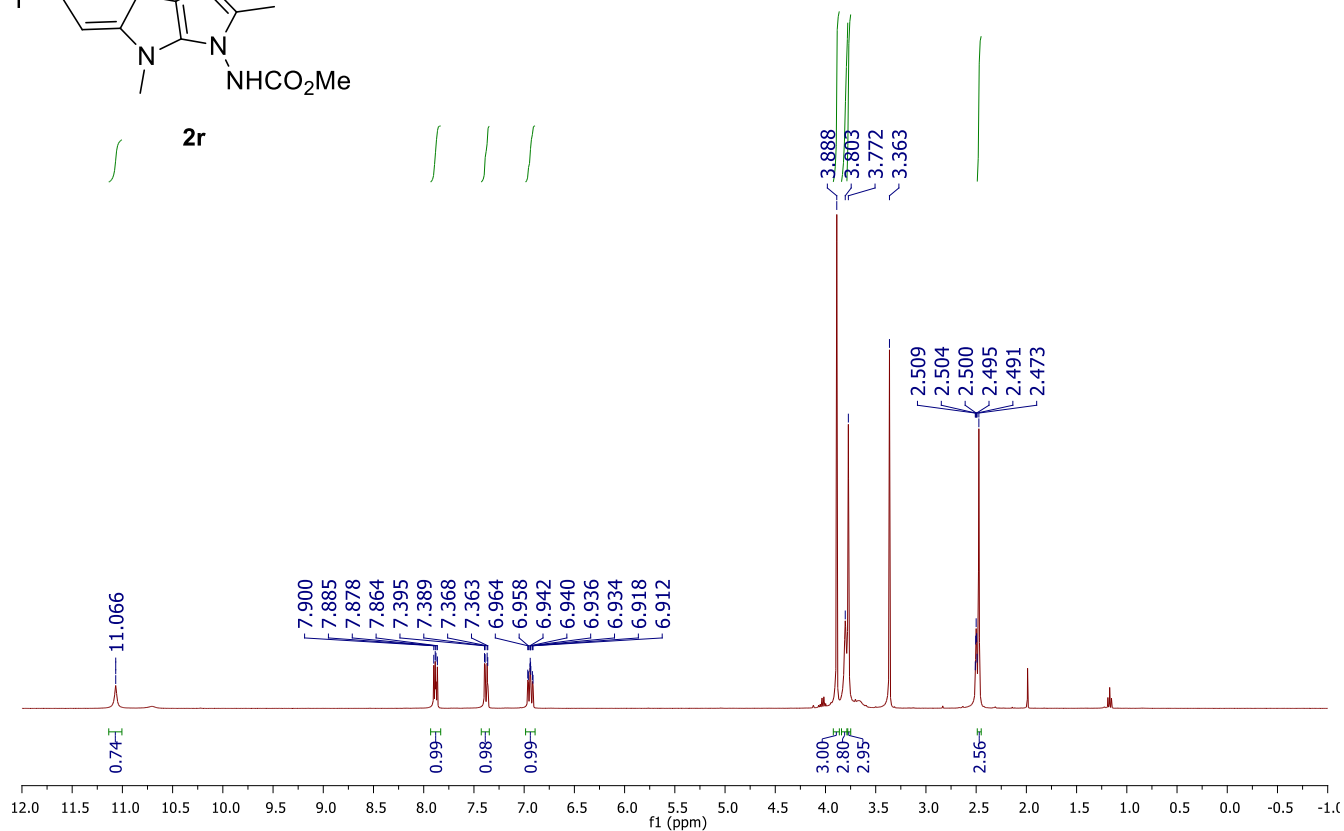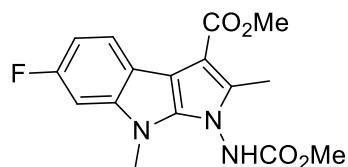

**2r**

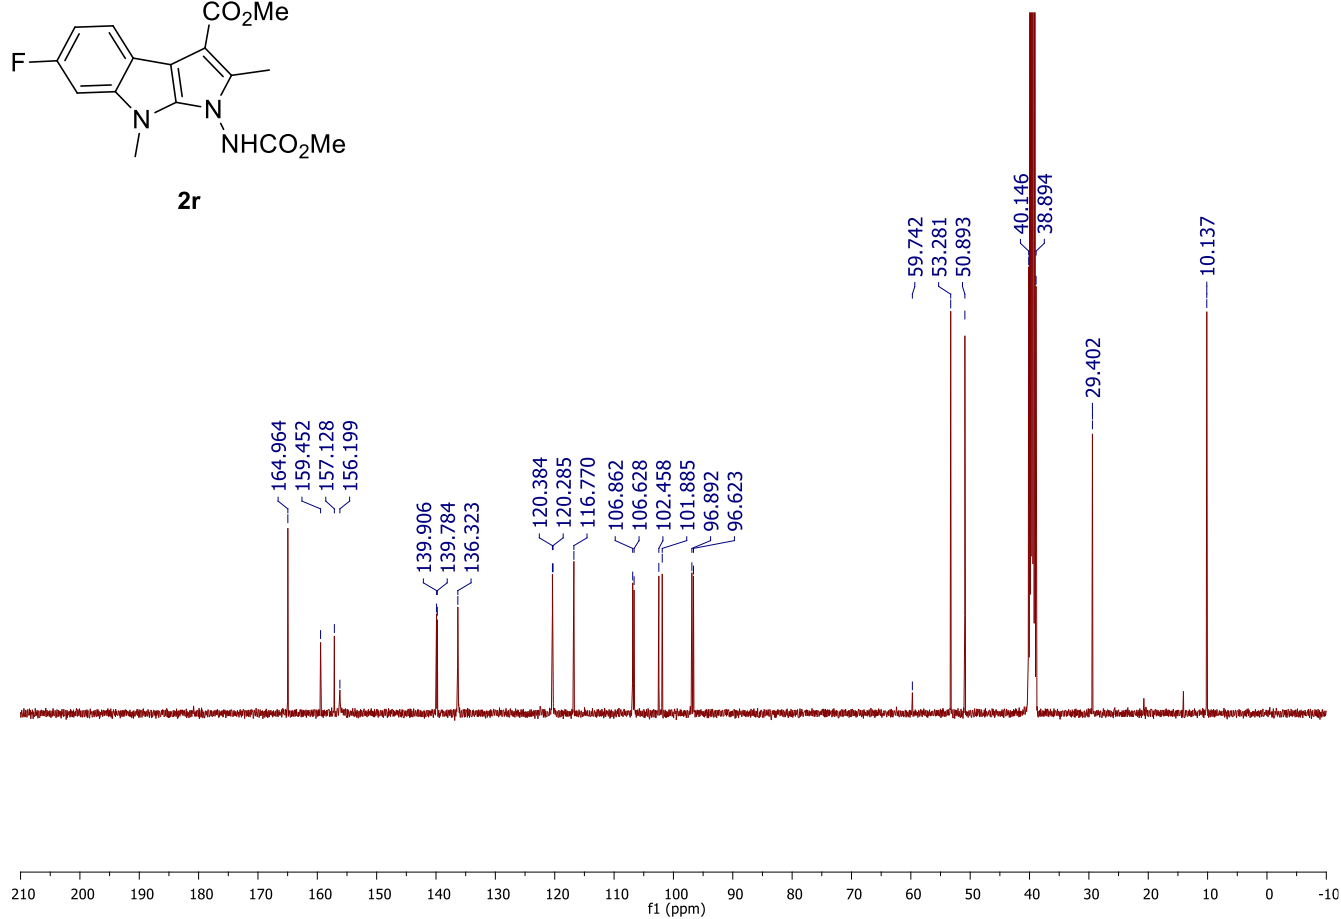

# ELECTRONIC SUPPORTING INFORMATION

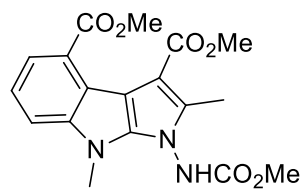

**2s**

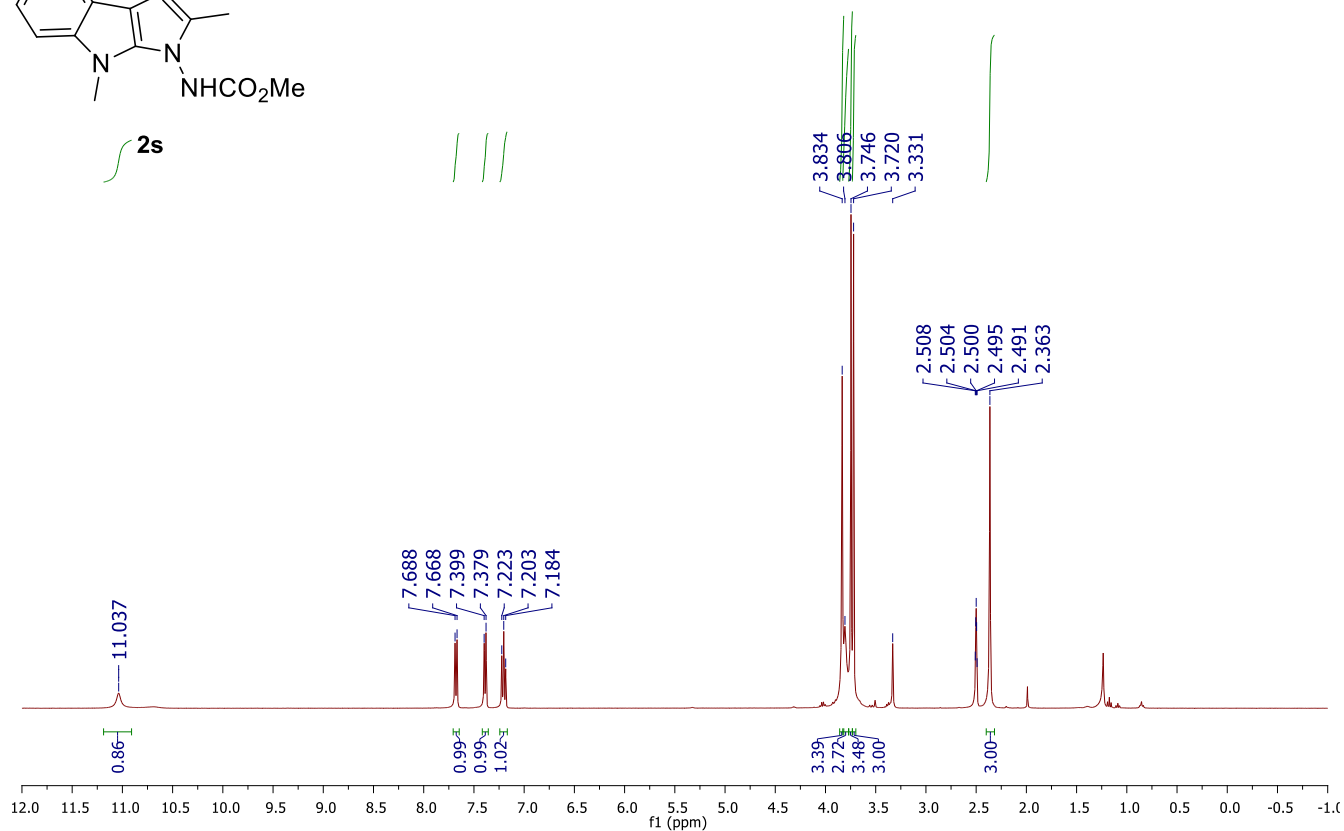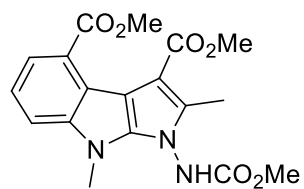

**2s**

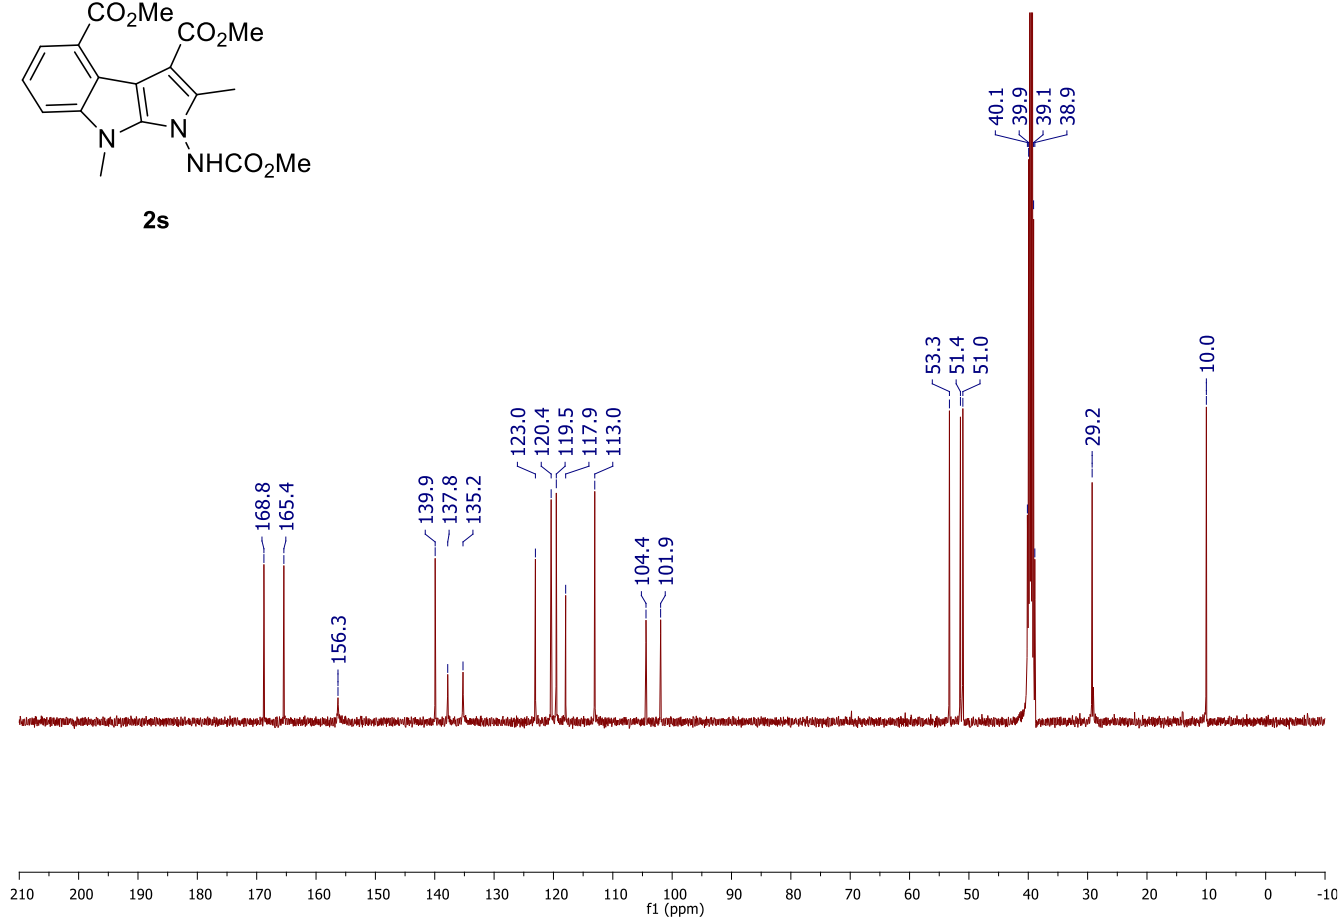

# ELECTRONIC SUPPORTING INFORMATION

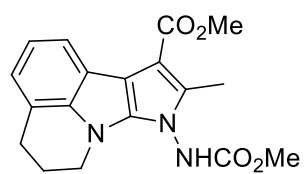

**2t**

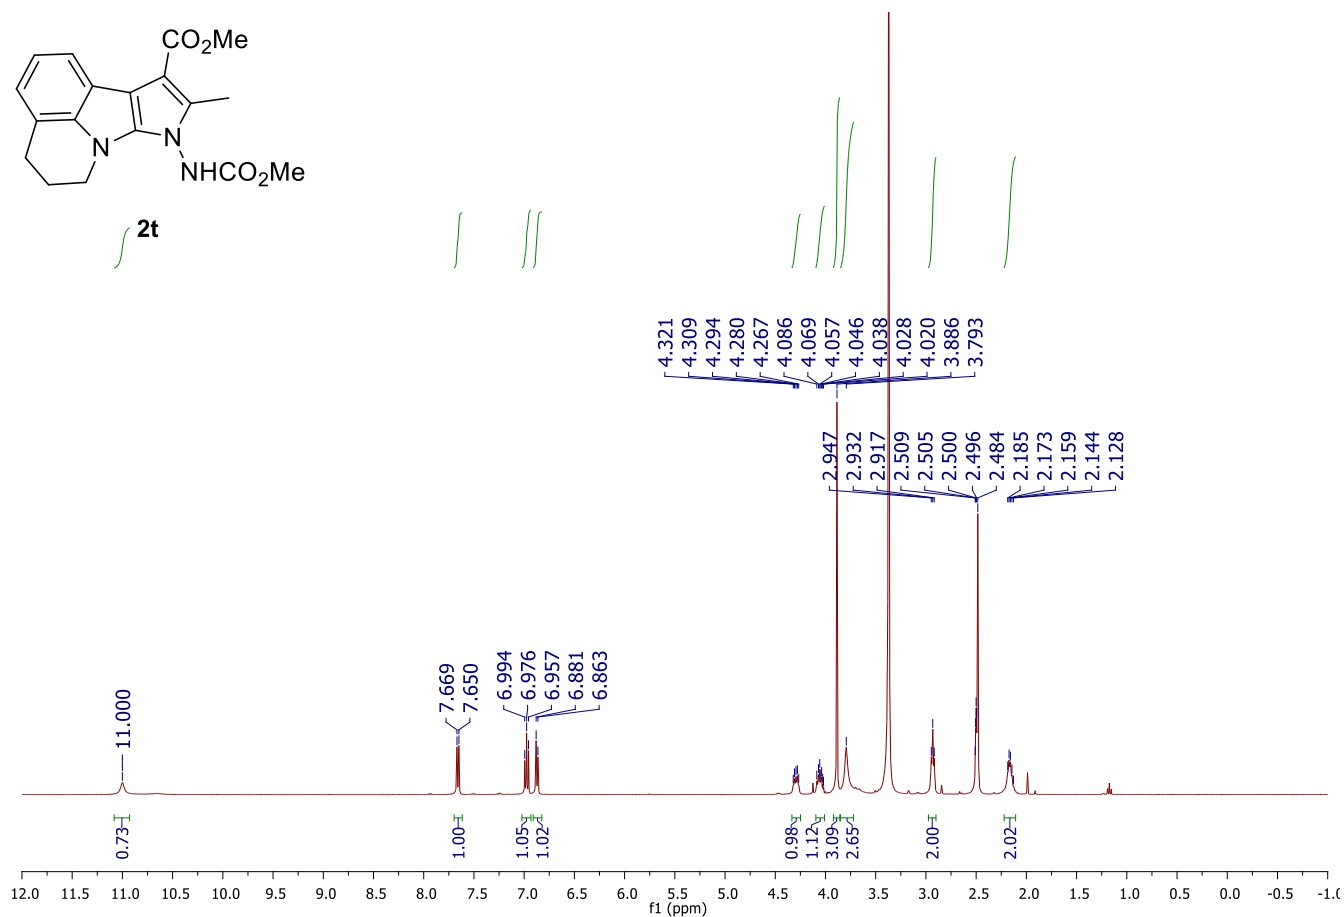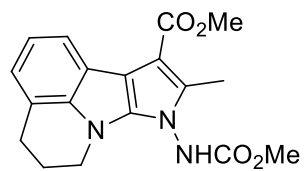

**2t**

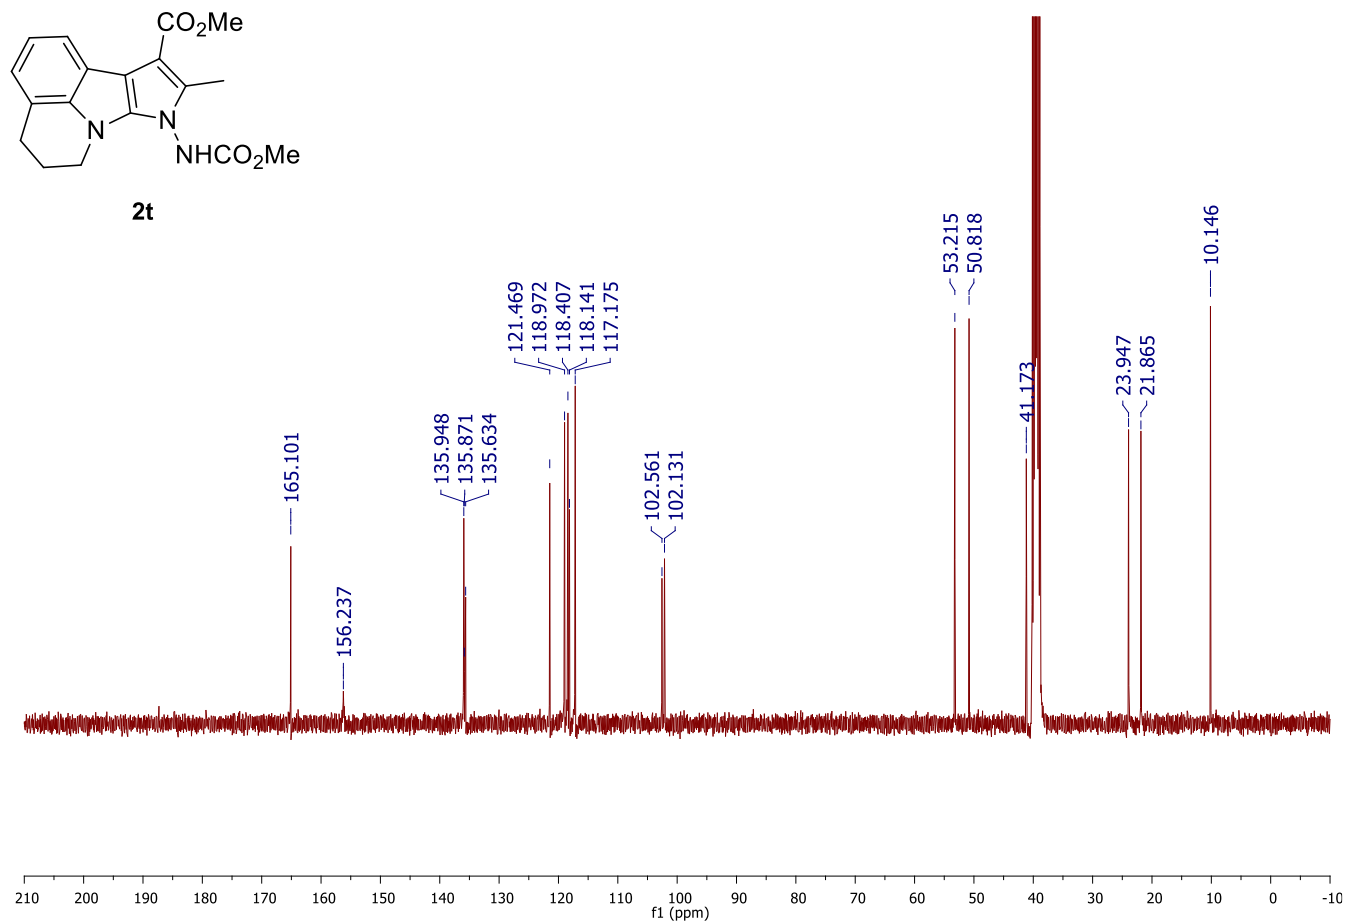

# ELECTRONIC SUPPORTING INFORMATION

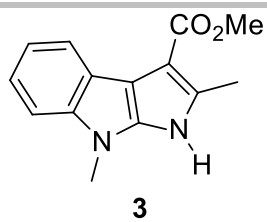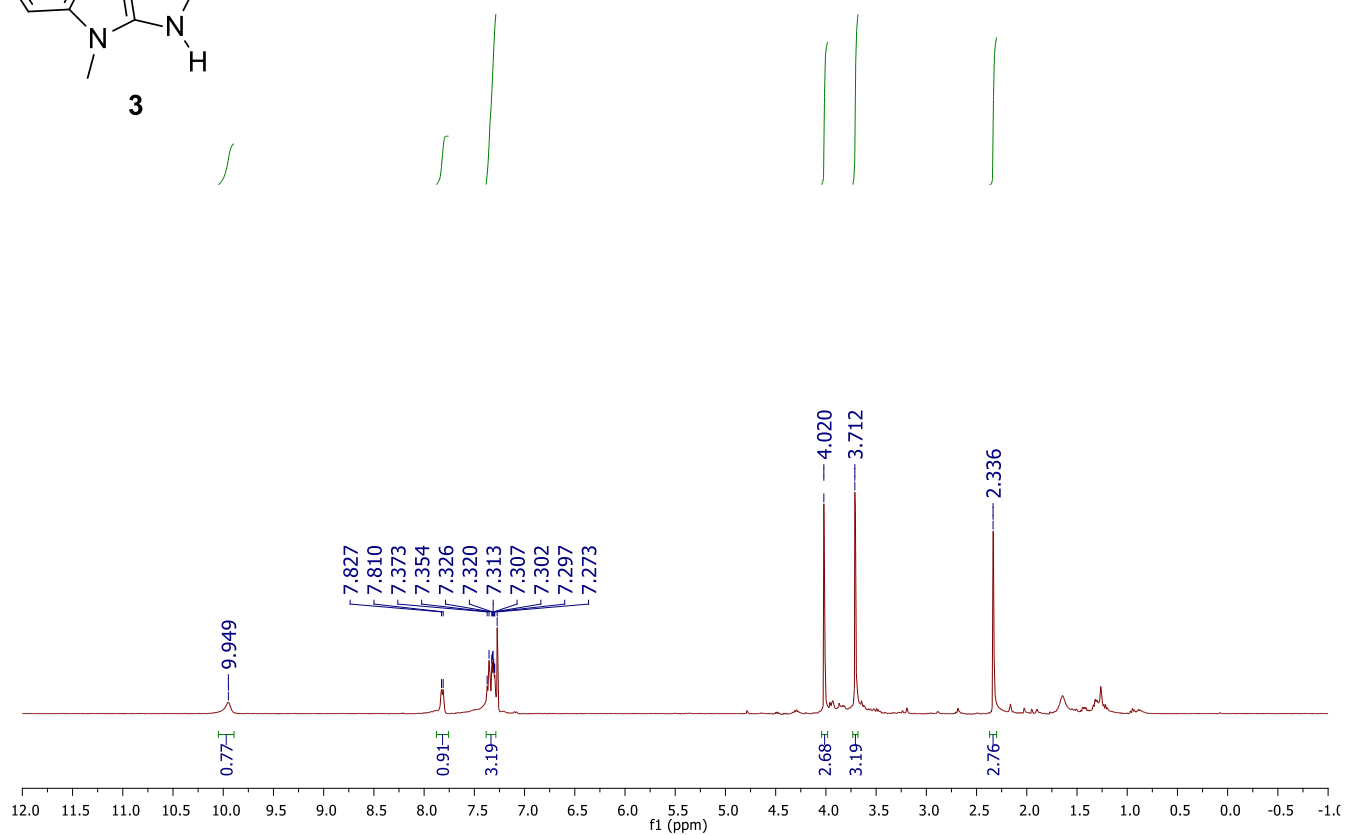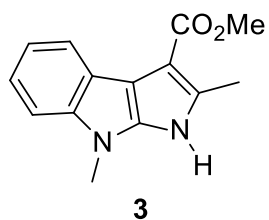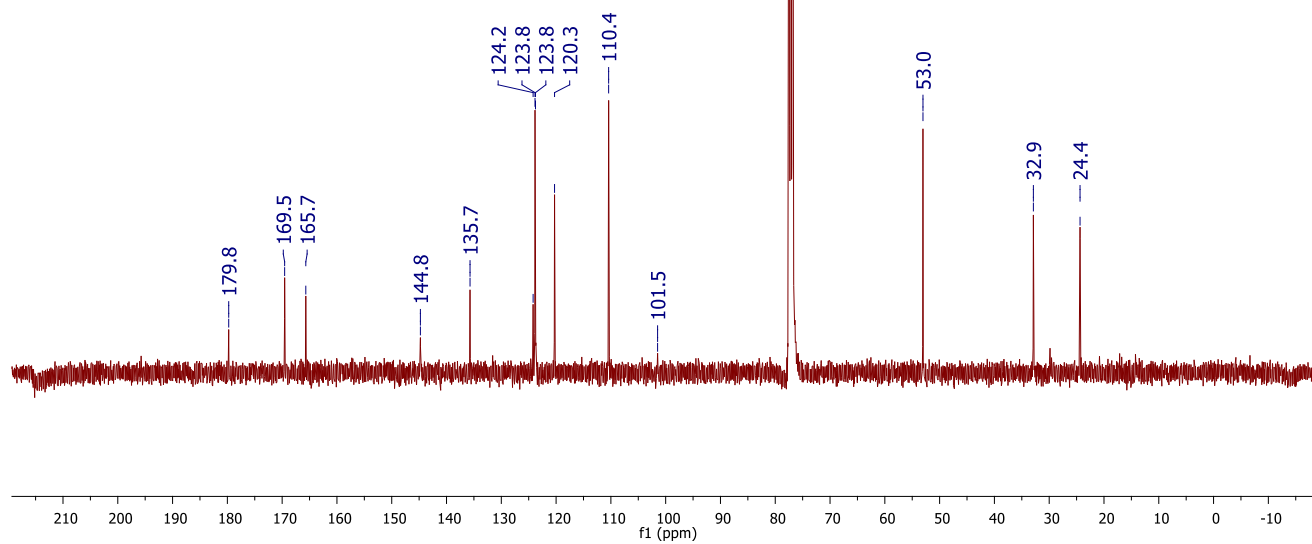

# ELECTRONIC SUPPORTING INFORMATION

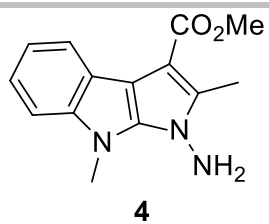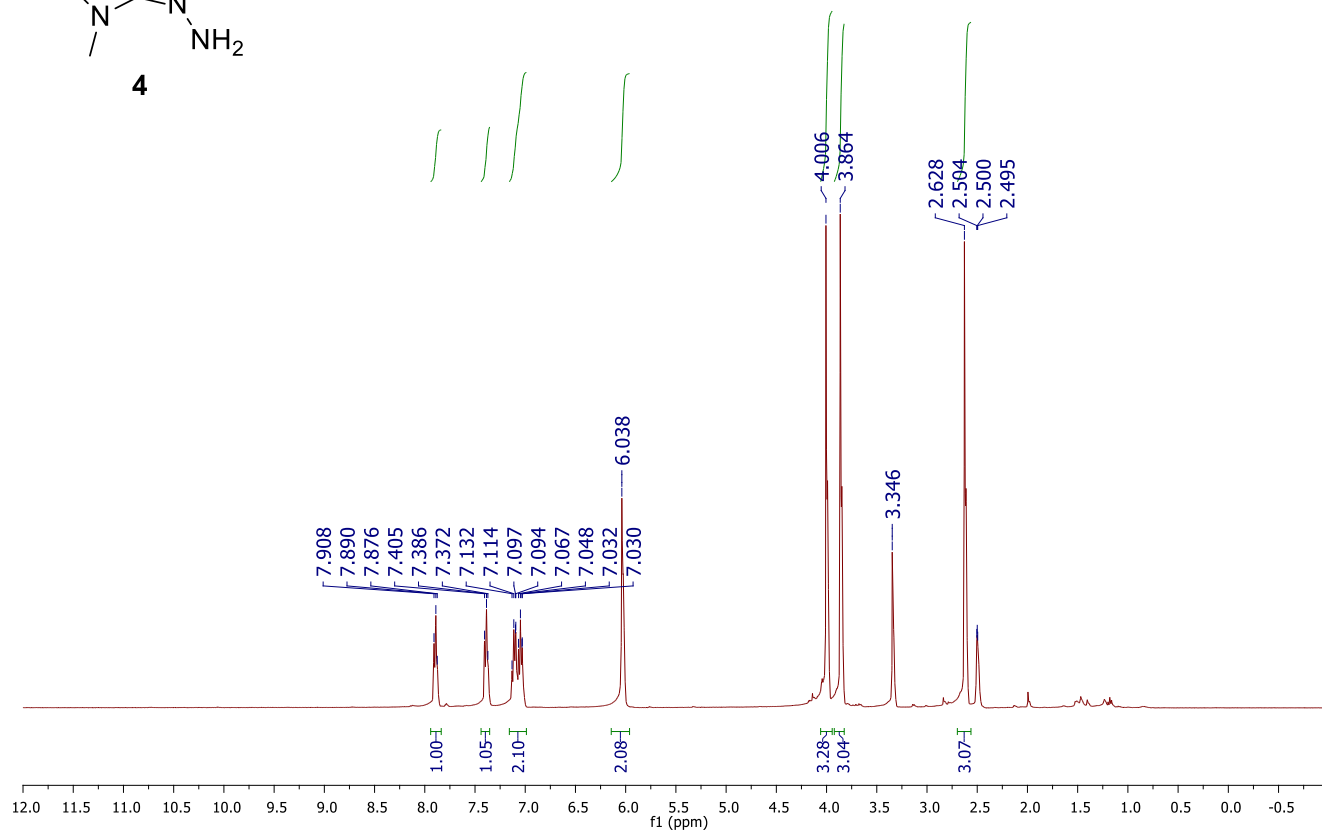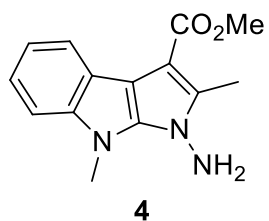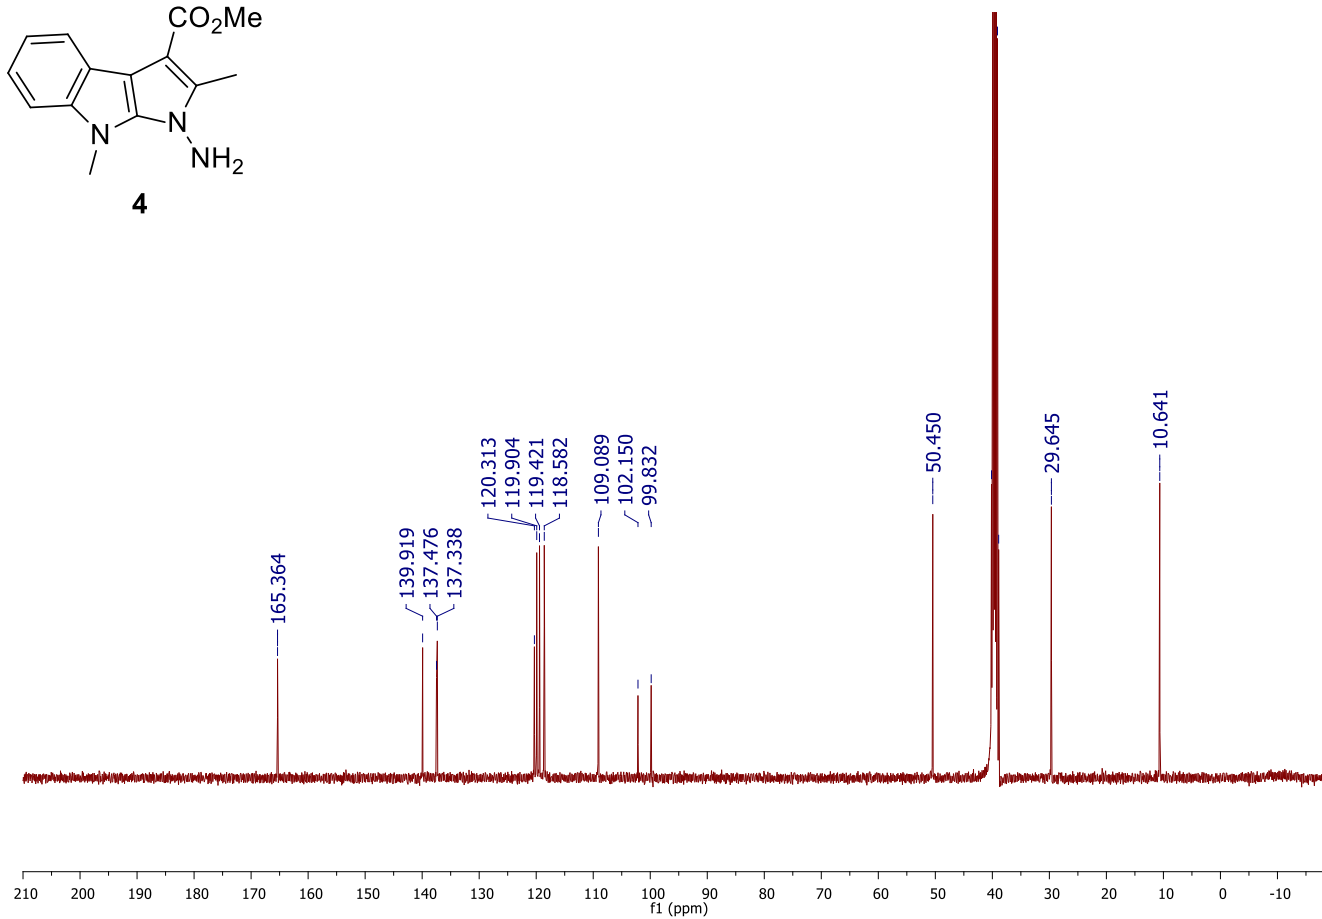

# ELECTRONIC SUPPORTING INFORMATION

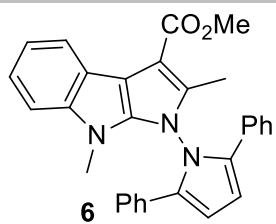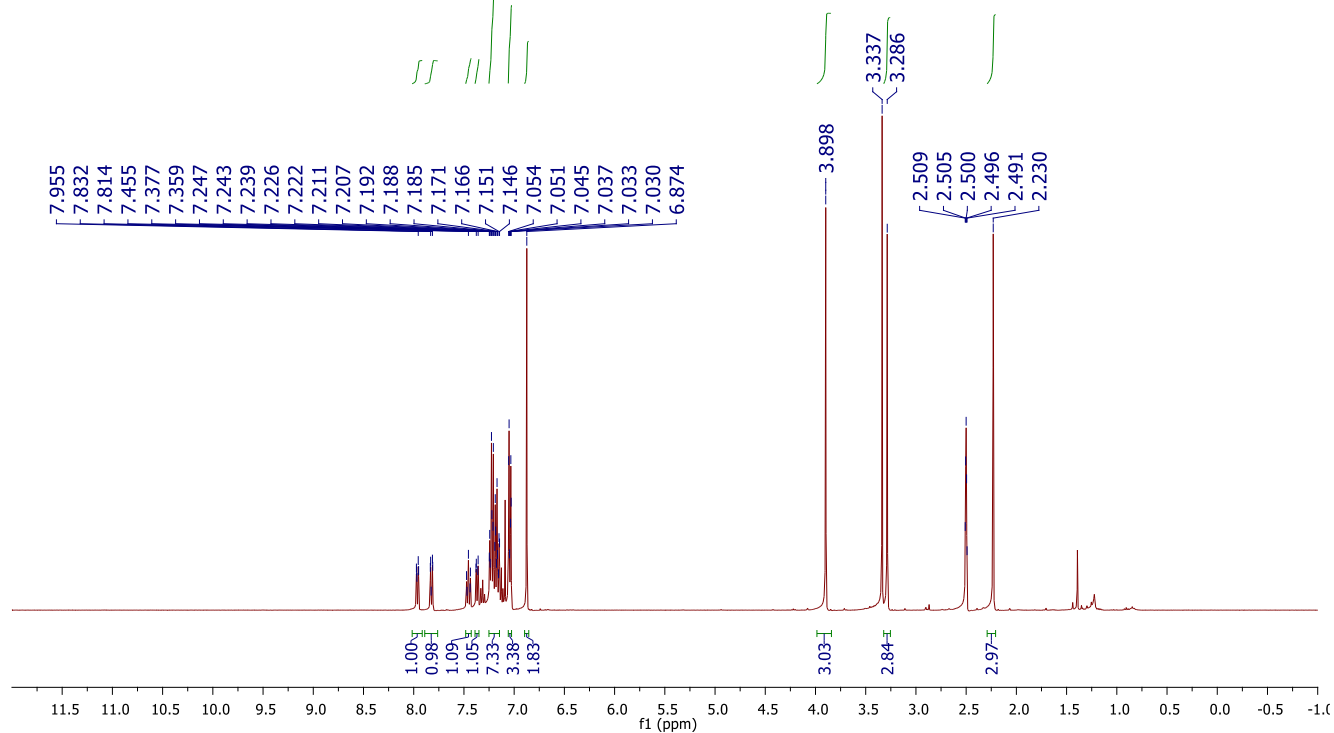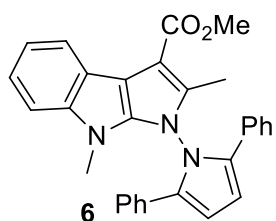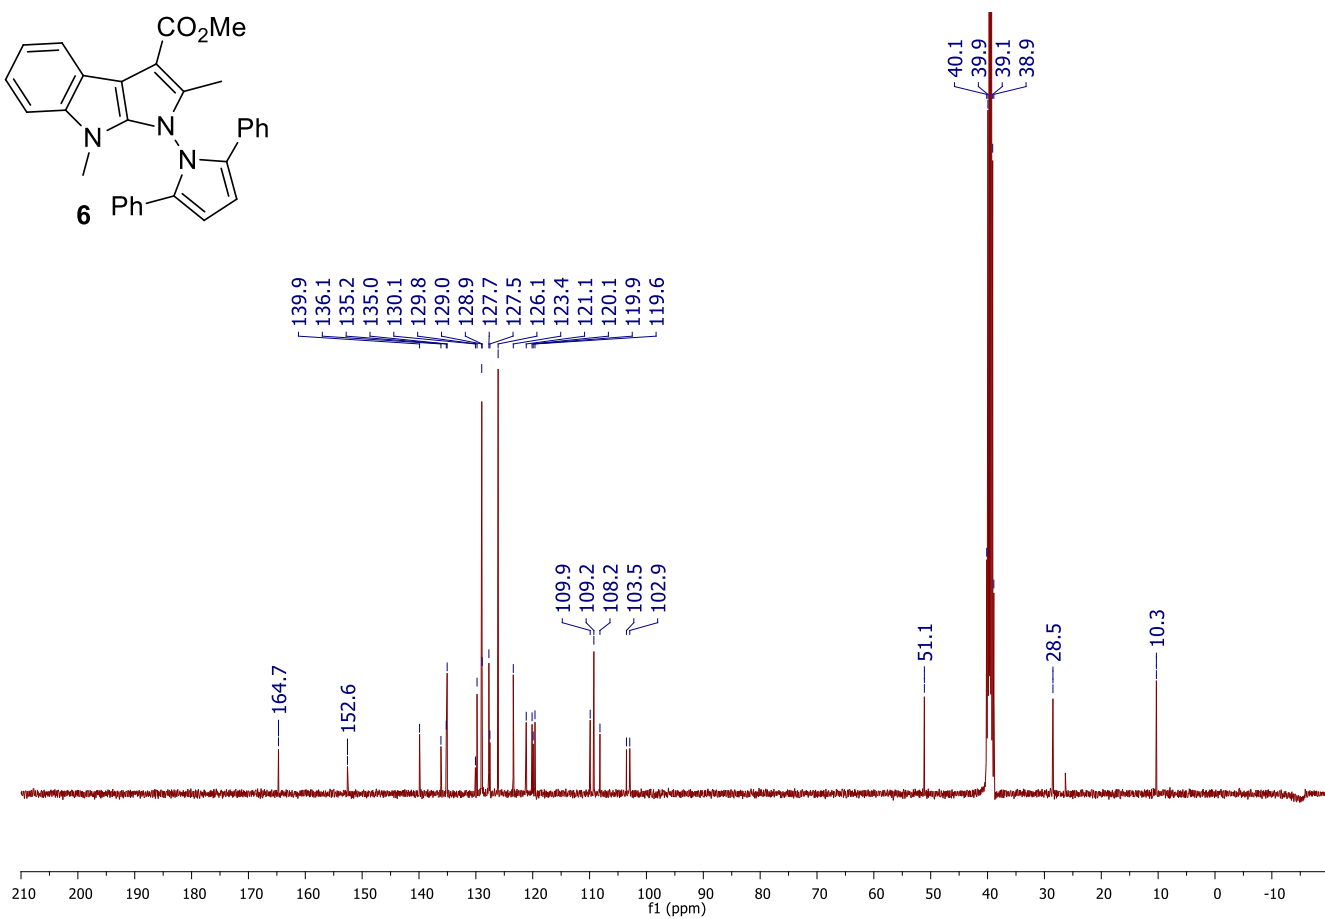

# ELECTRONIC SUPPORTING INFORMATION

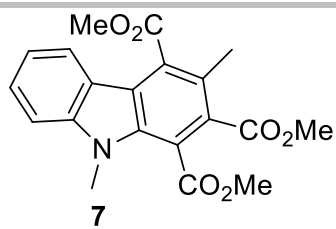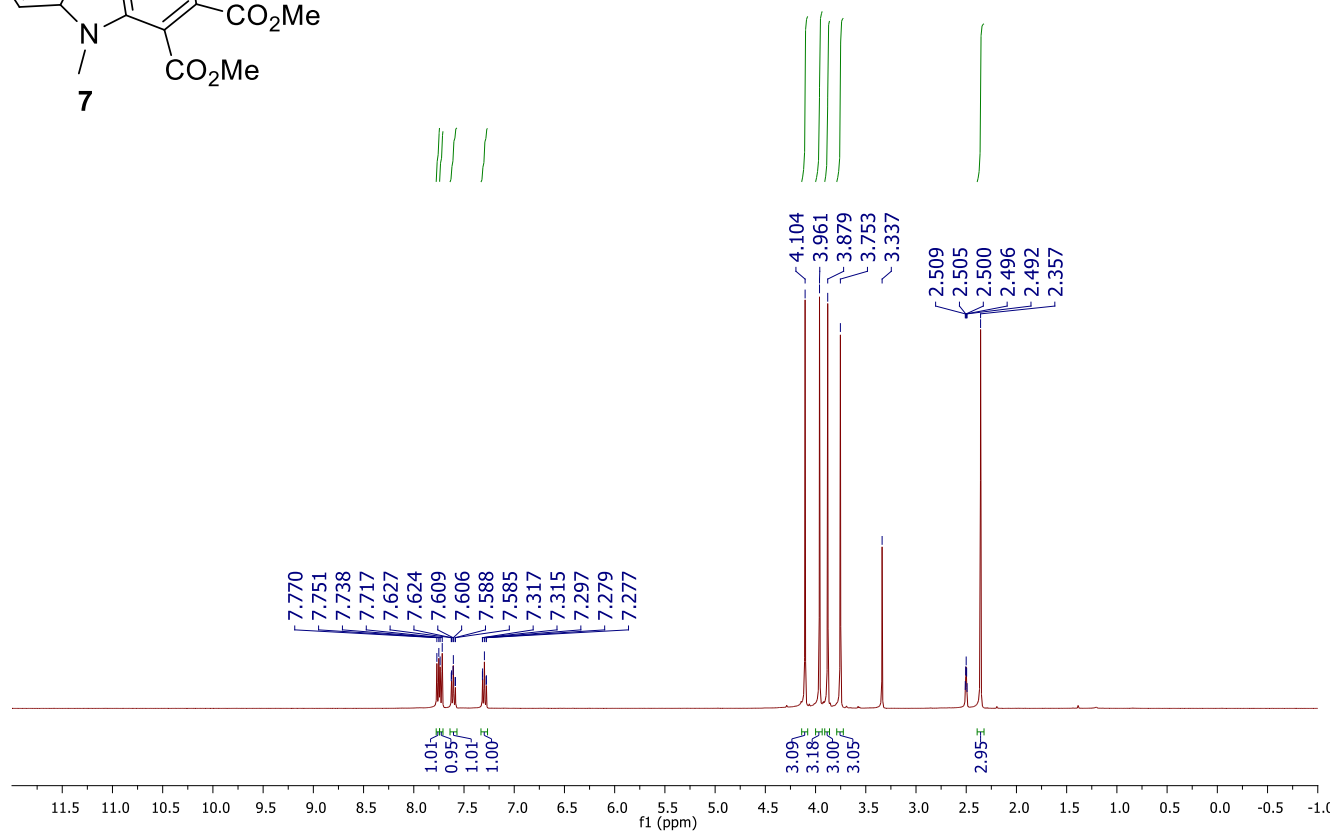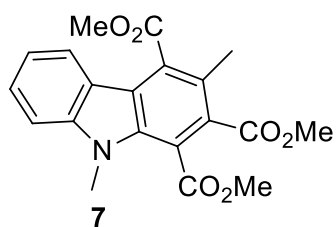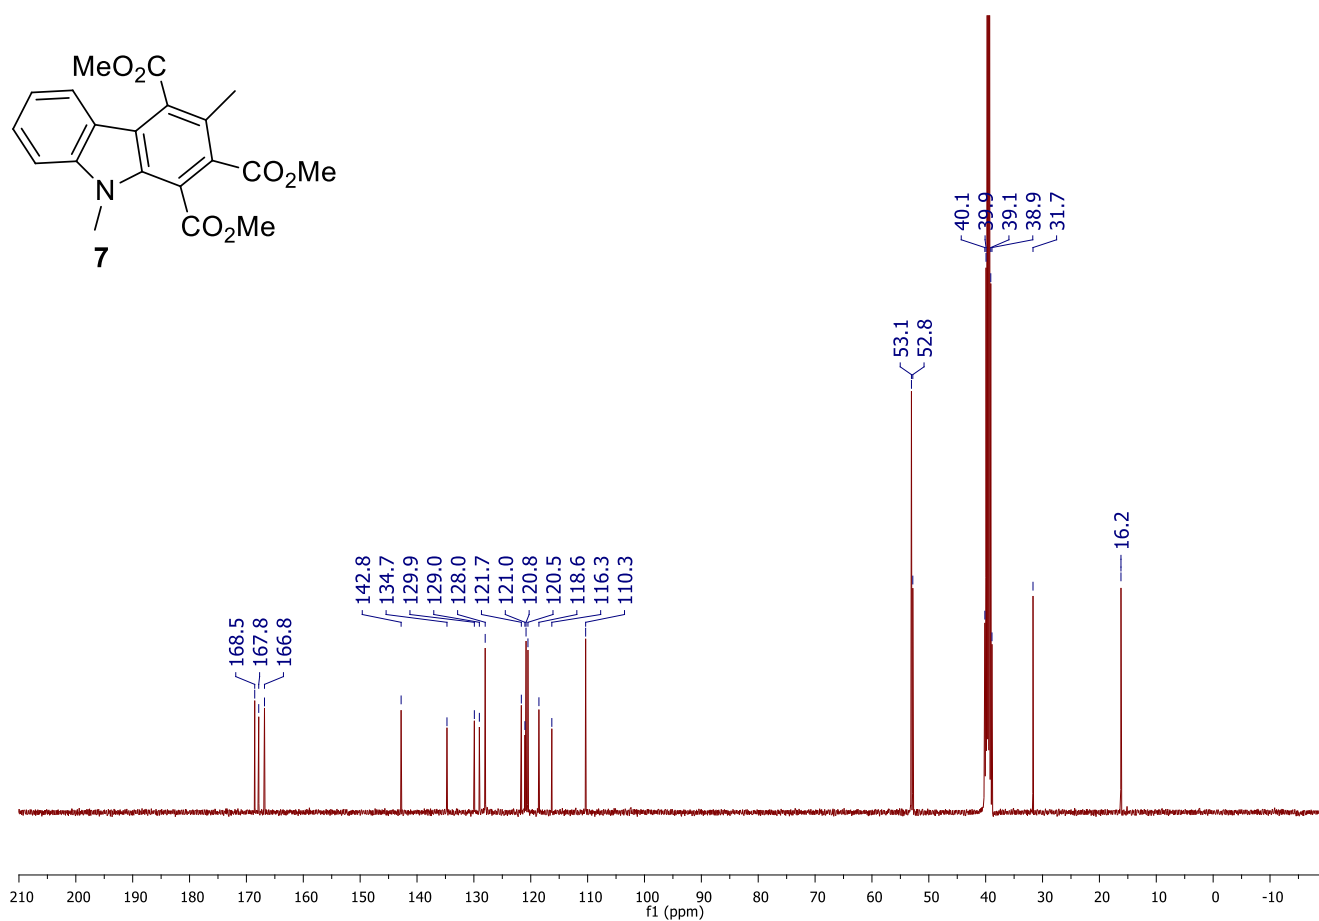



### 7. First Pass CHEM21 green metrics toolkit

#### Reaction carried out on a gram scale. Typical procedure.

In a round-bottom flask, methyl 2-(4-methoxy-3-(1-methyl-1*H*-indol-3-yl)-4-oxobutan-2-ylidene)hydrazinecarboxylate **1a** (3.15 mmol, 1 g), Cu(OAc)<sub>2</sub>·H<sub>2</sub>O (0.315 mmol, 62.9 mg), FeCl<sub>3</sub>·6H<sub>2</sub>O (0.157 mmol, 42.4 mg) and water (30 mL) were added. The aqueous suspension was stirred at 50 °C (oil bath) until consumption of the starting material (12 h, TLC check). Then, the crude product that precipitates was collected on a Büchner funnel, washed with water (5 mL), and dried in air or a vacuum desiccator to give the corresponding product **2a** (0.933 g, 94% yields).

# ELECTRONIC SUPPORTING INFORMATION

## Summary of First Pass Metrics Toolkit

Yield, AE, RME, MI/PMI and OE

| Reactant (Limiting Reactant First) | Mass (g)    | MW            | Mol     | Catalyst                               | Mass (g)    | Reagent | Mass (g)    | Reaction solvent | Volume (cm <sup>3</sup> ) | Density (g ml <sup>-1</sup> ) | Mass (g)     | Work up chemical | Mass (g)    | Workup solvent | Volume (cm <sup>3</sup> ) | Density (g ml <sup>-1</sup> ) | Mass (g)    |
|------------------------------------|-------------|---------------|---------|----------------------------------------|-------------|---------|-------------|------------------|---------------------------|-------------------------------|--------------|------------------|-------------|----------------|---------------------------|-------------------------------|-------------|
| 1a                                 | 1,00        | 317,345       | 0,00315 | Cu(OAc) <sub>2</sub> ·H <sub>2</sub> O | 0,0629      |         |             | H <sub>2</sub> O | 30,00                     | 1,00                          | 30,00        |                  |             | water          | 5,00                      | 1,00                          | 5,00        |
|                                    |             |               | #DIV/0! | FeCl <sub>3</sub> ·6H <sub>2</sub> O   | 0,0424      |         |             |                  |                           |                               | 0,00         |                  |             |                |                           |                               | 0,00        |
|                                    |             |               | #DIV/0! |                                        |             |         |             |                  |                           |                               | 0,00         |                  |             |                |                           |                               | 0,00        |
|                                    |             |               | #DIV/0! |                                        |             |         |             |                  |                           |                               | 0,00         |                  |             |                |                           |                               | 0,00        |
|                                    |             |               | #DIV/0! |                                        |             |         |             |                  |                           |                               | 0,00         |                  |             |                |                           |                               | 0,00        |
|                                    |             |               | #DIV/0! |                                        |             |         |             |                  |                           |                               | 0,00         |                  |             |                |                           |                               | 0,00        |
| <b>Total</b>                       | <b>1,00</b> | <b>317,35</b> |         |                                        | <b>0,11</b> |         | <b>0,00</b> |                  |                           |                               | <b>30,00</b> |                  | <b>0,00</b> |                |                           |                               | <b>5,00</b> |

$$RME = \frac{\text{mass of isolated product}}{\text{total mass of reactants}} \times 100$$

$$AE = \frac{\text{molecular weight of product}}{\text{total molecular weight of reactants}} \times 100$$

$$\text{mass intensity} = \frac{\text{total mass in a process or process step}}{\text{mass of product}}$$

$$OE = \frac{RME}{AE} \times 100$$

|                       | Flag  |       |
|-----------------------|-------|-------|
| Yield                 | 93,9  | 93,9  |
| Conversion            | 100,0 | 100,0 |
| Selectivity           | 93,9  | 93,9  |
| AE                    | 99,4  |       |
| RME                   | 93,9  | 93,9  |
| PMI total             | 38,7  |       |
| PMI Reaction          | 33,3  |       |
| reagents, catalyst    | 1,2   |       |
| PMI reaction solvents | 32,2  |       |
| PMI Workup            | 5,4   |       |
| PMI Workup chemical   | 0,0   |       |
| PMI workup solvents   | 5,4   |       |

| Product 2a                  | Mass  | MW      | Mol    |
|-----------------------------|-------|---------|--------|
|                             | 0,933 | 315,329 | 0,0030 |
| Unreacted limiting reactant | mass  |         |        |
|                             | 0,00  |         |        |

## Solvents (First Pass)

| Preferred solvents                                                                                                 | List solvents below                                                                                                                                                                     |
|--------------------------------------------------------------------------------------------------------------------|-----------------------------------------------------------------------------------------------------------------------------------------------------------------------------------------|
| water, EtOH, nBuOH, AcOpr, AcOnBu, PhOMe, MeOH, tBuOH, BnOH, ethylene glycol, acetone, MEK, MIBK, AcOEt, sulfolane | water                                                                                                                                                                                   |
| <b>Problematic solvents:</b> (acceptable only if substitution does not offer advantages)                           | DMSO, cyclohexanone, DMPU, AcOH, Ac <sub>2</sub> O, Acetonitrile, AcOMe, THF, heptane, Me-cyclohexane, toluene, xylene, MTBE, cyclohexane, chlorobenzene, formic acid, pyridine, Me-THF |
| <b>Hazardous solvents:</b> These solvents have significant health and/or safety concerns.                          | dioxane, pentane, TEA, diisopropyl ether, DME, DCM, DMF, DMA, NMP, methoxyethanol, hexane                                                                                               |
| <b>Highly hazardous solvents:</b> The solvents which are agreed not to be used, even in screening                  | Et <sub>2</sub> O, Benzene, CCl <sub>4</sub> , chloroform, DCE, nitromethane, CS <sub>2</sub> , HMPA                                                                                    |

## Catalyst/enzyme (First Pass)

| Catalyst or enzyme used, or reaction takes place without any catalyst/reagents. | Green Flag           | Tick |
|---------------------------------------------------------------------------------|----------------------|------|
| Use of stoichiometric quantities of reagents <td>Amber Flag <td></td> </td>     | Amber Flag <td></td> |      |
| Use of reagents in excess                                                       | Red Flag             |      |

| Facile recovery of catalyst/enzyme | Green Flag | Tick |
|------------------------------------|------------|------|
| catalyst/enzyme not recovered      | Amber Flag |      |

## Critical elements

| Supply remaining | Flag colour | Note element |
|------------------|-------------|--------------|
| 5-50 years       | Red Flag    |              |
| 50-500 years     | Amber Flag  | Cu           |
| +500 years       | Green Flag  |              |

## Energy (First Pass)

| Reaction run between 0 to 70°C               | Green Flag | Tick |
|----------------------------------------------|------------|------|
| Reaction run between -20 to 0 or 70 to 140°C | Amber Flag |      |
| Reaction run below -20 or above 140°C        | Red Flag   |      |

| Reaction run at reflux                                   | Red Flag   | Tick |
|----------------------------------------------------------|------------|------|
| Reaction run 5°C or more below the solvent boiling point | Green Flag | X    |

## Batch/flow

| Flow  | Green Flag | Tick |
|-------|------------|------|
| Batch | Amber Flag | X    |

## Work Up

| quenching                                                                                                  | Green Flag | List       |
|------------------------------------------------------------------------------------------------------------|------------|------------|
| filtration                                                                                                 |            | filtration |
| centrifugation                                                                                             |            |            |
| crystallisation                                                                                            |            |            |
| Low temperature distillation/evaporation/ sublimation (< solvent exchange, quenching into aqueous solvent) | Amber Flag |            |
| chromatography/ion exchange                                                                                | Red Flag   |            |
| high temperature multiple recrystallisation                                                                |            |            |

## Health & safety

|                            | Red Flag                     | Amber Flag                   | Green Flag                                                 | List substances and H-codes | List substances and H-codes | List substances and H-codes |
|----------------------------|------------------------------|------------------------------|------------------------------------------------------------|-----------------------------|-----------------------------|-----------------------------|
| Highly explosive           | H200, H201, H202, H203       | H205, H220, H224             | If no red or amber flagged H codes present then green flag | none                        | none                        | none                        |
| Explosive thermal runaway  | H230, H240, H250             | H241                         |                                                            |                             |                             |                             |
| Toxic                      | H300, H310, H330             | H301, H311, H331             |                                                            |                             |                             |                             |
| Long Term toxicity         | H340, H350, H360, H370, H372 | H341, H351, H361, H371, H373 |                                                            |                             |                             |                             |
| Environmental implications | H400, H410, H411, H420       | H401, H412                   |                                                            |                             |                             |                             |

## Use of chemicals of environmental concern

| Chemical identified as Substances of Very High Concern by ChemSec which are utilised | Red Flag | List substances of very high concern |
|--------------------------------------------------------------------------------------|----------|--------------------------------------|
|                                                                                      |          | none                                 |

### 8. References

- 1 (a) C. Ciccolini, L. De Crescentini, F. Mantellini, S. Santeusano, G. Favi, *Org. Lett.* 2019, **21**, 4388–4391; (b) C. Ciccolini, G. Mari, G. Gatti, G. F. Gatti, G. Giorgi, F. Mantellini, G. Favi, *J. Org. Chem.* 2020, **85**, 11409–11425.
- 2 M. Corrieri, L. De Crescentini, F. Mantellini, G. Mari, S. Santeusano, G. Favi, *J. Org. Chem.* 2021, **86**, 17918–17929.
- 3 (a) P. Magnus, N. Garizi, K. A. Seibert, A. Ornholt, *Org. Lett.* 2009, **11**, 5646–5648; (b) G.-J. Mei, X. Tang, Y. Tasdan, Y. Lu, *Angew. Chem. Int. Ed.* 2020, **59**, 648–652.
- 4 P. Shi, L. Wang, S. Guo, K. Chen, J. Wang, J. Zhu, *Org. Lett.* 2017, **19**, 4359–4362.
- 5 M. McLeod, N. Boudreault, Y. Leblanc, *J. Org. Chem.* 1996, **61**, 1180–1183.
- 6 A. G. Schultz, M. Shen, *Tetrahedron Lett.* 1979, **20**, 2969–2972.
